# Supplementary material for: Pathway activation model for personalized prediction of drug synergy
Source: eLife. 2025 Jun 3;13:RP100071. doi: 10.7554/eLife.100071 (PMC12133153; doi:10.7554/eLife.100071)
Supplement: Supplementary file 1. [file elife-100071-supp1.xlsx]

## Sheet: Table A - Prediction result
CELL_LINE	COMPOUND_A	COMPOUND_B	MAX_CONC_A	MAX_CONC_B	IC50_A	H_A	Einf_A	IC50_B	H_B	Einf_B	SYNERGY_SCORE	tissue_name	DIPx_pred	TAIJIM_pred
22RV1	AKT	AR	10	1	1	0	100	0.35	1.33	64.79	0.19	prostate	15.17	-0.35
22RV1	AKT	AR_1	10	1	2.75	2.77	63.28	0.35	1.22	63.51	8.9	prostate	15.17	-0.35
22RV1	AKT	ERBB	3	1	0	0.1	90.44	0.32	10	79.9	6.42	prostate	10.34	9.07
BT474	AKT	ERBB	3	3	0.41	1.44	0	0.22	2.13	7.83	33.93	breast	28.35	12.73
CAL148	AKT	ERBB	1	1	1	0	100	0.17	1.51	0	6.87	breast	8.48	7.1
HCC1187	AKT	ERBB	1	1	1	0	100	0.43	1.81	55.9	14.63	breast	5.15	1.91
HCC1569	AKT	ERBB	3	3	0	0.1	60.52	0	0.1	67.84	-34.31	breast	18.74	2.6
HCC1806	AKT	ERBB	1	1	1	0	100	0.41	10	71.7	8.39	breast	9.82	-0.91
HCC1937	AKT	ERBB	1	1	0.01	2.06	76.54	0.43	0.65	47.16	35.77	breast	26.3	17.69
HCC70	AKT	ERBB	3	3	0.42	0.77	0	0.17	0.7	0	-0.26	breast	33.33	10.13
HT1197	AKT	ERBB	3	1	1	0	100	0.32	0.78	38.21	-17.83	urinary_tract	13.57	-0.71
MCF 7,00	AKT	ERBB	3	3	0	0.1	62.55	0.98	0.64	0	-5.33	breast	26.19	17.53
MDAMB436	AKT	ERBB	3	3	3	0.45	82.36	1.69	0.3	21.51	12.89	breast	7.79	-5.39
TCCSUP	AKT	ERBB	3	3	3	3.02	86.21	0.38	0.88	57.66	47.01	urinary_tract	20.17	25.77
HCC1143	AKT	FGFR	1	1	0.01	1.63	94.61	0.16	0.98	72.14	3.7	breast	-6.05	1.62
HCC1428	AKT	FGFR	1	1	1	0	100	0.06	10	93.8	-6.31	breast	-3.44	-2.91
HCC38	AKT	FGFR	1	1	0.1	10	76.8	1	10	74.2	-24.16	breast	1.54	-0.93
HT1197	AKT	FGFR	3	1	1	10	78.4	0.1	2.53	58.54	-3.89	urinary_tract	-2.69	-12.39
HT1376	AKT	FGFR	3	3	3	1.69	48.02	0.1	0.87	29.5	-5.03	urinary_tract	-2.56	-11.46
KATOIII	AKT	FGFR	0.01	3	0	10	18.2	0.33	2.76	41.56	-16.87	stomach	4.42	-16.02
MDAMB436	AKT	FGFR	1	1	0.27	2.93	90.39	0.18	3.6	77.28	2.32	breast	-3.53	-13.51
MDAMB468	AKT	FGFR	1	1	1	0	100	0.31	10	43.7	-8.77	breast	1.07	-10.29
NCIH520	AKT	FGFR	3	3	0.07	3.4	68.09	0.35	1.47	37.47	51.87	lung	12.4	-5.71
RT4	AKT	FGFR	3	3	0.9	0.66	7.44	1	0	100	-16.66	urinary_tract	35.12	47.9
22RV1	AKT	JAK	10	1	1.31	5.28	23.24	0.33	10	74	19.47	prostate	3.36	-2.07
22RV1	AKT	PIK3CB_PIK3CD	1	1	0.31	10	83.4	1	0.4	32.64	2.59	prostate	12.93	-2.93
647V	AKT	PIK3CB_PIK3CD	3	3	0.48	1.14	1.86	0.52	1.66	4.14	1.68	urinary_tract	17.63	2.52
BFTC905	AKT	PIK3CB_PIK3CD	3	3	0.19	0.85	25.14	0.11	0.92	31.3	27.89	urinary_tract	25.82	-0.36
BT20	AKT	PIK3CB_PIK3CD	1	1	0.28	0.78	82.26	0.12	10	84.6	12	breast	8.12	6.83
BT549	AKT	PIK3CB_PIK3CD	1	1	0.38	0.42	0	0.73	0.72	0	4.07	breast	11.63	2.52
CAL120	AKT	PIK3CB_PIK3CD	1	1	0.1	10	60.45	0.32	0.69	42.89	2.85	breast	17.17	2.52
CAL148	AKT	PIK3CB_PIK3CD	1	1	0.5	1.83	0	0.16	1.36	0	7.33	breast	12.19	-4.8
CAL51	AKT	PIK3CB_PIK3CD	1	1	1	0.3	64.55	0.76	0.7	0	-5.18	breast	5.16	-6.71
CAMA1	AKT	PIK3CB_PIK3CD	1	1	0.22	0.77	0	0.14	1	4.21	17.14	breast	41.05	12.98
HCC1143	AKT	PIK3CB_PIK3CD	1	1	0.59	0.7	40.69	0.27	1.23	69.96	-5.93	breast	3.34	1.41
HCC1187	AKT	PIK3CB_PIK3CD	1	1	0.26	10	76.1	0.31	10	57.5	16.53	breast	12.59	-1.36
HCC1395	AKT	PIK3CB_PIK3CD	1	1	0.06	0.47	50.66	1	0.82	0	11.28	breast	11.1	10.86
HCC1428	AKT	PIK3CB_PIK3CD	1	1	0.38	10	92.3	0.18	10	93.05	-5.45	breast	-2.29	2.54
HCC1806	AKT	PIK3CB_PIK3CD	1	1	1	0	100	0.34	10	67	16.91	breast	36.07	-7.22
HCC1937	AKT	PIK3CB_PIK3CD	1	1	0.13	0.51	60.91	0.37	0.67	52.32	8.71	breast	16.26	13.51
HCC38	AKT	PIK3CB_PIK3CD	1	1	1	2.32	45.54	1	0.33	74.16	-12.55	breast	6.65	-11.09
HCC70	AKT	PIK3CB_PIK3CD	1	1	0.19	3.28	12.98	0.27	10	17.6	11.03	breast	15.47	6.47
HT1197	AKT	PIK3CB_PIK3CD	3	1	0.18	10	86.62	1	0.47	12.06	-19.84	urinary_tract	22.1	2.52
HT1376	AKT	PIK3CB_PIK3CD	3	3	0.09	1.08	49.8	0.11	1.54	43.91	8.46	urinary_tract	18.97	13.79
J82	AKT	PIK3CB_PIK3CD	3	3	3	0.55	2.93	0.82	1.18	29.39	16.4	urinary_tract	17.6	6.02
MDAMB157	AKT	PIK3CB_PIK3CD	1	1	0.03	0.91	53.89	0.14	0.71	61.04	8.05	breast	12.36	2.52
MDAMB436	AKT	PIK3CB_PIK3CD	1	1	0.15	0.96	66.47	0.2	2.97	75.3	-7.77	breast	7.03	-0.74
MDAMB453	AKT	PIK3CB_PIK3CD	1	1	0.12	1.14	36.96	0.21	1.18	12.47	-4.42	breast	23.84	11.61
MDAMB468	AKT	PIK3CB_PIK3CD	1	1	0.32	10	80.4	0.3	10	40.9	-8.59	breast	34.51	28.24
SW780	AKT	PIK3CB_PIK3CD	3	3	1	0	100	0.31	1.77	26.18	-41.79	urinary_tract	7.34	7.49
T24	AKT	PIK3CB_PIK3CD	3	3	3	10	92.6	1	0	100	-34.44	urinary_tract	14.72	2.52
TCCSUP	AKT	PIK3CB_PIK3CD	3	3	3	0.35	16.62	0.07	1.23	57.34	-18.88	urinary_tract	16.86	32.91
UMUC3	AKT	PIK3CB_PIK3CD	3	3	0.83	1.29	71.6	1.23	2.32	76.92	-0.67	urinary_tract	10.26	2.08
VMCUB1	AKT	PIK3CB_PIK3CD	3	3	3	1.02	43.67	0.5	1.8	67.34	28.29	urinary_tract	17.32	23.69
22RV1	AKT	PIM1	10	1	0.39	1.52	83.64	0.4	10	72.8	49.44	prostate	15.57	0.63
647V	AKT	PIM1	3	3	1	0	100	0.65	1.32	0	31.13	urinary_tract	21.68	5.64
BFTC905	AKT	PIM1	3	3	0.33	10	69.2	0.19	1.55	35.25	21.04	urinary_tract	32.92	5.95
BT20	AKT	PIM1	1	1	1	0.67	40.6	0.21	2.11	77.81	8.99	breast	24.69	19.38
BT549	AKT	PIM1	1	1	1	0.58	46.66	0.42	0.68	27.86	35.55	breast	14	5.64
CAL120	AKT	PIM1	1	1	1	0	100	1	0.43	25.03	-0.9	breast	16.06	5.64
CAL148	AKT	PIM1	1	1	1	0	100	0.16	1.15	0	16.93	breast	20	6.29
CAL51	AKT	PIM1	1	1	0.32	10	93.1	0.23	2.09	51.82	23.75	breast	0.01	-9.11
CAMA1	AKT	PIM1	1	1	0.25	10	92.6	0.15	1.3	7.04	39.51	breast	17.75	9.08
DU4475	AKT	PIM1	1	1	0.05	2.07	1.68	0.22	3.79	39.32	-2.21	breast	11.26	-2.19
HCC1143	AKT	PIM1	1	1	0.01	10	90.25	1	0.38	43.94	12.93	breast	10.73	0.36
HCC1187	AKT	PIM1	1	1	0.1	1.41	66.55	1	1.06	20.32	44.8	breast	27.73	-3.83
HCC1395	AKT	PIM1	1	1	0.29	10	86.6	0.36	1.66	47.91	33.46	breast	14.68	15.87
HCC1428	AKT	PIM1	1	1	0.29	10	80.1	1	0	100	-11.6	breast	9.84	7.06
HCC1806	AKT	PIM1	1	1	1	10	68.2	1	1.49	17.81	23.05	breast	18.55	-6.19
HCC1937	AKT	PIM1	1	1	1	0.35	83.53	0.18	1.11	63.79	-6.54	breast	16.83	9.29
HCC38	AKT	PIM1	1	1	1	0	100	0.01	1.15	79.38	-7.2	breast	14.91	-4.64
HCC70	AKT	PIM1	1	1	0.12	10	93.8	0.24	1.08	0	42.92	breast	12.48	-1.77
HT1197	AKT	PIM1	3	1	3	0.32	72.4	0.06	1.14	64.89	64	urinary_tract	28.7	5.64
HT1376	AKT	PIM1	3	3	1.02	10	75.2	0.13	0.58	24.76	32.48	urinary_tract	13.29	9.08
J82	AKT	PIM1	3	3	0.71	1.59	83.73	0.49	1.38	44.16	39.26	urinary_tract	15.89	4.57
MDAMB157	AKT	PIM1	1	1	0.17	10	89.15	0.22	3.24	74.24	8.3	breast	20.05	5.64
MDAMB436	AKT	PIM1	1	1	0.17	10	87.38	0.3	2.92	72.51	3.17	breast	8.75	-6.23
MDAMB453	AKT	PIM1	1	1	0.37	10	92.8	0.25	1.29	24.15	29.37	breast	13.35	13.55
MDAMB468	AKT	PIM1	1	1	0.09	1.29	89.79	0.32	1.23	13.98	15.34	breast	13.32	9.98
SW780	AKT	PIM1	3	3	0.07	2.02	76.79	0.18	1.47	24.63	-23.37	urinary_tract	10.78	0.51
T24	AKT	PIM1	3	3	0	0.1	92.86	1	0	100	-42.96	urinary_tract	8.25	5.64
TCCSUP	AKT	PIM1	3	3	1	0	100	0.59	1.49	66.38	101.21	urinary_tract	17.43	32.5
UMUC3	AKT	PIM1	3	3	1	0	100	1.08	10	84.3	13.85	urinary_tract	13.61	5.59
22RV1	AR	AR_1	10	10	10	10	47.4	1	0	100	16.86	prostate	14.01	8.09
22RV1	AR	PIK3CB_PIK3CD	1	10	0.02	10	86.13	10	0.47	49.19	-3.6	prostate	17.11	-9.18
22RV1	AR_1	PIK3CB_PIK3CD	1	10	1	0.38	74.1	2.16	1.21	28.13	-11	prostate	17.11	-9.18
22RV1	ERBB	PIK3CB_PIK3CD	1	3	0.29	1.53	86.85	0.06	10	91.9	-7.59	prostate	5.09	18.4
647V	ERBB	PIK3CB_PIK3CD	3	0.1	0.64	1.44	8.23	0.05	1.14	73.9	33.15	urinary_tract	10.48	1.47
BT20	ERBB	PIK3CB_PIK3CD	1	1	0.19	1.15	85.23	0.17	2.27	77.59	19.23	breast	18.57	-0.57
BT549	ERBB	PIK3CB_PIK3CD	1	1	0.73	0.53	0	0.3	10	85.7	20.93	breast	-1.94	1.47
CAL120	ERBB	PIK3CB_PIK3CD	1	1	0.11	0.85	55.1	0	0.1	94.91	-3.72	breast	0.54	1.47
CAL148	ERBB	PIK3CB_PIK3CD	1	1	0.47	1.89	13.52	1	0	100	-14.32	breast	-5.36	-5.39
CAL51	ERBB	PIK3CB_PIK3CD	1	1	0.23	1.61	82.71	0.36	10	87.9	0.5	breast	7.51	-3.68
DU4475	ERBB	PIK3CB_PIK3CD	1	1	1	2.57	3.05	1	0	100	21.97	breast	12.06	1.09
HCC1143	ERBB	PIK3CB_PIK3CD	1	1	1	0.49	31.35	0.02	0.96	59.69	26.61	breast	12.87	15.11
HCC1187	ERBB	PIK3CB_PIK3CD	1	1	0.3	2.54	75.69	1	0	100	7.54	breast	6.89	3.95
HCC1428	ERBB	PIK3CB_PIK3CD	1	1	0.02	1.12	87.92	0.04	0.41	84.91	7.16	breast	0.85	-3.11
HCC1806	ERBB	PIK3CB_PIK3CD	1	1	1	0	100	1	0	100	-15.62	breast	4.03	7.86
HCC1937	ERBB	PIK3CB_PIK3CD	1	1	1	0.27	40.52	0	0.77	76.52	54.84	breast	14.98	21.13
HCC38	ERBB	PIK3CB_PIK3CD	1	1	0.47	0.86	58.38	1	0	100	29.73	breast	10.72	-0.49
HCC70	ERBB	PIK3CB_PIK3CD	1	1	0.16	1.63	3.03	1	0	100	48.84	breast	9.81	24.15
HT1197	ERBB	PIK3CB_PIK3CD	3	3	0.03	0.6	86.93	1	0	100	-43.08	urinary_tract	7.72	1.47
HT1376	ERBB	PIK3CB_PIK3CD	3	1	0.47	0.43	0	0.13	0.53	16.45	64.79	urinary_tract	12.11	3.79
J82	ERBB	PIK3CB_PIK3CD	3	3	1.43	0.33	0	0	8.5	78.08	9.32	urinary_tract	11.24	23.62
MDAMB157	ERBB	PIK3CB_PIK3CD	1	1	0.07	0.64	49.64	1	0.33	55.29	13.05	breast	12.98	1.47
MDAMB436	ERBB	PIK3CB_PIK3CD	1	1	0.11	1.9	71.56	0.2	10	93.43	2.23	breast	0.34	0.9
MDAMB453	ERBB	PIK3CB_PIK3CD	1	1	0.2	1.2	28.17	0.29	10	46.5	18.79	breast	3.86	-0.24
MDAMB468	ERBB	PIK3CB_PIK3CD	1	1	0.29	10	77.6	0.03	10	87.9	201.85	breast	43.31	1.47
SW780	ERBB	PIK3CB_PIK3CD	3	3	1	0	100	1	0	100	-43.33	urinary_tract	-23.23	-35.07
T24	ERBB	PIK3CB_PIK3CD	3	3	3	10	75.4	3	10	78.4	6.89	urinary_tract	3.03	1.47
TCCSUP	ERBB	PIK3CB_PIK3CD	3	3	1.31	0.67	39.55	0	0.1	90.47	8.96	urinary_tract	13.37	11.78
UMUC3	ERBB	PIK3CB_PIK3CD	3	3	0.98	10	79.8	3	1.83	53.1	8.8	urinary_tract	1.75	-3.01
VMCUB1	ERBB	PIK3CB_PIK3CD	3	3	2.42	2.42	0	0.38	0.61	63.42	7.36	urinary_tract	2.99	-6.17
22RV1	JAK	PIK3CB_PIK3CD	1	10	1	0.56	58.26	1.43	2.21	24.38	19.68	prostate	3.98	-4.15
22RV1	PIK3CB_PIK3CD	PIM1	10	1	3.64	0.41	56.73	1	0.55	61.88	33.52	prostate	18.09	4.28
647V	PIK3CB_PIK3CD	PIM1	3	3	1	0	100	0.71	1.6	10.59	61.26	urinary_tract	24.99	1.86
BFTC905	PIK3CB_PIK3CD	PIM1	3	3	0.34	10	88.15	0.31	0.99	21.13	35.43	urinary_tract	33.82	4.28
BT20	PIK3CB_PIK3CD	PIM1	1	1	0.2	3.57	81.81	0.35	10	83.6	28.86	breast	21.75	0.85
BT549	PIK3CB_PIK3CD	PIM1	1	1	0.19	4.73	78.59	0.15	0.99	34.07	43.6	breast	18.13	1.86
CAL148	PIK3CB_PIK3CD	PIM1	1	1	1	1.55	84.08	0.34	10	23.1	36.36	breast	15.33	-7.95
CAL51	PIK3CB_PIK3CD	PIM1	1	1	1	0	100	1	0	100	7.01	breast	11.08	-2.22
CAMA1	PIK3CB_PIK3CD	PIM1	1	1	1	0	100	0.17	1.87	20.1	52.92	breast	17.15	14.04
DU4475	PIK3CB_PIK3CD	PIM1	1	1	0.02	1.27	0	1	0.42	2.92	5.72	breast	31.24	5.76
HCC1143	PIK3CB_PIK3CD	PIM1	1	1	1	0	100	0.26	1.72	63.26	6.61	breast	18.19	9.6
HCC1187	PIK3CB_PIK3CD	PIM1	1	1	0.19	1.47	69.42	0.35	10	81.1	70.05	breast	33.63	1.75
HCC1395	PIK3CB_PIK3CD	PIM1	1	1	0.24	2.2	77.03	0.12	0.47	45.86	37.26	breast	17.66	4.5
HCC1428	PIK3CB_PIK3CD	PIM1	1	1	1	0.34	37.81	0	0.1	91.96	-15.67	breast	10.52	-9.8
HCC1806	PIK3CB_PIK3CD	PIM1	1	1	0.37	10	91.1	1	0	100	26	breast	27.05	7.98
HCC1937	PIK3CB_PIK3CD	PIM1	1	1	1	10	88.6	0.31	1.34	70.12	31.91	breast	14.8	8.29
HCC38	PIK3CB_PIK3CD	PIM1	1	1	1	0	100	1	10	59.6	20.28	breast	8.29	6.01
HCC70	PIK3CB_PIK3CD	PIM1	1	1	1	0	100	0.18	1.67	4.37	72.4	breast	13.84	12.07
HT1197	PIK3CB_PIK3CD	PIM1	3	3	1	0	100	1	0	100	69.97	urinary_tract	34.46	1.86
HT1376	PIK3CB_PIK3CD	PIM1	3	3	0.09	0.16	61.13	0.07	0.52	31.52	35.83	urinary_tract	14.91	14.57
J82	PIK3CB_PIK3CD	PIM1	3	3	3	0.1	53.2	1.66	0.38	0	14.63	urinary_tract	20.85	4.78
MDAMB157	PIK3CB_PIK3CD	PIM1	1	1	0.01	0.31	94.06	0.58	0.56	27.44	63.93	breast	28.59	1.86
MDAMB436	PIK3CB_PIK3CD	PIM1	1	1	0.11	10	94.3	0.26	1.03	64.22	31.48	breast	15.24	4.78
MDAMB453	PIK3CB_PIK3CD	PIM1	1	1	1	0.64	59.3	0.27	0.77	11.65	11.25	breast	18.11	8.45
MDAMB468	PIK3CB_PIK3CD	PIM1	1	1	1	0	100	1	10	83.4	47.65	breast	22.63	9.75
SW780	PIK3CB_PIK3CD	PIM1	3	3	1	0	100	1	0	100	-13.79	urinary_tract	14.06	-7.27
T24	PIK3CB_PIK3CD	PIM1	3	3	1	0	100	3	10	72.2	8.25	urinary_tract	11.11	1.86
TCCSUP	PIK3CB_PIK3CD	PIM1	3	3	3	0.52	65.04	1.37	0.71	37.4	46.67	urinary_tract	18.81	1.76
UMUC3	PIK3CB_PIK3CD	PIM1	3	3	1	0	100	3	10	70.6	0.98	urinary_tract	12.7	-2.95
647V	AKT	ATM	3	3	3	0.38	94.65	0.92	1.51	1.49	18.21	urinary_tract	9.19	5.9
BFTC905	AKT	ATM	3	3	0.96	10	76.7	0.25	2.51	59.64	70.73	urinary_tract	16.91	4.87
HT1197	AKT	ATM	3	1	0.66	10	93.85	0.13	1.87	54.04	7.86	urinary_tract	12.19	5.9
HT1376	AKT	ATM	3	3	0.94	10	76.6	0.12	0.52	18.45	3.34	urinary_tract	8.66	9.54
J82	AKT	ATM	3	3	0.61	1.02	48.73	1.58	0.6	0	-0.85	urinary_tract	11.23	5.67
SW780	AKT	ATM	3	3	1	0	100	0.29	1.5	24.54	-12.33	urinary_tract	1.94	3.3
T24	AKT	ATM	3	3	1.01	10	55.8	1	0	100	-0.8	urinary_tract	3.22	5.9
TCCSUP	AKT	ATM	3	3	3	0.4	61.33	0.11	0.53	46.96	19.89	urinary_tract	7.02	28.21
UMUC3	AKT	ATM	3	3	0.67	2.45	72.81	1.3	10	87.9	4.44	urinary_tract	10.19	7.43
647V	AKT	ATR_4	3	3	1.35	10	64.89	0.67	1.78	6.45	8.46	urinary_tract	-3.42	-1.59
BT20	AKT	ATR_4	1	1	1	1.4	3.14	0.18	2.98	79.49	-0.79	breast	4.9	14.58
CAL120	AKT	ATR_4	1	1	0.29	10	64.8	0.62	0.55	30.33	-14.48	breast	-4.34	-1.59
CAL51	AKT	ATR_4	1	1	0.28	3.83	3.55	0.59	1.14	26.1	-6.3	breast	-3.74	-5.16
CAMA1	AKT	ATR_4	1	1	1	10	23.6	0.13	1.57	15.03	-3.45	breast	-1.49	4.3
HCC1187	AKT	ATR_4	1	1	0.34	10	58.5	0.3	10	57	-23.98	breast	-2.38	-5.61
HCC1395	AKT	ATR_4	1	1	0.43	1.66	0	0.47	0.96	27.86	-1.07	breast	-5.67	15.96
HCC1428	AKT	ATR_4	1	1	1	0.59	26.08	1	0	100	-9.78	breast	-3.91	12.68
UMUC3	AKT	ATR_4	3	3	0.98	2.77	46.2	1.13	10	81.8	-0.91	urinary_tract	-2.9	-0.4
VMCUB1	AKT	ATR_4	3	3	3	10	33.2	3	0.16	32.09	-100.64	urinary_tract	-10.1	10.74
647V	AKT	CHEK1	1	3	0.95	10	0	0.66	1.67	5.68	18.53	urinary_tract	7.32	4.42
BFTC905	AKT	CHEK1	1	3	0.23	1.86	0	0.14	2.55	36.34	-41.03	urinary_tract	10.07	3.11
HT1197	AKT	CHEK1	1	1	0.22	3.92	36.33	0.21	2.36	59.84	-7.86	urinary_tract	7.14	4.42
HT1376	AKT	CHEK1	1	3	0.5	1.34	0	0.18	0.41	7.78	-0.59	urinary_tract	2.08	10.53
J82	AKT	CHEK1	1	3	0.35	2.92	47.46	0.47	1.83	43.3	-26.43	urinary_tract	8.79	4.74
T24	AKT	CHEK1	1	3	0.23	5.76	1.18	1	0	100	-5.33	urinary_tract	2.09	4.42
TCCSUP	AKT	CHEK1	1	3	0.25	4.99	6.72	0.28	0.81	54.52	-13.74	urinary_tract	3.51	28.89
UMUC3	AKT	CHEK1	1	3	0.35	10	38.4	1.68	1.84	70.83	-16.94	urinary_tract	3.05	3.92
VMCUB1	AKT	CHEK1	1	3	0.35	10	16	0.4	1.48	64.75	-24.39	urinary_tract	-5.23	10.77
HT1376	AKT	Cisplatin	3	3	0.9	0.94	16.8	0.22	0.76	26.17	3.55	urinary_tract	8.75	9.13
SW780	AKT	Cisplatin	3	3	2.5	1.82	55.32	0.29	2.44	30.16	-8.87	urinary_tract	-4.67	0.99
T24	AKT	Cisplatin	3	3	2.72	10	0	1	0	100	9.12	urinary_tract	11.15	5.62
647V	AKT	HDAC_4	3	3	1.06	10	29.5	0.81	1.51	5.38	-6.31	urinary_tract	-3.86	-4.95
BT474	AKT	HDAC_4	1	1	1	0	100	0.17	2.41	15.09	-24.24	breast	4.01	1.57
HT1197	AKT	HDAC_4	3	1	0.89	1.46	22.09	0.08	2.38	68.71	16.29	urinary_tract	-1.09	-4.95
MCF 7,00	AKT	HDAC_4	1	1	1	1.51	22.3	0.65	1.8	52.78	11.36	breast	4.29	5.13
T47D	AKT	HDAC_4	1	1	1	0	100	0.11	10	43.75	23.02	breast	-9.1	-0.68
647V	AKT	HSP90	3	3	0.16	4.78	4.64	0.9	1.51	2.31	-21.24	urinary_tract	9.68	6.55
BFTC905	AKT	HSP90	3	3	0.12	2.75	1.23	0.23	4.96	52.47	14.21	urinary_tract	21.93	5.39
BT474	AKT	HSP90	1	1	0.05	2.52	5.18	0.16	2.16	14.79	-2.35	breast	26.71	20.02
CAMA1	AKT	HSP90	1	1	0.16	2.38	15.58	0.16	1.27	15.41	-8.72	breast	13.18	9.46
HCC1419	AKT	HSP90	1	1	0.07	1.32	9.49	0.2	2.8	51.91	5.07	breast	20.65	16.21
HCC1500	AKT	HSP90	1	1	0.08	1.97	0	1	1.5	46.63	2.5	breast	11.97	-1.45
HT1197	AKT	HSP90	3	1	0.13	2.41	23.2	0.23	0.75	39.09	6.3	urinary_tract	15.47	6.55
HT1376	AKT	HSP90	3	3	0.09	1.98	15.26	0.28	0.31	0	7.75	urinary_tract	8.4	7.84
J82	AKT	HSP90	3	3	0.09	1.75	11.51	1.52	0.68	0	6.9	urinary_tract	14.98	4.36
MCF 7,00	AKT	HSP90	1	1	0.04	2.73	9.08	0.37	9.52	53.6	-0.59	breast	21.34	19.38
MDAMB175VII	AKT	HSP90	1	1	0.04	1.99	12.27	0.26	2.08	40.13	-28.37	breast	17.36	6.55
MDAMB361	AKT	HSP90	1	1	0.12	1.89	3.51	0.21	2.41	33.23	-4.52	breast	16.13	12.88
SW780	AKT	HSP90	0.3	3	0.24	3.85	0	0.24	2.17	28.38	-32.44	urinary_tract	12.49	9.11
T24	AKT	HSP90	0.3	3	0.09	10	7.1	1	0	100	-12.1	urinary_tract	7.65	6.55
T47D	AKT	HSP90	1	1	0.07	3.96	20.62	0.11	10	42.3	-1.57	breast	7.29	5.16
TCCSUP	AKT	HSP90	0.3	3	0.13	1.75	0	0.62	0.48	46.03	41.46	urinary_tract	8.93	30.83
UACC812	AKT	HSP90	1	1	0.04	10	0	0	0.1	94.05	3.87	breast	11.81	6.55
UMUC3	AKT	HSP90	0.3	3	0.11	10	12.69	1.17	10	85.8	2.71	urinary_tract	16.52	11.55
VMCUB1	AKT	HSP90	0.3	3	0.16	2.77	0	1.81	1.41	0	-33.08	urinary_tract	4.22	11.37
647V	AKT	IAP	3	3	0	1.61	6.9	0.73	1.63	3.3	0.62	urinary_tract	17.79	9.69
BFTC905	AKT	IAP	3	3	0	0.27	0	0.27	2.99	51.55	-13.87	urinary_tract	30.15	3.96
BT20	AKT	IAP	3	3	0.32	0.41	60.56	0.94	0.98	11.7	5.98	breast	33.55	17.19
BT474	AKT	IAP	3	3	1.12	10	57.4	0.18	1.56	5.4	-15.16	breast	37.39	16.83
CAMA1	AKT	IAP	3	3	0	0.12	0	0.05	0.52	0	11.07	breast	17.05	10.59
HCC1395	AKT	IAP	3	3	0.06	1.31	40.16	0.04	1.65	43.58	-9.08	breast	10.06	22.33
HCC1419	AKT	IAP	3	3	3	0.24	26.16	0.63	0.51	0	8.91	breast	28.28	16.25
HCC1569	AKT	IAP	3	3	3	0.1	26.17	0.82	0.41	0	6.99	breast	25.89	-0.5
HCC1954	AKT	IAP	3	3	0.05	0.29	0	0.21	0.39	0	11.89	breast	37.47	3.51
HCC70	AKT	IAP	3	3	1.32	0.99	2.56	0	0.1	14.33	-18.37	breast	11.16	3.15
HT1197	AKT	IAP	3	1	3	2.34	13.88	0.12	2.07	62.63	4.29	urinary_tract	21.67	9.69
HT1376	AKT	IAP	3	3	0.07	0.26	0	0.12	0.98	32.99	8.68	urinary_tract	14.32	6.1
J82	AKT	IAP	3	3	0.01	1.3	27.87	1.75	0.6	0	12.62	urinary_tract	16.02	3.32
MDAMB157	AKT	IAP	3	3	0.05	0.11	0	0.43	0.22	0	2.15	breast	19.91	9.69
MDAMB361	AKT	IAP	3	3	3	0.34	60.98	0.57	0.76	0	-16.27	breast	24.74	14.45
MDAMB415	AKT	IAP	3	3	0.04	1.76	21.05	0	0.35	9	-1.3	breast	14.01	-9.51
MDAMB436	AKT	IAP	3	3	0.03	10	73.2	2.79	0.27	0	-6.07	breast	7.78	-4.45
MDAMB453	AKT	IAP	3	3	3	0.21	22.09	3	0.34	0	-10.4	breast	10.13	11.33
SW780	AKT	IAP	0.03	3	0	2.13	67.16	0.41	2.32	31.83	50.93	urinary_tract	11.16	2.67
T24	AKT	IAP	1	3	0.19	1.34	84.43	1	0	100	-9.39	urinary_tract	19.05	9.69
T47D	AKT	IAP	3	3	0	7.51	77.34	0.09	0.86	22.54	11.34	breast	14.32	5.48
TCCSUP	AKT	IAP	0.03	3	0	1.12	77.92	0.46	0.54	50.77	20.63	urinary_tract	18.26	31.38
UMUC3	AKT	IAP	0.03	3	0	1.56	71.53	1.06	2.73	79.48	-16.09	urinary_tract	17.82	5.84
647V	AKT	MTOR_1	1	3	0.62	0.98	0	0.62	1.59	2.62	9.25	urinary_tract	17.43	4.85
BFTC905	AKT	MTOR_1	3	3	0.2	1.41	25.17	0.33	10	48.8	74.85	urinary_tract	30.16	-6.68
BT20	AKT	MTOR_1	1	3	0.1	1.42	29.66	1.37	0.9	0	33.75	breast	23.43	14.64
BT474	AKT	MTOR_1	1	3	0.13	4.72	28.69	0.23	1.8	7.43	27.3	breast	25.29	14.5
CAMA1	AKT	MTOR_1	1	3	0.16	2.2	17.26	0.04	0.49	0	21.02	breast	15.51	13.17
HCC1187	AKT	MTOR_1	1	3	1	0	100	1	0	100	-37.74	breast	9.92	-5.1
HCC1395	AKT	MTOR_1	1	3	1	0.59	35.16	0.05	1.39	47	-6.52	breast	10.12	5.82
HCC1419	AKT	MTOR_1	1	3	0.16	1.53	16.9	0.53	0.55	0	20.86	breast	24.96	7
HCC1569	AKT	MTOR_1	1	3	0	0.1	65.61	0	0.1	69.82	-14.22	breast	18.58	-4.82
HCC1954	AKT	MTOR_1	1	3	0.06	0.84	3.28	0.12	0.42	0	28.54	breast	35.13	12.41
HT1197	AKT	MTOR_1	3	1	1.59	0.76	12.39	0.2	1.69	61.33	20.66	urinary_tract	19.52	4.85
HT1376	AKT	MTOR_1	3	3	0.59	1.22	30.28	0.24	1.23	37.32	41.89	urinary_tract	12.95	13.29
J82	AKT	MTOR_1	3	3	0.9	0.71	0	1.05	0.81	19.69	18.52	urinary_tract	20.42	3.31
MCF 7,00	AKT	MTOR_1	1	3	0.03	1.28	9.83	0.6	0.75	0	6.59	breast	22.03	16.01
MDAMB157	AKT	MTOR_1	1	3	0.17	0.51	0	0.13	0.22	0	6.8	breast	17.54	4.85
MDAMB361	AKT	MTOR_1	1	3	0.17	2.63	38.76	0.65	1.47	18.03	50.99	breast	19.79	11.57
MDAMB415	AKT	MTOR_1	1	3	0.06	1.41	20.72	0	0.41	12.63	5.21	breast	11.63	-8.13
MDAMB436	AKT	MTOR_1	1	3	0.12	0.56	31.41	3	0.33	9.54	49.16	breast	2.94	-5.91
MDAMB453	AKT	MTOR_1	1	3	0.06	0.88	24.43	0.12	0.35	0	45.21	breast	9.9	7.86
SW780	AKT	MTOR_1	3	3	0.34	1.56	24.17	0.3	1.35	21.66	2.69	urinary_tract	12.41	6.45
T24	AKT	MTOR_1	3	3	0.97	10	18.1	1	0	100	-11.51	urinary_tract	14.23	4.85
T47D	AKT	MTOR_1	1	3	0.07	1.12	19.23	0.13	1.1	25.93	14	breast	12.82	8.49
TCCSUP	AKT	MTOR_1	1	3	0.77	0.73	0	0.38	0.6	49.52	23.49	urinary_tract	16.01	29.33
UMUC3	AKT	MTOR_1	1	3	1	1.8	25.88	3	1.67	47.1	29.92	urinary_tract	17.32	6.51
VMCUB1	AKT	MTOR_1	1	3	0.58	1.01	0	0.2	1.59	64.21	39.57	urinary_tract	8.55	11.96
647V	AKT	PARP1	3	3	3	0.91	68.4	0.62	1.5	2.49	21.82	urinary_tract	10.88	5.33
BFTC905	AKT	PARP1	3	3	3	0.69	39.82	0.19	1.37	41.56	39.24	urinary_tract	19.44	3.27
BT20	AKT	PARP1	3	1	3	1.61	66.79	0.44	10	74.99	20.6	breast	22.2	17.56
BT549	AKT	PARP1	3	1	3	0.95	35.42	0.51	0.81	25.55	18.27	breast	5.3	5.33
CAL120	AKT	PARP1	3	1	0.13	0.68	59.73	0.29	10	63.9	23.09	breast	8.35	5.33
CAL148	AKT	PARP1	3	1	3	0.88	51.42	0.21	2.17	4	51.65	breast	9.82	4.84
CAL51	AKT	PARP1	3	1	3	0.72	4.31	0.54	0.89	62.66	22.76	breast	-1.12	-5.68
CAMA1	AKT	PARP1	3	1	3	0.52	23.9	0.15	1.07	5.95	25.23	breast	12.13	8.46
DU4475	AKT	PARP1	3	1	0.29	1.67	37.02	1	10	29.2	39.03	breast	5.59	-2.62
HCC1143	AKT	PARP1	3	1	3	0.42	40.08	1	0.62	40.52	1.78	breast	5.08	1.03
HCC1187	AKT	PARP1	3	1	3	0.88	26.14	0.31	10	64.3	30.95	breast	8.74	-2.13
HCC1395	AKT	PARP1	3	1	0.13	0.46	5.57	0.36	1.19	38.48	18.04	breast	6.7	13.82
HCC1428	AKT	PARP1	3	1	1	10	50.4	1	0	100	-24.95	breast	4.09	4.12
HCC1806	AKT	PARP1	3	1	3	1.15	5.42	1	2.07	49.2	64.3	breast	7.33	-6.21
HCC1937	AKT	PARP1	3	1	1.22	1.6	79.75	0.17	2.25	74.6	20.21	breast	11.06	11.42
HCC38	AKT	PARP1	3	1	3	10	83.6	1	0	100	-1.15	breast	-0.62	-11.19
HCC70	AKT	PARP1	3	1	1	0	100	0.28	1.33	0	11.86	breast	10.14	2.55
HT1197	AKT	PARP1	3	1	0.15	1.16	56.02	0.05	1.28	53.26	1.77	urinary_tract	15.45	5.33
HT1376	AKT	PARP1	3	3	3	0.44	56.26	0.08	0.67	25.3	7.61	urinary_tract	8.5	5.97
J82	AKT	PARP1	3	3	3	0.6	61.01	0.89	0.77	17.08	8.34	urinary_tract	14.3	5.63
MDAMB157	AKT	PARP1	3	1	1.37	0.93	0	1	0.62	60.97	44.35	breast	12.26	5.33
MDAMB436	AKT	PARP1	3	1	0.05	0.37	5.97	1	0.86	32.51	20.07	breast	-0.35	-5.27
MDAMB453	AKT	PARP1	3	1	1.54	1.18	5.04	0.22	2.16	26.93	5.29	breast	13.05	13.04
MDAMB468	AKT	PARP1	3	1	1.82	1.8	0	0.4	2.07	40.08	31.24	breast	5.24	9.98
SW780	AKT	PARP1	3	3	3	10	91.2	0.34	1.54	25.45	11.55	urinary_tract	10.61	5.82
T24	AKT	PARP1	3	3	3	4.5	1.2	1	0	100	-30.91	urinary_tract	4.95	5.33
TCCSUP	AKT	PARP1	3	3	3	1.7	36.54	0.21	1.73	63.84	21.65	urinary_tract	9.35	27.1
UMUC3	AKT	PARP1	3	3	3	0.65	68.47	1.11	10	80.3	2.58	urinary_tract	12.46	9.96
VMCUB1	AKT	PARP1	3	3	3	1.33	87.41	1.04	1.95	26.08	-6.66	urinary_tract	2.02	15.78
647V	AKT	PIK3C	3	3	0.99	1.31	33.89	0.51	1.19	0	-3.25	urinary_tract	23.08	10.49
BFTC905	AKT	PIK3C	3	3	1.01	10	43.1	0.24	3.49	49.03	49.04	urinary_tract	29.27	10.49
BT474	AKT	PIK3C	3	3	0.42	1.29	0	0.18	1.72	5.42	4.73	breast	38.56	17.09
BT549	AKT	PIK3C	1	1	0.28	2.89	34.72	0.26	1.64	44.81	6.56	breast	16.5	10.49
CAL148	AKT	PIK3C	1	1	0.32	10	44.5	0.15	1.44	0	4.55	breast	14.47	1.88
CAL51	AKT	PIK3C	1	1	0.76	0.83	0	0.91	0.67	2.77	16.37	breast	19.08	-0.07
DU4475	AKT	PIK3C	1	1	0.15	2.73	0	0.36	10	38.1	26.78	breast	20.99	4.41
HCC1143	AKT	PIK3C	1	1	1	0.5	2.27	0.57	0.53	53.77	5.57	breast	7.03	-8.64
HCC1419	AKT	PIK3C	3	3	0.54	1.01	10.53	0.7	0.49	0	23.19	breast	31.06	17.64
HCC1428	AKT	PIK3C	1	1	0.01	4.93	83.23	0	0.1	93.15	-24.73	breast	-0.48	1.31
HCC1569	AKT	PIK3C	3	3	0.78	1.04	20.67	0.96	0.45	0	10.86	breast	21.42	-6.59
HCC1806	AKT	PIK3C	1	1	0.3	2.95	14.28	0.33	10	66.6	18.52	breast	47.76	19.19
HCC1937	AKT	PIK3C	1	1	0.27	1.21	62.2	0.15	1.06	68.4	6	breast	13.83	12.09
HCC1954	AKT	PIK3C	3	3	1.01	10	11.7	0.26	0.46	0	5.89	breast	53.14	-1.91
HCC38	AKT	PIK3C	1	1	0.27	10	80.3	0.37	10	80.4	-33.52	breast	-0.56	-4.53
HT1197	AKT	PIK3C	3	1	0.98	10	62	0.34	1.11	52.56	8.83	urinary_tract	19.85	10.49
HT1376	AKT	PIK3C	3	3	0.94	10	50.2	0.18	0.97	35.76	12.65	urinary_tract	17.83	10.43
J82	AKT	PIK3C	3	3	0.29	1.88	46.57	1.69	0.65	0	17.45	urinary_tract	18.74	12.89
MDAMB361	AKT	PIK3C	3	3	0.47	0.9	0	0.58	0.72	0	34.58	breast	39.25	18.49
MDAMB415	AKT	PIK3C	3	3	3	10	12.6	0	0.23	0	9.6	breast	7.19	-7.93
SW780	AKT	PIK3C	3	3	3	4.49	56.6	0.18	1.09	11.37	-149.84	urinary_tract	8.87	0.61
T24	AKT	PIK3C	3	3	3	10	20.6	1	0	100	-35	urinary_tract	16.27	10.49
T47D	AKT	PIK3C	3	3	0.16	0.89	16.36	0.1	0.87	23.03	-0.79	breast	17.02	7.44
TCCSUP	AKT	PIK3C	1	3	0.3	10	55.8	0.41	0.64	51.71	22.79	urinary_tract	17.02	19.45
UMUC3	AKT	PIK3C	3	3	1.54	1.52	20.79	1.03	10	80.5	5.02	urinary_tract	11.44	7.8
VMCUB1	AKT	PIK3C	3	3	0.13	10	33.73	0.03	10	57.2	-105.63	urinary_tract	21.22	20.8
647V	AKT	SRC	3	3	3	1.73	66.77	0.61	1.55	8.34	16.95	urinary_tract	7.09	5.31
BFTC905	AKT	SRC	1	3	1	10	58	0.24	4.51	53.2	1.36	urinary_tract	11.58	2.85
HT1197	AKT	SRC	3	1	1	0	100	1	0.46	24.4	-8.29	urinary_tract	10.05	5.31
HT1376	AKT	SRC	3	3	0.82	2.53	56.47	0.35	0.92	18.42	27.64	urinary_tract	12.48	9.2
J82	AKT	SRC	3	3	0.14	1.82	73.07	1.78	0.63	13	49.31	urinary_tract	11.88	8.01
T24	AKT	SRC	3	3	0.88	3.62	24.62	1	0	100	-20.9	urinary_tract	6.03	5.31
TCCSUP	AKT	SRC	3	3	0.78	0.87	57.72	0.29	0.93	64.44	38.98	urinary_tract	12.59	34.61
UMUC3	AKT	SRC	3	3	1.37	2.16	51.26	3	1.61	59.44	25.65	urinary_tract	11.38	4.02
HT1376	AKT	TNF	0.1	3	0	1.19	66.08	0.08	0.85	28.23	40.81	urinary_tract	15.78	10.09
TCCSUP	AKT	TNF	0.03	3	0	9.24	90.05	0.29	1.14	66.7	74.77	urinary_tract	24.81	33.89
VMCUB1	AKT	TNF	0.03	3	1	0	100	1.41	2.45	30.46	61.47	urinary_tract	14.98	17.33
647V	AKT	TNFSF10	0.03	3	1	0	100	0.58	1.39	4.59	1.87	urinary_tract	7.76	4.32
BFTC905	AKT	TNFSF10	0.03	3	0.02	1.68	30.48	0.21	1.15	38.37	57.07	urinary_tract	23.83	-0.33
HT1197	AKT	TNFSF10	0.03	1	1	0	100	1	0.48	17.02	5.5	urinary_tract	16.15	4.32
HT1376	AKT	TNFSF10	0.03	3	0.01	10	92.92	0.15	0.5	14.25	-13.01	urinary_tract	7.7	7.88
SW780	AKT	TNFSF10	0.03	3	0	4.8	0	0.25	1.72	23.88	-13.86	urinary_tract	10.52	7.42
T24	AKT	TNFSF10	0.03	3	0.01	10	57.6	1	0	100	-2.91	urinary_tract	3.31	4.32
TCCSUP	AKT	TNFSF10	0.03	3	0.01	10	56.8	0.34	1.09	65.8	50.16	urinary_tract	7.36	34.28
UMUC3	AKT	TNFSF10	0.03	3	1	0	100	1.14	10	79.8	-7.04	urinary_tract	14.13	5.98
647V	ATM	ATR_4	3	3	3	10	75.8	1	0	100	36.49	urinary_tract	-2.88	-0.62
BFTC905	ATM	ATR_4	3	3	0.83	1.54	0	3	0.72	21.66	20.52	urinary_tract	-2.84	-1.21
HT1197	ATM	ATR_4	3	3	0.97	10	65.3	0.37	10	89	-14.38	urinary_tract	-2.45	-0.62
J82	ATM	ATR_4	3	3	0.98	10	51.3	0.48	2.87	81.67	32.31	urinary_tract	-7.68	-15.86
KU1919	ATM	ATR_4	3	3	2.75	10	0	1	0	100	49.34	urinary_tract	-4.84	0.89
T24	ATM	ATR_4	3	3	1.11	10	10.7	0.82	4.16	68.76	89.08	urinary_tract	-7.55	-0.62
TCCSUP	ATM	ATR_4	3	3	0.74	2.42	26.07	3	0.29	51.56	21.51	urinary_tract	-2.14	13.08
UMUC3	ATM	ATR_4	3	3	1.12	2.8	51.29	0.74	1.57	72.7	55.77	urinary_tract	-2.37	-2.29
VMCUB1	ATM	ATR_4	3	3	3	10	59	0	0.1	94.71	24.85	urinary_tract	-13.48	-8.99
647V	ATM	BCL2_BCL2L1	3	3	2.08	0.77	29.84	1	0	100	7.95	urinary_tract	9.17	12.99
BFTC905	ATM	BCL2_BCL2L1	3	3	3	0.47	19.5	3	0.53	34.02	21.95	urinary_tract	10.94	17.63
HT1197	ATM	BCL2_BCL2L1	3	3	0.18	10	93.11	1.07	2.98	85.37	-15.03	urinary_tract	12.56	12.99
HT1376	ATM	BCL2_BCL2L1	3	3	0.69	0.99	44.58	1	0	100	6.21	urinary_tract	3.98	-9.54
J82	ATM	BCL2_BCL2L1	3	3	3	0.61	59.76	0.4	4.76	80.97	23.05	urinary_tract	-6.2	-18.12
KU1919	ATM	BCL2_BCL2L1	3	3	3	1.33	32.3	1	0	100	-11.79	urinary_tract	6.95	9.41
SW780	ATM	BCL2_BCL2L1	0.3	3	0.02	1.18	27.09	1	0	100	-35.55	urinary_tract	5.07	13.77
T24	ATM	BCL2_BCL2L1	0.3	3	0.3	0.79	80.53	1.03	10	67	18.94	urinary_tract	1.65	12.99
TCCSUP	ATM	BCL2_BCL2L1	3	3	1	0	100	0.51	3.22	84.07	0.62	urinary_tract	4.89	-7.76
UMUC3	ATM	BCL2_BCL2L1	3	3	0.76	0.89	38.48	0.49	3	77.04	43.41	urinary_tract	11.42	12.9
VMCUB1	ATM	BCL2_BCL2L1	3	3	0.44	0.92	80.75	1	0	100	22.06	urinary_tract	1.39	16.66
647V	ATM	CHEK1	1	3	0.41	10	35.79	1.1	10	92.4	-10.98	urinary_tract	3.78	4.64
BFTC905	ATM	CHEK1	1	3	0.15	1.6	0	0.72	0.48	27.53	-49.75	urinary_tract	4.62	4.58
HT1376	ATM	CHEK1	1	3	0.31	10	30.8	3	0.68	76.96	-22.11	urinary_tract	0.34	5.33
J82	ATM	CHEK1	1	3	0.3	10	55.5	0.47	1.39	63.72	-4.83	urinary_tract	1.62	5.78
T24	ATM	CHEK1	1	3	0.26	10	1.6	1	10	63.6	9.76	urinary_tract	0.89	4.64
TCCSUP	ATM	CHEK1	1	3	0.19	2.93	6.19	0.7	2.47	81.85	8.38	urinary_tract	-0.4	9.36
UMUC3	ATM	CHEK1	1	3	0.37	10	37.3	0.71	3.01	69.7	11.06	urinary_tract	-0.73	4.24
VMCUB1	ATM	CHEK1	1	3	0.38	10	29.1	1	0	100	-0.53	urinary_tract	-5.52	0.14
647V	ATM	Cisplatin	3	3	1.25	2.95	0	3	0.44	83.06	12.12	urinary_tract	12.13	8.02
BFTC905	ATM	Cisplatin	3	3	0.66	2.73	4.4	0.95	10	80.3	24.4	urinary_tract	8.59	8.34
J82	ATM	Cisplatin	3	3	0.48	1.09	0	0.49	10	70.89	22.14	urinary_tract	11.53	6.72
SW780	ATM	Cisplatin	3	3	1.15	10	70.5	1	0	100	-18.55	urinary_tract	0.93	-8.47
TCCSUP	ATM	Cisplatin	3	3	0.48	2.07	12.77	0.53	10	87.59	41.11	urinary_tract	16	12.87
UMUC3	ATM	Cisplatin	3	3	1.26	2.47	0	0.51	2.34	73.18	47.05	urinary_tract	19.59	7.99
647V	ATM	EG5	3	3	0	9.55	10.61	3	1.64	86.76	-7.78	urinary_tract	4.26	7.88
BFTC905	ATM	EG5	3	3	0	3.58	0	3	0.76	17.3	-8.64	urinary_tract	6.07	5.8
HT1376	ATM	EG5	0.1	3	0	2.93	27.7	3	0.41	57.85	-1.84	urinary_tract	1.28	8.45
J82	ATM	EG5	3	3	0	0.1	0	0.5	2.34	82.34	-9.7	urinary_tract	2.8	-1.94
SW780	ATM	EG5	3	3	0	10	94.8	1	0	100	-15.11	urinary_tract	-5.38	-1.67
T24	ATM	EG5	3	3	0	1.29	1.07	1.03	10	59.2	-0.32	urinary_tract	2.03	7.88
TCCSUP	ATM	EG5	3	3	0	10	29.66	0.51	10	86.69	-10.24	urinary_tract	3.85	3.84
UMUC3	ATM	EG5	3	3	0	2.77	71.81	0.49	2.59	78.87	-4.65	urinary_tract	2.76	7.29
647V	ATM	ERBB	0.1	3	0.06	1.12	67.91	3	0.86	92.01	6.04	urinary_tract	11.46	0.14
BFTC905	ATM	ERBB	3	3	1.05	10	69.7	0.74	3.98	58.76	23.17	urinary_tract	29.62	-0.54
HT1197	ATM	ERBB	3	3	1	0	100	0.65	10	91.14	17.03	urinary_tract	5.39	0.14
HT1376	ATM	ERBB	1	3	0.43	0.32	0	0	0.1	83.74	-3.93	urinary_tract	11.58	-11.42
J82	ATM	ERBB	3	3	0.06	10	91.07	0.86	2.86	71	14.21	urinary_tract	15.68	26.24
T24	ATM	ERBB	3	3	3	2.51	59.81	0.96	10	59.9	-7.75	urinary_tract	-1.93	0.14
TCCSUP	ATM	ERBB	3	3	0.02	2.15	92.8	0.93	10	85.8	24.41	urinary_tract	14.41	12.93
UMUC3	ATM	ERBB	3	3	1.37	10	75.59	0.93	3.29	73.76	13.35	urinary_tract	-0.36	-1.22
647V	ATM	FGFR	3	3	1	0	100	1	0	100	-11.56	urinary_tract	-4.56	3.47
BFTC905	ATM	FGFR	3	3	3	1.59	46.92	0.98	10	70.2	20.59	urinary_tract	-10.95	7.43
HT1197	ATM	FGFR	3	3	3	0.27	36.43	0.56	10	75.84	-18.64	urinary_tract	-4	3.47
HT1376	ATM	FGFR	3	3	3	0.15	34.81	0	0.1	71.58	-6.91	urinary_tract	-1.74	-1.24
J82	ATM	FGFR	3	3	0.06	2.42	70.35	0.83	10	73.5	15.58	urinary_tract	5.75	19.45
T24	ATM	FGFR	3	3	1	0	100	1.21	10	74.4	-22.94	urinary_tract	-3.78	3.47
TCCSUP	ATM	FGFR	3	3	0.03	2.14	59.79	0.68	1.09	83.56	19.33	urinary_tract	13.71	13.03
UMUC3	ATM	FGFR	3	3	1	0	100	0.9	10	78	3.68	urinary_tract	-2.16	3.32
VMCUB1	ATM	FGFR	3	3	0.14	10	80.97	0.43	10	72.55	-61.39	urinary_tract	-3.85	6.33
BFTC905	ATM	Gemcitabine	0.1	3	0	4.97	1.27	1.19	1.42	45.13	2.02	urinary_tract	4.17	6.04
HT1376	ATM	Gemcitabine	0.1	3	0	1.64	20.17	0.31	10	82	-9.29	urinary_tract	-1.48	-7.09
UMUC3	ATM	Gemcitabine	0.1	3	0.01	2.86	1.51	0.94	10	77	5.75	urinary_tract	6.29	5.28
647V	ATM	HDAC_4	3	3	1.36	1.65	0	3	0.23	87.32	-3.7	urinary_tract	-5.57	-6.93
BFTC905	ATM	HDAC_4	3	3	0.5	1.43	9.52	3	0.85	29.26	28.5	urinary_tract	-4.45	-5.56
HT1197	ATM	HDAC_4	3	3	0.78	1.92	23.02	0.62	10	94.19	-7.73	urinary_tract	-5.01	-6.93
HT1376	ATM	HDAC_4	3	3	0.81	1.01	0	3	0.86	53.05	2.93	urinary_tract	-10.97	-7.59
J82	ATM	HDAC_4	3	3	1.05	10	31.8	0.92	10	86.9	13.09	urinary_tract	-2.17	3.76
SW780	ATM	HDAC_4	3	3	1.27	0.61	0	1	0	100	17.48	urinary_tract	-5.36	1.43
T24	ATM	HDAC_4	3	3	1.21	10	16.69	0.91	10	74.1	0.1	urinary_tract	-8.06	-6.93
TCCSUP	ATM	HDAC_4	3	3	0.6	0.95	0	1.34	1.29	77.12	8.38	urinary_tract	1.25	10.41
UMUC3	ATM	HDAC_4	3	3	2.01	2.4	2.2	0.57	2.85	74.24	1.28	urinary_tract	-0.65	-6.93
VMCUB1	ATM	HDAC_4	3	3	2.84	2.82	0	1	0	100	59.75	urinary_tract	-5.46	-5.14
647V	ATM	HSP90	3	3	0.15	3.76	4.35	3	0.39	89.71	6.39	urinary_tract	6.63	8.02
BFTC905	ATM	HSP90	3	3	0.12	2.37	0.97	3	0.51	35.71	14.23	urinary_tract	8.88	6.47
HT1376	ATM	HSP90	3	3	0.06	1.4	7.26	3	0.33	45.1	5.54	urinary_tract	4.06	3.33
J82	ATM	HSP90	3	3	0.1	1.79	20.25	0.28	10	80.35	-7.86	urinary_tract	5.5	9.4
SW780	ATM	HSP90	0.3	3	0.17	3.08	31.88	1	0	100	6.5	urinary_tract	-2.11	5.03
T24	ATM	HSP90	0.3	3	0.1	10	9.1	1.06	10	73	9.45	urinary_tract	6.16	8.02
TCCSUP	ATM	HSP90	0.3	3	0.17	1.62	0	3	0.19	49.16	5.5	urinary_tract	6.66	9.41
UMUC3	ATM	HSP90	0.3	3	0.12	10	18.09	0.72	1.64	66.7	-2.44	urinary_tract	7.27	9.34
VMCUB1	ATM	HSP90	0.3	3	0.15	2.4	0	1	0	100	5.26	urinary_tract	-2.04	-1.87
647V	ATM	MAP2K_1	1	3	0.29	2.18	77.11	1	0	100	4.9	urinary_tract	11.02	8.53
BFTC905	ATM	MAP2K_1	3	3	0.97	3.13	30.31	2.71	1.18	35.09	18.93	urinary_tract	13.43	11.48
HT1197	ATM	MAP2K_1	1	3	0.11	10	72.95	0.89	2.38	68.88	-22.8	urinary_tract	10.66	8.53
HT1376	ATM	MAP2K_1	3	3	1.01	0.59	0	3	10	22.8	48.52	urinary_tract	9.45	7.87
J82	ATM	MAP2K_1	3	3	0.89	0.31	41.41	0.48	3.84	75.59	18.51	urinary_tract	11.4	4.51
SW780	ATM	MAP2K_1	3	3	1.05	3.71	53.47	1	0	100	-43.85	urinary_tract	8.91	5.89
T24	ATM	MAP2K_1	3	3	0.44	0.91	14.16	1	10	63.1	26.08	urinary_tract	9.83	8.53
TCCSUP	ATM	MAP2K_1	3	3	3	0.43	19.49	0.81	2.07	82.38	5.98	urinary_tract	6.83	2.7
VMCUB1	ATM	MAP2K_1	3	3	1.56	0.73	52.6	3	0.31	92.09	11.13	urinary_tract	6.41	9.34
647V	ATM	MTOR_1	1	3	0.89	1.43	0	1	0	100	-0.2	urinary_tract	9.89	6.6
BFTC905	ATM	MTOR_1	3	3	0.23	1.62	26.32	0.55	2.52	70.52	10.57	urinary_tract	14.24	3.89
HT1197	ATM	MTOR_1	3	3	1.41	0.64	0	2.19	0.72	63.83	32.85	urinary_tract	8.65	6.6
HT1376	ATM	MTOR_1	3	3	0.93	0.78	7.08	0.26	10	81.5	-10.47	urinary_tract	5.79	16.11
J82	ATM	MTOR_1	3	3	0.61	0.7	8.24	0.66	10	71.75	-21.31	urinary_tract	5.94	4.83
SW780	ATM	MTOR_1	3	3	0.57	2.01	30.37	1	0	100	-26.47	urinary_tract	-2.87	-3.97
T24	ATM	MTOR_1	3	3	0.83	2.32	14.05	3	0.93	18.78	4.39	urinary_tract	6.9	6.6
TCCSUP	ATM	MTOR_1	1	3	0.51	0.96	29.02	0.33	10	84.15	3.61	urinary_tract	8.71	9.22
UMUC3	ATM	MTOR_1	1	3	1	1.82	41.63	0.59	1.47	70.37	-9.3	urinary_tract	5.6	5.7
647V	ATM	PARP1	3	3	3	2.04	87.82	1	0	100	41.35	urinary_tract	6.38	7.5
BFTC905	ATM	PARP1	3	3	0	0.11	44.14	0.71	0.93	53.38	13.85	urinary_tract	7.2	5.53
HT1197	ATM	PARP1	3	3	3	0.93	10.29	0.28	10	84.35	52.61	urinary_tract	5.79	7.5
HT1376	ATM	PARP1	3	3	3	0.11	12.44	3	0.19	22.36	-23.49	urinary_tract	1.5	3.25
J82	ATM	PARP1	3	3	0.52	2.81	83.63	1.04	2.66	77.74	40.92	urinary_tract	3.37	7.74
KU1919	ATM	PARP1	3	3	1	0	100	1	0	100	53.03	urinary_tract	3.91	7.07
SW780	ATM	PARP1	3	3	1	0	100	1	0	100	-30.25	urinary_tract	-3.17	1.93
T24	ATM	PARP1	3	3	3	1.91	18.44	1.19	1.43	51.41	129.45	urinary_tract	2.6	7.5
TCCSUP	ATM	PARP1	3	3	3	0.46	32.32	3	0.11	68.08	46.46	urinary_tract	3.7	11.97
UMUC3	ATM	PARP1	3	3	3	0.41	84.06	0.49	1.78	77.63	89.15	urinary_tract	6.02	6.78
VMCUB1	ATM	PARP1	3	3	0.12	10	62.73	1	0	100	-17.03	urinary_tract	-3.46	3.92
647V	ATM	PIK3C	3	3	1.19	1.77	38.45	3	10	88.8	-0.79	urinary_tract	7.93	2.28
BFTC905	ATM	PIK3C	3	3	1.15	0.75	0	0.48	1.03	49.65	23.14	urinary_tract	15.74	2.28
HT1197	ATM	PIK3C	3	3	3	0.68	13.3	0.36	10	89.65	19.35	urinary_tract	6.63	2.28
HT1376	ATM	PIK3C	3	3	1.22	0.59	0	1.35	0.78	70.69	2.75	urinary_tract	1.61	2.79
J82	ATM	PIK3C	3	3	1.31	0.59	0	0.43	2.76	64.48	-9.88	urinary_tract	7.07	15.69
SW780	ATM	PIK3C	3	3	3	10	82.6	1	0	100	-43.61	urinary_tract	-4.83	-14.92
T24	ATM	PIK3C	3	3	1.02	10	41.6	0.77	2.37	59.7	12.99	urinary_tract	-2.79	2.28
TCCSUP	ATM	PIK3C	1	3	0.48	1.77	46.51	0.97	10	88.7	15.23	urinary_tract	7.14	5.03
UMUC3	ATM	PIK3C	3	3	1.52	1.7	27.34	0.61	2.22	71.96	-1.45	urinary_tract	2.92	-0.69
VMCUB1	ATM	PIK3C	3	3	1.57	1.71	29.52	0.3	10	92.35	0.95	urinary_tract	6.2	14.09
647V	ATM	PIK3CB_PIK3CD	3	3	0.83	1.47	11.84	1	0	100	21.79	urinary_tract	5.68	4.43
BFTC905	ATM	PIK3CB_PIK3CD	3	3	0.33	2.29	28.61	0.72	1.61	66.92	35	urinary_tract	10.26	4.63
HT1197	ATM	PIK3CB_PIK3CD	3	3	3	0.2	64.01	3	0.29	47.72	3.84	urinary_tract	17.68	4.43
HT1376	ATM	PIK3CB_PIK3CD	3	3	1.53	0.58	0	1	0	100	11.27	urinary_tract	10.69	14.89
J82	ATM	PIK3CB_PIK3CD	3	3	2.23	0.56	0	0.46	2.41	65.19	13.75	urinary_tract	8.17	2.31
SW780	ATM	PIK3CB_PIK3CD	3	3	1	0	100	1	0	100	-52.14	urinary_tract	-8.16	-1.8
T24	ATM	PIK3CB_PIK3CD	3	3	1.49	10	83.99	0.81	3.09	61.14	26.86	urinary_tract	2.99	4.43
TCCSUP	ATM	PIK3CB_PIK3CD	3	3	3	0.75	23.25	0.66	3.42	84.96	16.14	urinary_tract	8.79	8.35
UMUC3	ATM	PIK3CB_PIK3CD	3	3	0.99	10	81.2	0.78	1.31	66.51	8.32	urinary_tract	2.28	0.07
VMCUB1	ATM	PIK3CB_PIK3CD	3	3	3	1.27	59.16	0.08	0.59	93.45	10.69	urinary_tract	2.9	5.46
647V	ATM	PIM1	3	3	1	0	100	3	0.18	92.34	-4.96	urinary_tract	17.03	9.36
BFTC905	ATM	PIM1	3	3	0.97	2.62	87.08	0.28	0.68	66.09	141.59	urinary_tract	23.64	11.28
HT1197	ATM	PIM1	3	3	0.03	10	90.75	0.5	2.01	91.15	32.88	urinary_tract	22.81	9.36
HT1376	ATM	PIM1	3	3	0.02	1.47	67.62	3	0.19	86.02	-24.71	urinary_tract	9.39	9.36
J82	ATM	PIM1	3	3	0.03	0.93	77.38	0.43	1.93	77.35	19.55	urinary_tract	5.2	-3.47
SW780	ATM	PIM1	3	3	1	0	100	1	0	100	-31.88	urinary_tract	3.82	-10.08
T24	ATM	PIM1	3	3	3	10	88.4	3	0.8	17.22	-8.4	urinary_tract	7.34	9.36
TCCSUP	ATM	PIM1	3	3	0.17	0.99	82.31	1.42	0.67	79.93	16.32	urinary_tract	9.91	8.1
UMUC3	ATM	PIM1	3	3	1	0	100	1.15	1.4	64.05	-4.31	urinary_tract	6.54	6.07
647V	ATM	SRC	3	3	3	10	69	0.66	0.53	94.76	1.52	urinary_tract	5.6	6.82
BFTC905	ATM	SRC	1	3	1	0	100	0.74	1.98	63.51	-4.23	urinary_tract	7.15	6.82
J82	ATM	SRC	3	3	3	0.48	42.15	0.46	2.54	71.79	19.38	urinary_tract	6.32	5.68
T24	ATM	SRC	3	3	0.75	2.32	26.87	3	0.91	32.03	3.76	urinary_tract	3.65	6.82
UMUC3	ATM	SRC	3	3	1.14	10	63.5	0.58	2.93	72.08	-10.77	urinary_tract	6.56	6.82
BT20	ATR_4	BCL2_BCL2L1	1	1	1	1.51	51.97	1	1.64	12.63	-1.16	breast	5.75	6.94
BT549	ATR_4	BCL2_BCL2L1	1	1	0.25	1.23	70.59	1	10	31	-28.36	breast	-1.22	6.43
CAL148	ATR_4	BCL2_BCL2L1	1	1	0.25	2.43	38.81	0.38	10	51.8	5.19	breast	7.46	18.38
DU4475	ATR_4	BCL2_BCL2L1	1	1	0	7.83	0.16	0.1	1.71	0	-0.08	breast	1.19	1.03
HCC1806	ATR_4	BCL2_BCL2L1	1	1	1	0	100	0.33	10	10.9	8.51	breast	1.65	-5.18
HCC1937	ATR_4	BCL2_BCL2L1	1	1	1	0.77	44.97	1	0	100	-21.5	breast	2.57	5.25
MDAMB157	ATR_4	BCL2_BCL2L1	1	1	1	0.77	57.48	0.32	10	38.5	-14.16	breast	8.42	6.43
MDAMB436	ATR_4	BCL2_BCL2L1	1	1	0.32	10	85.5	0.32	10	63.4	-12.28	breast	0.2	2.58
T24	ATR_4	BCL2_BCL2L1	0.3	3	1	0	100	1.11	10	12.7	13.25	urinary_tract	-3.89	6.43
647V	ATR_4	CHEK1	1	3	0.97	10	0	1.29	10	77	66.19	urinary_tract	-5.04	-1.45
A549	ATR_4	CHEK1	1	3	0.81	1.74	0	1.44	10	44.76	50.44	lung	-4.03	0.54
BT20	ATR_4	CHEK1	1	3	0.39	10	64	1.35	2.44	37.43	51.03	breast	-2.07	1.14
BT474	ATR_4	CHEK1	1	3	0.31	10	28.7	1.42	10	57.78	43.82	breast	-2.05	-8.16
CAMA1	ATR_4	CHEK1	1	3	0.33	3.19	32.1	3	10	52	55.63	breast	-10.38	4.16
DMS114	ATR_4	CHEK1	1	3	0.27	10	18.4	1.01	10	49.5	45.44	lung	-6.35	8.64
HCC1419	ATR_4	CHEK1	1	3	0.24	2.13	27.52	3	1.02	27.69	31.56	breast	-7.03	4.09
HCC1569	ATR_4	CHEK1	1	3	0.08	0.76	5.12	2.8	0.55	0	23.73	breast	-4.29	-8.39
HCC1954	ATR_4	CHEK1	1	3	0.2	2.3	2.98	1.85	1.56	0	59.75	breast	2.04	-20.51
HCC70	ATR_4	CHEK1	1	3	1	10	68.6	0.18	2.31	7.2	31.89	breast	-12.41	2.07
HT1197	ATR_4	CHEK1	1	3	0.26	3.15	27.43	1.06	10	64.3	38.58	urinary_tract	-5.51	-1.45
HT1376	ATR_4	CHEK1	1	3	0.32	2.21	29.34	0.95	10	43	29.29	urinary_tract	-10.73	4.65
J82	ATR_4	CHEK1	1	3	0.34	10	38.1	0.95	10	38.9	13.93	urinary_tract	-7.98	-17.08
MCF 7,00	ATR_4	CHEK1	1	3	0.07	1.77	24.93	0.24	1.94	14.25	13.01	breast	7.3	-0.1
MDAMB157	ATR_4	CHEK1	1	3	0.22	1.15	2.23	2.31	0.9	0	31.25	breast	-4.53	-1.45
MDAMB361	ATR_4	CHEK1	1	3	0.05	1.38	34.81	2.88	1	0	15.9	breast	1.58	-8.56
MDAMB415	ATR_4	CHEK1	1	3	0.38	10	38.8	1.1	10	72.2	36.03	breast	-7.96	-4.43
MDAMB436	ATR_4	CHEK1	1	3	0.17	1.74	20.39	0.68	1.33	41.94	47.72	breast	-8.73	1.39
MDAMB453	ATR_4	CHEK1	1	3	0.11	1.15	3.63	0.67	1.51	3.41	42.89	breast	-11.86	-19.09
MDAMB468	ATR_4	CHEK1	1	3	0.23	1.2	0	1.01	0.77	0	33.28	breast	-8.71	2.94
NCIH1299	ATR_4	CHEK1	1	3	0.29	10	11.1	1.17	10	35.89	71.75	lung	10.15	-1.45
NCIH1437	ATR_4	CHEK1	1	3	1	1.93	3.1	3	1.58	39.45	45.69	lung	-7.97	-8.19
NCIH1703	ATR_4	CHEK1	0.1	3	0.01	1.26	16.58	0.5	2.04	13.81	8.76	lung	-9.32	-10.17
NCIH1793	ATR_4	CHEK1	1	3	0.21	3.93	7.6	1.14	3.21	57.77	63.01	lung	28.13	15.93
NCIH1975	ATR_4	CHEK1	1	3	1	1.04	1.95	1.23	3.86	75.44	12.78	lung	-8.6	4.09
NCIH2170	ATR_4	CHEK1	1	3	0.33	10	18.4	1.01	10	74.2	78.39	lung	-15.81	-9.62
NCIH2228	ATR_4	CHEK1	1	3	0.21	1.53	4.68	2.33	0.96	0	25.53	lung	-2.69	-1.45
NCIH226	ATR_4	CHEK1	1	3	0.33	3.09	20.54	0.96	2.24	34.43	17.48	lung	-5.08	-1.45
NCIH2291	ATR_4	CHEK1	1	3	0.2	2	14.63	2.35	1.91	0	59.02	lung	-1.44	6.35
NCIH23	ATR_4	CHEK1	1	3	0.23	4.08	13.11	0.67	2.71	21.41	42.18	lung	0.37	-9.15
NCIH3122	ATR_4	CHEK1	1	3	0.24	2.34	0	0.87	1.46	0	16.22	lung	-8.48	-1.45
NCIH358	ATR_4	CHEK1	1	3	0.37	10	25	3	2.21	24.22	75.02	lung	-0.27	-0.66
NCIH520	ATR_4	CHEK1	1	3	0.29	2.99	24.19	1.09	10	73.1	48.71	lung	-12.31	-9.34
NCIH522	ATR_4	CHEK1	1	3	0.41	10	45.59	1.09	10	63.7	39.99	lung	1.94	-3.12
NCIH838	ATR_4	CHEK1	1	3	0.2	3.18	3.97	1.09	2.81	7.37	56.69	lung	9.59	-1.52
SW900	ATR_4	CHEK1	1	3	0.24	2.01	16.21	0.95	1.83	32.77	50.37	lung	-4.21	-3.39
T24	ATR_4	CHEK1	1	3	0.26	10	1.2	1.04	10	8.2	59.26	urinary_tract	-8.92	-1.45
TCCSUP	ATR_4	CHEK1	1	3	0.18	2.77	5.26	0.74	2.65	19.73	56.14	urinary_tract	-7.12	10.06
UMUC3	ATR_4	CHEK1	1	3	0.39	10	43	1.01	10	51.4	77.55	urinary_tract	-7.6	-2.23
VMCUB1	ATR_4	CHEK1	1	3	0.01	0.24	0	0.6	10	0	-139.76	urinary_tract	-19.21	-14.9
647V	ATR_4	Cisplatin	3	3	1.2	3.43	0	1.22	10	59.3	84.59	urinary_tract	12.13	2.33
BFTC905	ATR_4	Cisplatin	3	3	0.69	2.07	0.16	0.98	10	12.7	37.5	urinary_tract	8.59	4.37
HT1197	ATR_4	Cisplatin	3	3	1.07	1.53	32.96	3	10	43.2	4.1	urinary_tract	11.86	2.33
HT1376	ATR_4	Cisplatin	3	3	1.32	0.62	0	1.06	10	44.4	-46.21	urinary_tract	10.34	3.23
J82	ATR_4	Cisplatin	3	3	0.47	1.38	2.3	0.89	4.37	45.33	62.56	urinary_tract	11.53	-21.41
SW780	ATR_4	Cisplatin	3	3	3	1.69	45.47	3	10	70.2	64.62	urinary_tract	0.93	-9.76
T24	ATR_4	Cisplatin	3	3	2.37	4.62	0	0.97	10	8.7	6.52	urinary_tract	16.97	2.33
TCCSUP	ATR_4	Cisplatin	3	3	0.5	2.13	12.39	0.76	2.1	15.85	41.66	urinary_tract	16	15.92
UMUC3	ATR_4	Cisplatin	3	3	1.23	2.24	0	1.08	2.56	41.42	54.75	urinary_tract	19.59	3.61
647V	ATR_4	EG5	3	3	0	10	0	3	10	51	-3.55	urinary_tract	-11	1.95
BFTC905	ATR_4	EG5	3	3	0	3.39	0	1.16	1.9	0	-19.16	urinary_tract	-11.06	1.56
HT1197	ATR_4	EG5	3	3	0	0.1	38.42	3	10	20.4	1.26	urinary_tract	-9.58	1.95
J82	ATR_4	EG5	3	3	0	0.1	0	1.11	10	55.5	-6.27	urinary_tract	-15.19	-15.67
SW780	ATR_4	EG5	3	3	1	0	100	3	10	91	-12.11	urinary_tract	-16.7	-6.7
T24	ATR_4	EG5	3	3	0	8.64	1.18	1.09	10	10.5	1.08	urinary_tract	-16.31	1.95
TCCSUP	ATR_4	EG5	3	3	0	3	0	0.68	2	16.14	-18.57	urinary_tract	-7.09	11.26
UMUC3	ATR_4	EG5	3	3	0	10	84.26	1	10	55.1	3.04	urinary_tract	-9.2	1.05
647V	ATR_4	ERBB	0.1	3	0.1	1.31	69.67	1.21	10	60.5	-17.2	urinary_tract	9.53	4.56
BFTC905	ATR_4	ERBB	3	3	0.29	8.13	92.4	1.12	1.96	0	19.73	urinary_tract	27.08	7.34
HT1197	ATR_4	ERBB	3	3	0	0.1	82.47	3	2.31	0.25	-5.09	urinary_tract	3.33	4.56
HT1376	ATR_4	ERBB	1	3	0.08	0.99	45.51	1.08	10	40.4	-36.05	urinary_tract	8.8	-6.12
J82	ATR_4	ERBB	3	3	0.04	10	90.42	1.91	1.65	0	13.21	urinary_tract	14.04	-1.38
SW780	ATR_4	ERBB	3	3	1	0	100	3	10	84.8	-44.94	urinary_tract	-28.49	-31.68
T24	ATR_4	ERBB	3	3	3	2.71	63.41	0.98	10	8.8	-9.38	urinary_tract	-3.53	4.56
TCCSUP	ATR_4	ERBB	3	3	0.1	0.43	80.64	0.69	1.76	13.19	-2.71	urinary_tract	12.06	12.23
UMUC3	ATR_4	ERBB	3	3	1.89	3.75	74.02	0.99	10	54.1	-0.89	urinary_tract	-0.99	-0.18
647V	ATR_4	FGFR	3	3	1	0	100	2.92	9.99	56.45	-8.4	urinary_tract	-8.08	3.07
BFTC905	ATR_4	FGFR	3	3	3	1.53	39.59	1.06	10	18.5	10.07	urinary_tract	-14.65	1.4
BT20	ATR_4	FGFR	1	1	0.27	10	89.2	0.4	10	47.39	8.84	breast	-0.93	5.19
BT549	ATR_4	FGFR	1	1	0.11	0.77	58.37	1	10	38.4	-38.96	breast	-12.11	3.07
CAL120	ATR_4	FGFR	1	1	1	0.38	49.66	0.31	10	62.4	6.94	breast	-3.86	3.07
CAL148	ATR_4	FGFR	1	1	1	0	100	0.38	10	59.3	-6.18	breast	-9.24	-13.58
CAL51	ATR_4	FGFR	1	1	0.22	1.73	77.8	0.28	2.6	0	21.34	breast	-5.17	4.8
CAMA1	ATR_4	FGFR	1	1	1	0	100	1	10	27.6	-10.15	breast	-7.84	-1.79
DU4475	ATR_4	FGFR	1	1	1	0.43	20.77	0.15	2.76	0	-69.46	breast	-11.69	2.93
HCC1143	ATR_4	FGFR	1	1	1	0	100	0.94	10	0	-24.52	breast	-8.84	2.6
HCC1187	ATR_4	FGFR	1	1	0.41	10	89.3	0.37	10	55.1	-11.64	breast	-6.53	-3.32
HCC1395	ATR_4	FGFR	1	1	0.01	1.66	46.1	0.44	1.84	0	11.16	breast	0.99	9.51
HCC1806	ATR_4	FGFR	1	1	1	0	100	0.36	3.74	9.45	8	breast	-7.76	-4.4
HCC1937	ATR_4	FGFR	1	1	1	0	100	1	2.63	64.23	-10.66	breast	-6.25	5.73
HCC38	ATR_4	FGFR	1	1	0.03	1.12	74.97	0.29	10	26.9	-27.53	breast	-7.56	5.08
HCC70	ATR_4	FGFR	1	1	1	0	100	0.53	0.61	0	-101.85	breast	-13.05	-11.57
HT1197	ATR_4	FGFR	3	3	3	0.68	3.8	0.94	1.15	37.65	4.98	urinary_tract	-9.42	3.07
HT1376	ATR_4	FGFR	3	3	2.76	0.2	0	0.39	0.39	0	-58.24	urinary_tract	-11.24	-1.11
J82	ATR_4	FGFR	3	3	3	0.38	17.52	0.98	3.75	44.07	12.75	urinary_tract	-3.25	7.89
MDAMB157	ATR_4	FGFR	1	1	0.03	2.03	28.63	0.35	10	38.4	-9.06	breast	5.36	3.07
MDAMB436	ATR_4	FGFR	1	1	1	1.54	74.34	0.32	10	57.1	-18.89	breast	-10.04	-5.29
MDAMB453	ATR_4	FGFR	1	1	0.2	10	30.57	0.23	2.9	6.78	-8.13	breast	-10.43	-9.56
MDAMB468	ATR_4	FGFR	1	1	1	0.96	81.1	0.32	10	68.6	-7.54	breast	-9.61	10.72
T24	ATR_4	FGFR	3	3	1	0	100	1.14	10	10.29	-19.31	urinary_tract	-11.02	3.07
TCCSUP	ATR_4	FGFR	3	3	0.03	1.1	55.92	0.75	2.09	17.62	35.9	urinary_tract	7.22	15.21
UMUC3	ATR_4	FGFR	3	3	1	0	100	1.18	3.04	48.59	-2.44	urinary_tract	-4.71	-1.97
647V	ATR_4	Gemcitabine	0.1	3	0	3.05	0	1.45	2.63	53.47	38.49	urinary_tract	11.31	3.44
BFTC905	ATR_4	Gemcitabine	0.1	3	0	4.63	1.47	0.66	1.41	0	6.78	urinary_tract	4.17	2.38
BT20	ATR_4	Gemcitabine	0.1	3	0	1.54	18.81	1.37	1.78	30.18	30.73	breast	10.39	7.97
BT474	ATR_4	Gemcitabine	0.1	3	0	1.56	35.77	0.64	10	68.48	34.99	breast	8.05	1.53
CAMA1	ATR_4	Gemcitabine	10	3	0.37	1.64	25.92	3	10	50.6	24.62	breast	6.72	1.9
DMS114	ATR_4	Gemcitabine	0.03	3	0	0.1	91.62	2.21	1.02	0	-5.88	lung	10.65	9.45
HCC1395	ATR_4	Gemcitabine	0.1	3	0	0.1	18.76	1	10	14.3	33.33	breast	4.59	11.37
HCC1419	ATR_4	Gemcitabine	0.1	3	0.01	2.02	26.8	1.2	1.32	55.74	1.78	breast	8.14	4.31
HCC1569	ATR_4	Gemcitabine	0.1	3	0	1.02	40.61	2.92	0.66	0	47.85	breast	6.81	-1.2
HCC1954	ATR_4	Gemcitabine	0.1	3	0	1.77	5.89	1.21	10	34.69	16.69	breast	2.07	-16.75
HCC70	ATR_4	Gemcitabine	0.1	3	0	1.42	31.31	0.55	0.58	0	24.21	breast	3.73	3.78
HT1197	ATR_4	Gemcitabine	0.1	3	0.01	2.21	27.63	3	10	40	25.29	urinary_tract	8.98	3.44
HT1376	ATR_4	Gemcitabine	0.1	3	0	1.49	21.73	0.99	10	38.9	2.76	urinary_tract	-1.48	-12.24
J82	ATR_4	Gemcitabine	0.1	3	0	3.19	5.42	0.91	5.11	41.97	-0.56	urinary_tract	0.39	-3.38
MCF 7,00	ATR_4	Gemcitabine	0.1	3	0	1.3	15.91	0.37	1.02	10.18	1.97	breast	14.72	-2.4
MDAMB157	ATR_4	Gemcitabine	0.1	3	0	1.36	13.98	2.17	1.42	0	31.07	breast	6.91	3.44
MDAMB361	ATR_4	Gemcitabine	0.1	3	0	1.83	35.82	1.09	10	49.5	13.26	breast	5.56	-18.47
MDAMB415	ATR_4	Gemcitabine	0.1	3	0	1.86	21.89	3	0.82	41.64	13.16	breast	2.06	0.46
MDAMB436	ATR_4	Gemcitabine	0.1	3	0	1.51	19.47	3	0.65	6.32	26.94	breast	4.77	5.41
MDAMB453	ATR_4	Gemcitabine	0.1	3	0.01	1.86	7.02	0.56	1.75	6.98	8.39	breast	2.52	-22.62
MDAMB468	ATR_4	Gemcitabine	0.1	3	0	1.69	1.61	0.96	0.75	0	22.53	breast	9.22	5.08
NCIH1299	ATR_4	Gemcitabine	0.01	3	0	3.05	6.59	1.1	10	36.1	10.12	lung	13.47	3.44
NCIH1437	ATR_4	Gemcitabine	0.01	3	0	2.06	11.64	3	2.22	61.81	-8.65	lung	-2.06	-3.8
NCIH1703	ATR_4	Gemcitabine	0.01	3	0	2.9	9.59	0.56	2.31	15.37	24.97	lung	5.31	-4.62
NCIH1793	ATR_4	Gemcitabine	0.03	3	0.01	4.26	6.47	1.21	10	62.4	38.2	lung	24.24	3.2
NCIH1975	ATR_4	Gemcitabine	0.1	3	0	2.66	23.33	3	3.69	64.4	28.23	lung	2.07	5.26
NCIH2085	ATR_4	Gemcitabine	1	3	0.05	0.82	21.7	1.98	1.35	30.8	26.69	lung	12.17	3.44
NCIH2228	ATR_4	Gemcitabine	0.03	3	0	1.19	0	3	0.9	5.58	23.51	lung	15.91	3.44
NCIH226	ATR_4	Gemcitabine	0.1	3	0.01	2.3	7.57	1.35	1.48	23.06	15.21	lung	10.55	3.44
NCIH2291	ATR_4	Gemcitabine	0.03	3	0	1.1	20.71	3	10	4	5.35	lung	10.04	-0.38
NCIH23	ATR_4	Gemcitabine	0.01	3	0	3.74	13.78	0.74	2.51	24.87	-3.2	lung	-1.75	-3.29
NCIH358	ATR_4	Gemcitabine	0.01	3	0	0.86	0	3	10	41	-10.59	lung	1.71	-20.7
NCIH522	ATR_4	Gemcitabine	0.03	3	0	1.89	5.24	3	0.91	21.61	10.09	lung	6.27	-3.52
NCIH838	ATR_4	Gemcitabine	0.1	3	0.01	10	4.65	0.96	10	10	-3.2	lung	11.26	2.99
SW780	ATR_4	Gemcitabine	0.1	3	0	2.96	22.24	3	10	78.6	48.82	urinary_tract	-0.28	-6.6
SW900	ATR_4	Gemcitabine	0.01	3	0	1.3	0	1.25	1.28	8.21	13.29	lung	5.4	2.9
T24	ATR_4	Gemcitabine	0.1	3	0	10	47.74	0.94	10	6	10.82	urinary_tract	16.92	3.44
TCCSUP	ATR_4	Gemcitabine	0.1	3	0	2.89	7.64	0.74	2	14.95	22.64	urinary_tract	7.81	12.64
UMUC3	ATR_4	Gemcitabine	0.1	3	0.01	3	0.94	1.03	10	49.5	39.64	urinary_tract	6.29	2.1
J82	ATR_4	HDAC_4	3	3	1.26	1.94	14.89	1.18	10	58.5	-24.43	urinary_tract	-15.85	-14.97
SW780	ATR_4	HDAC_4	3	3	0.48	0.55	9.39	0	0.1	80.34	17.07	urinary_tract	-16.37	0.02
UMUC3	ATR_4	HDAC_4	3	3	2.04	2	0	0.97	1.88	50.93	-0.75	urinary_tract	-12.27	-13.12
647V	ATR_4	HSP90	3	3	0.14	3.68	4.14	1.38	10	74.19	1.44	urinary_tract	-8.68	7.42
BFTC905	ATR_4	HSP90	3	3	0.1	1.86	0.4	1.03	10	16.8	-14.83	urinary_tract	-8.11	7.69
HT1376	ATR_4	HSP90	3	3	0.06	1.82	8.99	1.73	1.61	0	4.47	urinary_tract	-13.93	5.35
J82	ATR_4	HSP90	3	3	0.11	2.4	22.15	1.01	10	59.5	8.33	urinary_tract	-11.13	-7.68
SW780	ATR_4	HSP90	0.3	3	0.12	10	42.59	3	10	91.6	2.71	urinary_tract	-14.04	-0.66
T24	ATR_4	HSP90	0.3	3	0.1	10	7.1	1.11	10	9.5	-49.01	urinary_tract	-11.38	7.42
TCCSUP	ATR_4	HSP90	0.3	3	0.17	1.46	0	0.6	1.47	21.05	14.75	urinary_tract	-5.73	12.5
UMUC3	ATR_4	HSP90	0.3	3	0.12	10	17.49	1	10	55.4	-4.4	urinary_tract	-6.36	9.3
NCIH1299	ATR_4	IAP	1	3	0.07	0.97	33.64	1.15	10	41.4	23.15	lung	23.32	11.15
NCIH1437	ATR_4	IAP	1	3	0.01	0.4	69.53	1.55	10	83.98	-36.2	lung	3.34	10.86
NCIH1703	ATR_4	IAP	0.01	3	0	1.69	19.21	0.58	2.18	14.24	7.86	lung	4.94	-1.04
NCIH2085	ATR_4	IAP	3	3	1.64	0.25	0	3	10	42.8	3.94	lung	14.74	11.15
NCIH2228	ATR_4	IAP	0.3	3	0.01	0.38	5.06	1	2.01	37.69	-15.66	lung	11.75	11.15
NCIH23	ATR_4	IAP	1	3	0	0.22	33.69	0.77	2.51	18.28	16.2	lung	14.66	2.91
SW780	ATR_4	IAP	0.03	3	0	2.32	67.67	1	0	100	16.7	urinary_tract	-16.53	-24.2
SW900	ATR_4	IAP	3	3	0.5	0.16	0	1.34	1.67	16.75	9.77	lung	11.89	11.84
647V	ATR_4	MAP2K_1	1	3	0.27	1.36	71.06	3	10	46.6	-7.1	urinary_tract	-1.76	-4.95
CAL120	ATR_4	MAP2K_1	1	1	1	10	58.4	0.35	10	74.4	-1.9	breast	-2.4	-4.95
CAMA1	ATR_4	MAP2K_1	1	1	1	0	100	1	10	28.8	15.75	breast	-6.5	-2.96
HCC1187	ATR_4	MAP2K_1	1	1	0.04	0.73	49.11	1	1.85	11.43	-7.58	breast	-1.25	4.1
HCC1395	ATR_4	MAP2K_1	1	1	1	0.54	53.75	0.4	1.91	7.61	3.64	breast	-2.68	-0.83
HT1376	ATR_4	MAP2K_1	3	3	0.03	10	49.42	0.93	0.74	0	-3.19	urinary_tract	-3.83	-2.5
J82	ATR_4	MAP2K_1	3	3	3	0.17	40.96	3	1.08	6.94	17.38	urinary_tract	-1.04	-6.33
SW780	ATR_4	MAP2K_1	3	3	1.22	3.55	46.27	1.66	10	84.26	-18.1	urinary_tract	-2.19	-0.03
T24	ATR_4	MAP2K_1	3	3	0.34	0.87	15.32	1.04	10	10.8	-12.31	urinary_tract	-6.43	-4.95
647V	ATR_4	MTOR_1	1	3	0.39	2.21	35.21	1.52	10	66.16	-21.24	urinary_tract	-15.94	-2.36
BFTC905	ATR_4	MTOR_1	3	3	0.3	1.58	24.97	1.05	10	16.2	-16.4	urinary_tract	-14.52	-2.06
BT20	ATR_4	MTOR_1	1	1	0.43	1.11	0	0.36	10	44.8	-22.91	breast	-13.81	2.7
BT549	ATR_4	MTOR_1	1	1	0.21	1.27	18.85	1	10	20	-24.29	breast	-21.79	-2.36
CAL148	ATR_4	MTOR_1	1	1	1	0.99	46.71	1	10	0.2	-0.78	breast	-14.39	2
HCC1143	ATR_4	MTOR_1	1	1	0.86	1.07	0	0.39	10	37.1	-45.8	breast	-26.92	-7.71
HCC1187	ATR_4	MTOR_1	1	1	0.27	10	13	0.35	10	58.3	-3.1	breast	-19.98	-1.05
MDAMB453	ATR_4	MTOR_1	1	1	0.27	10	12.6	0.22	2.26	5.45	-8.32	breast	-23.94	-18.15
T24	ATR_4	MTOR_1	3	3	0.8	2.27	13.08	0.96	10	9.2	-12.01	urinary_tract	-19.68	-2.36
647V	ATR_4	PARP1	3	3	3	1.99	74.38	3	10	57.4	24.72	urinary_tract	-6.79	4.01
BFTC905	ATR_4	PARP1	3	3	3	0.49	27.71	1.05	10	12.8	-13.38	urinary_tract	-6.51	3.59
HT1197	ATR_4	PARP1	3	3	2.68	0.19	0	2.9	0.94	0	-50.71	urinary_tract	-7.51	4.01
J82	ATR_4	PARP1	3	3	3	1.06	54.57	0.97	10	56.3	11.97	urinary_tract	-11.82	-0.25
SW780	ATR_4	PARP1	3	3	1	0	100	0.25	3.23	72.49	-45.26	urinary_tract	-12.9	2.48
T24	ATR_4	PARP1	3	3	3	10	18.2	1.1	10	10.4	-14.33	urinary_tract	-13.18	4.01
TCCSUP	ATR_4	PARP1	3	3	3	0.88	37.92	0.37	1.07	11.62	-35.98	urinary_tract	-4.65	14.48
UMUC3	ATR_4	PARP1	3	3	3	0.63	69.54	0.84	2.33	54.25	34.43	urinary_tract	-4.47	5.58
647V	ATR_4	PIK3C	3	3	1.14	3.26	54.23	3	10	40.6	-8.56	urinary_tract	-1.58	3.83
BFTC905	ATR_4	PIK3C	3	3	1.36	1.03	9.94	0.99	1.54	0	0.65	urinary_tract	5.52	3.83
BT20	ATR_4	PIK3C	1	1	0.26	1.23	29.31	1	1.5	7.66	-0.04	breast	5.78	3.83
BT549	ATR_4	PIK3C	1	1	0.27	5.31	33.63	1	10	30.6	-16.64	breast	-8.09	3.83
CAL120	ATR_4	PIK3C	1	1	1	0.36	46.77	0.31	4.42	69.62	-35.45	breast	-3.02	3.83
CAL148	ATR_4	PIK3C	1	1	0.31	10	46.3	1	2.24	2.61	-11.04	breast	-4.42	-2.24
CAL51	ATR_4	PIK3C	1	1	1	0.96	0	0.26	2.42	0.72	-2.93	breast	-3.39	7.26
CAMA1	ATR_4	PIK3C	1	1	0.37	10	52.4	0.37	10	59.1	-43.03	breast	-8.38	3.83
DU4475	ATR_4	PIK3C	1	1	0.14	1.83	0	0.22	1.66	0	28.3	breast	2.16	15.97
HCC1143	ATR_4	PIK3C	1	1	0.36	0.82	33.59	0.36	10	33.8	-54.73	breast	-9.17	3.93
HCC1187	ATR_4	PIK3C	1	1	0.22	2.59	27.02	1	10	18.4	4.74	breast	-5.4	-1.34
HCC1395	ATR_4	PIK3C	1	1	0.8	1.11	0.41	0.43	1.59	0	-19.7	breast	-4.87	-2.98
HCC1428	ATR_4	PIK3C	1	1	1	0.48	45.91	1	0.42	13.43	-39.64	breast	-8.39	-2.74
HCC1806	ATR_4	PIK3C	1	1	0.3	10	18.9	0.31	10	10.7	-27.39	breast	10.56	30.2
HCC1937	ATR_4	PIK3C	1	1	1	10	77.6	1	0	100	-12.43	breast	-5.34	0.29
HCC70	ATR_4	PIK3C	1	1	0.61	1.3	0	0.31	10	71.7	3.78	breast	-5.73	-5.96
HT1197	ATR_4	PIK3C	3	3	1	2.25	44.35	3	10	13	-20.58	urinary_tract	-3.57	3.83
HT1376	ATR_4	PIK3C	3	3	0.93	10	38.6	1.31	10	44.39	-44.35	urinary_tract	-8.15	3.72
J82	ATR_4	PIK3C	3	3	1.27	0.48	0	0.76	2.18	36.25	-17.43	urinary_tract	-4.72	6.46
MDAMB436	ATR_4	PIK3C	1	1	0.29	3.25	53.74	0.34	10	66.2	4.03	breast	-5.46	2.49
MDAMB453	ATR_4	PIK3C	1	1	0.21	2.57	9.69	0.22	2.44	6.64	14.11	breast	-5.94	-16.71
MDAMB468	ATR_4	PIK3C	1	1	1	10	94	1	10	53.2	-1.14	breast	-5.67	-5.85
SW780	ATR_4	PIK3C	3	3	3	10	83	3	10	78	-18.9	urinary_tract	-9.98	-18.5
T24	ATR_4	PIK3C	3	3	3	10	26.4	1.01	10	9.4	-19.23	urinary_tract	-10.52	3.83
TCCSUP	ATR_4	PIK3C	1	3	0.33	1.99	50.41	0.82	1.98	16.16	-6.7	urinary_tract	-0.63	4.9
UMUC3	ATR_4	PIK3C	3	3	1.53	1.54	18.48	1.48	1.29	34.26	-5.53	urinary_tract	-3.57	-1.13
VMCUB1	ATR_4	PIK3C	3	3	3	2.39	9.24	3	10	40.4	3.68	urinary_tract	-5.04	13.72
647V	ATR_4	PIK3CB_PIK3CD	3	3	0.71	1.42	5.78	3	5.56	53.8	11.95	urinary_tract	-3.33	1.14
BFTC905	ATR_4	PIK3CB_PIK3CD	3	3	0.39	2.01	26.54	1.09	3.27	12.34	0.72	urinary_tract	2.35	4.24
BT20	ATR_4	PIK3CB_PIK3CD	1	1	0.85	0.8	56.45	1	0.79	16.96	3.16	breast	1.84	3.83
BT549	ATR_4	PIK3CB_PIK3CD	1	1	0.14	0.71	30.2	1	10	44	-34.89	breast	-6.24	1.14
CAL120	ATR_4	PIK3CB_PIK3CD	1	1	0.07	1.28	56.42	0.21	1.06	55.76	-49.68	breast	-3.21	1.14
CAL148	ATR_4	PIK3CB_PIK3CD	1	1	0.33	2.99	15.14	0.37	10	52.7	-16.17	breast	-8.1	-8.79
CAL51	ATR_4	PIK3CB_PIK3CD	1	1	1	0.74	79.78	0.29	2.13	0	3.87	breast	-2.27	2.53
CAMA1	ATR_4	PIK3CB_PIK3CD	1	1	0.23	0.81	0	0.34	10	59.2	-19.24	breast	-2.51	15.17
HCC1143	ATR_4	PIK3CB_PIK3CD	1	1	1	0.63	33.82	0.36	10	37	-28.74	breast	-3.94	5.22
HCC1187	ATR_4	PIK3CB_PIK3CD	1	1	0.3	10	71.8	0.34	10	67.1	-1.05	breast	-3.75	-7.65
HCC1395	ATR_4	PIK3CB_PIK3CD	1	1	0.23	0.29	28.3	0.46	1.52	0	-0.46	breast	-1.96	3.09
HCC1428	ATR_4	PIK3CB_PIK3CD	1	1	1	10	80	0.54	1.02	45.72	2.6	breast	-6.31	-9.44
HCC1806	ATR_4	PIK3CB_PIK3CD	1	1	0.88	9.84	86.85	0.33	10	11	18.97	breast	2.14	3.4
HCC1937	ATR_4	PIK3CB_PIK3CD	1	1	1	0.36	51.55	1	0	100	-18.19	breast	-0.94	1.69
HCC38	ATR_4	PIK3CB_PIK3CD	1	1	0.19	10	92.38	0.54	1.41	0	-38.9	breast	-2.47	13.08
HCC70	ATR_4	PIK3CB_PIK3CD	1	1	0.11	1.09	0	1	10	45.6	2.04	breast	-1.01	13.46
HT1197	ATR_4	PIK3CB_PIK3CD	3	3	0.1	10	82.1	3	0.67	15.39	-4.37	urinary_tract	6.94	1.14
J82	ATR_4	PIK3CB_PIK3CD	3	3	0.62	0.68	31.63	0.92	2.93	38.31	-3.91	urinary_tract	-3.29	-15.92
MDAMB157	ATR_4	PIK3CB_PIK3CD	1	1	0.12	0.43	28.78	0.35	10	40.1	6.54	breast	0.74	1.14
MDAMB436	ATR_4	PIK3CB_PIK3CD	1	1	0.12	0.79	61.92	1	1.5	24.57	4.44	breast	-2.36	6.87
MDAMB453	ATR_4	PIK3CB_PIK3CD	1	1	0.14	1.01	24.8	0.17	1.86	4.68	-6.02	breast	0.54	-17.47
MDAMB468	ATR_4	PIK3CB_PIK3CD	1	1	1	0.22	82.83	0.35	10	77.7	11.05	breast	4.22	7.08
SW780	ATR_4	PIK3CB_PIK3CD	3	3	1	0	100	3	10	80.4	-45.01	urinary_tract	-11.21	-4.12
T24	ATR_4	PIK3CB_PIK3CD	3	3	0.98	10	83.8	1	10	9.4	8.62	urinary_tract	-5.41	1.14
TCCSUP	ATR_4	PIK3CB_PIK3CD	3	3	0.39	0.86	55.88	0.75	2.07	15.08	4.9	urinary_tract	1.86	12.34
UMUC3	ATR_4	PIK3CB_PIK3CD	3	3	3	1.27	58.38	0.99	2.83	46.26	-6.11	urinary_tract	-2.11	-5.26
VMCUB1	ATR_4	PIK3CB_PIK3CD	3	3	1.63	1.24	70.18	3	10	33.4	-16.86	urinary_tract	-6.01	-17.73
647V	ATR_4	PIM1	3	3	3	10	92	1.31	10	71.89	-13.62	urinary_tract	9.38	1.74
BFTC905	ATR_4	PIM1	3	3	3	1.41	62.33	1.02	2.62	8.6	-40.04	urinary_tract	12.78	3.76
HT1197	ATR_4	PIM1	3	3	0	0.1	91.34	3	10	23.2	-14.18	urinary_tract	13.38	1.74
HT1376	ATR_4	PIM1	3	3	1.07	0.41	0	1.48	1.39	0	-66.22	urinary_tract	-3.12	2.62
J82	ATR_4	PIM1	3	3	0.23	3.93	85.88	1.02	10	44.6	-17.16	urinary_tract	-2.23	-16.21
SW780	ATR_4	PIM1	3	3	1	0	100	3	1.92	63.58	-45.56	urinary_tract	-0.96	-10.73
T24	ATR_4	PIM1	3	3	1	0	100	1.06	10	12.7	-30.3	urinary_tract	-1.49	1.74
TCCSUP	ATR_4	PIM1	3	3	0.95	3.51	91.25	0.8	2.05	26.99	-14.96	urinary_tract	5.27	11.81
UMUC3	ATR_4	PIM1	3	3	1	0	100	1.05	1.94	46.48	-1.64	urinary_tract	1.07	1.54
647V	ATR_4	SRC	3	3	3	3.74	74.8	0.46	10	60.25	-36.47	urinary_tract	1.32	1.09
BFTC905	ATR_4	SRC	1	3	1	10	72.2	0.97	10	14.8	-11.94	urinary_tract	1.07	0.34
J82	ATR_4	SRC	3	3	0.05	2.55	73.37	0.91	2.07	35.77	-11.64	urinary_tract	1.65	-17.4
T24	ATR_4	SRC	3	3	0.95	2.52	23.24	1.06	10	10.6	-0.47	urinary_tract	-1.65	1.09
TCCSUP	ATR_4	SRC	3	3	0.58	1.48	69.31	0.74	2.09	18.33	13.39	urinary_tract	5.5	11.04
UMUC3	ATR_4	SRC	3	3	2.09	1.84	41.23	1.16	2.28	45.79	-3.9	urinary_tract	3.35	-2.63
647V	BCL2_BCL2L1	CHEK1	1	3	0.37	10	28.6	1.78	0.67	38.86	-24.86	urinary_tract	9.94	11.06
BFTC905	BCL2_BCL2L1	CHEK1	1	3	0.18	1.17	0	0.44	0.54	54.83	3.66	urinary_tract	9.62	16.28
J82	BCL2_BCL2L1	CHEK1	1	3	0.35	2.81	30.87	3	0.5	37.06	-38.07	urinary_tract	-2.5	-19.84
KU1919	BCL2_BCL2L1	CHEK1	1	3	0.3	10	15	3	0.95	40.85	-23.22	urinary_tract	5.47	10.82
SW780	BCL2_BCL2L1	CHEK1	3	0.3	0.89	5.98	6.04	0.01	1.05	23.81	-48.77	urinary_tract	-12.4	25.45
T24	BCL2_BCL2L1	CHEK1	1	0.3	0.26	10	1.7	1	0	100	-8.13	urinary_tract	1.57	11.06
TCCSUP	BCL2_BCL2L1	CHEK1	1	3	0.18	2.84	4.45	1.26	10	79.1	-9.36	urinary_tract	2.16	-21.26
UMUC3	BCL2_BCL2L1	CHEK1	1	3	0.35	10	38.2	1.52	0.61	20.49	-17.78	urinary_tract	6.73	9.8
647V	BCL2_BCL2L1	Cisplatin	3	3	1.3	3.27	0	2.93	0.7	25.74	11.02	urinary_tract	11.85	17.77
BFTC905	BCL2_BCL2L1	Cisplatin	3	3	0.39	1.18	0	0.77	1.21	49.33	-5.12	urinary_tract	10.96	23.24
HT1376	BCL2_BCL2L1	Cisplatin	3	3	1.48	1.07	0	0.44	2.31	55.24	6.98	urinary_tract	-8.22	-10.21
J82	BCL2_BCL2L1	Cisplatin	3	3	0.61	1.2	0	3	0.88	56.35	31.3	urinary_tract	11.25	-14.55
SW780	BCL2_BCL2L1	Cisplatin	3	0.3	3	0.9	9.56	0.01	1.09	24.44	15.65	urinary_tract	1.88	19.32
T24	BCL2_BCL2L1	Cisplatin	3	0.3	2.71	10	0	0.3	10	92	0.22	urinary_tract	5.37	17.77
UMUC3	BCL2_BCL2L1	Cisplatin	3	3	1.42	2.66	0	0.22	1.07	53.13	3.72	urinary_tract	17.45	16.31
VMCUB1	BCL2_BCL2L1	Cisplatin	3	3	1.26	10	27.29	3	0.69	67.97	-2.58	urinary_tract	12.74	16.05
647V	BCL2_BCL2L1	ERBB	0.1	3	0.09	1.47	72.62	1.01	0.85	53.56	21.59	urinary_tract	12.7	11.53
BFTC905	BCL2_BCL2L1	ERBB	3	3	0	0.1	65.23	0.07	0.71	69.2	-27.1	urinary_tract	28.52	15.54
BT20	BCL2_BCL2L1	ERBB	1	1	0.15	4.44	76.46	1	1.93	56.07	8.35	breast	14.98	8.69
BT549	BCL2_BCL2L1	ERBB	1	1	1	1.55	74.9	1	0.28	56.27	-5.66	breast	-3.38	11.53
CAL120	BCL2_BCL2L1	ERBB	1	1	1	0	100	0.09	1.23	35.55	-8.12	breast	15.82	11.53
CAL148	BCL2_BCL2L1	ERBB	1	1	1	0	100	0.31	10	47.4	1.73	breast	-4.93	10.96
CAL51	BCL2_BCL2L1	ERBB	1	1	1	0.87	71.88	1	0.49	61.93	7.9	breast	4.97	2.85
CAMA1	BCL2_BCL2L1	ERBB	1	1	1	0	100	0.19	0.84	86.76	0.32	breast	-1.84	-5.01
DU4475	BCL2_BCL2L1	ERBB	1	1	0.1	10	94.1	0	1.25	0.1	-1.03	breast	8.12	2.55
HCC1143	BCL2_BCL2L1	ERBB	1	1	0.01	0.7	58.75	0.42	1.07	46.11	16.41	breast	12.53	11.42
HCC1187	BCL2_BCL2L1	ERBB	1	1	0.04	0.54	89.46	0	0.1	92.7	-9.31	breast	-0.09	0.86
HCC1395	BCL2_BCL2L1	ERBB	1	1	0.43	10	36.99	0.04	1.04	88.99	-39.34	breast	22.13	7.53
HCC1428	BCL2_BCL2L1	ERBB	1	1	1	0.68	67.11	0.1	0.93	2.62	15.28	breast	1.12	4.54
HCC1806	BCL2_BCL2L1	ERBB	1	1	1	0	100	1	0	100	1.75	breast	5.07	5.76
HCC1937	BCL2_BCL2L1	ERBB	1	1	0.01	1.47	82.22	1	0.73	45.71	34.54	breast	15.71	16.19
HCC38	BCL2_BCL2L1	ERBB	1	1	0	0.1	78.93	0.18	2.98	8.17	15.96	breast	14.1	12.73
HT1197	BCL2_BCL2L1	ERBB	3	3	1	0	100	1	0	100	-25.85	urinary_tract	9.25	11.53
HT1376	BCL2_BCL2L1	ERBB	1	3	0.22	0.83	32.79	1.68	1.18	42.01	44.72	urinary_tract	7.51	-13.67
J82	BCL2_BCL2L1	ERBB	3	3	0.04	2.79	84.12	3	0.39	37.7	10.64	urinary_tract	12.03	6.45
MDAMB157	BCL2_BCL2L1	ERBB	1	1	1	0.55	58.17	0.27	10	89	-8.63	breast	17.55	11.53
MDAMB436	BCL2_BCL2L1	ERBB	1	1	0.18	10	89.03	0.38	1.95	85.79	-4.66	breast	3.64	3.39
MDAMB453	BCL2_BCL2L1	ERBB	1	1	0.29	10	49.3	0.31	10	84.7	9.6	breast	20.36	0.22
MDAMB468	BCL2_BCL2L1	ERBB	1	1	0.06	1.7	89.88	0.37	1.1	51.94	80.63	breast	54.11	11.53
SW780	BCL2_BCL2L1	ERBB	3	0.3	3	0.4	52.54	0.02	0.81	13.83	3.01	urinary_tract	-31.79	-33.22
T24	BCL2_BCL2L1	ERBB	3	0.3	3	10	71.4	1	0	100	-20.6	urinary_tract	1.2	11.53
TCCSUP	BCL2_BCL2L1	ERBB	3	3	0.03	1.2	89.04	1.02	10	87.8	1.84	urinary_tract	13.7	9.41
UMUC3	BCL2_BCL2L1	ERBB	3	3	1.11	10	81.1	0.3	0.99	45.09	-21.68	urinary_tract	-0.6	7.43
BT20	BCL2_BCL2L1	FGFR	1	1	0.29	1.64	77.9	1	0.44	61.31	-2.41	breast	7.04	1.69
BT549	BCL2_BCL2L1	FGFR	1	1	0.05	1.06	61.99	0.1	1.14	82.11	3.01	breast	-4.65	3.37
J82	BCL2_BCL2L1	FGFR	3	3	0.13	1.03	58.57	1.02	10	80.5	30.57	urinary_tract	0.74	10.35
MCF 7,00	BCL2_BCL2L1	FGFR	3	3	2.53	0.78	0	0.04	2.9	76.21	-0.42	breast	3.46	-0.18
NCIH1703	BCL2_BCL2L1	FGFR	3	3	1.7	1.12	0	3	0.62	38.4	16.44	lung	4.03	19.1
SW780	BCL2_BCL2L1	FGFR	3	3	0.6	0.45	0	0.11	0.74	43.01	36.39	urinary_tract	11.49	0.16
TCCSUP	BCL2_BCL2L1	FGFR	3	3	0.04	1.61	58.94	3	10	88	55.92	urinary_tract	10.55	9.14
VMCUB1	BCL2_BCL2L1	FGFR	3	3	1	0	100	0.32	10	63.9	-18.49	urinary_tract	0.08	8.58
KU1919	BCL2_BCL2L1	Gemcitabine	0.1	3	0	10	9.33	3	0.55	37.58	32.3	urinary_tract	8.21	15.79
SW780	BCL2_BCL2L1	Gemcitabine	0.1	0.3	0	2.78	11.38	0.02	0.74	12.02	48.44	urinary_tract	0.65	11.06
TCCSUP	BCL2_BCL2L1	Gemcitabine	0.1	3	0	3.68	8.35	1.11	10	88.6	30.29	urinary_tract	10.46	-12.66
647V	BCL2_BCL2L1	HDAC_4	3	3	1.49	1.58	0	2.27	0.74	29.62	3.4	urinary_tract	7.5	-2.74
BFTC905	BCL2_BCL2L1	HDAC_4	3	3	0.37	1.5	12.58	3	0.6	27.18	42.64	urinary_tract	6.26	0.34
HT1197	BCL2_BCL2L1	HDAC_4	3	3	1.39	1.44	0	1.57	10	24.18	-54.91	urinary_tract	9.32	-2.74
HT1376	BCL2_BCL2L1	HDAC_4	3	3	0.74	1.13	5.59	0.64	2.13	47.17	-6.6	urinary_tract	0.65	-19.41
J82	BCL2_BCL2L1	HDAC_4	3	3	1.38	1.29	0	3	1.5	55.46	25.47	urinary_tract	2.56	-10.99
SW780	BCL2_BCL2L1	HDAC_4	3	0.3	0.86	0.87	0	0.02	1.01	23.99	45.56	urinary_tract	11.33	10.2
T24	BCL2_BCL2L1	HDAC_4	3	0.3	1.13	10	14.1	0.3	10	83.8	-12.19	urinary_tract	1.85	-2.74
TCCSUP	BCL2_BCL2L1	HDAC_4	3	3	0.69	1.01	0	1	0	100	6.19	urinary_tract	5.11	3.42
UMUC3	BCL2_BCL2L1	HDAC_4	3	3	1.12	10	26.7	0.86	0.74	32.3	-12.38	urinary_tract	5.27	-2.64
647V	BCL2_BCL2L1	HSP90	3	3	0.13	4.21	4.14	1.06	0.95	42.38	7.55	urinary_tract	11.45	16.14
BFTC905	BCL2_BCL2L1	HSP90	3	3	0.08	1.89	0.85	0.14	0.71	67.55	11.59	urinary_tract	12.25	22.07
HT1197	BCL2_BCL2L1	HSP90	3	3	0.11	1.77	21.05	1	0	100	6.55	urinary_tract	15.76	16.14
HT1376	BCL2_BCL2L1	HSP90	3	3	0.07	2.33	10.77	2.59	0.46	0	-4.16	urinary_tract	8.72	-13.8
J82	BCL2_BCL2L1	HSP90	3	3	0.12	1.99	20.26	0.77	2.33	81.98	42.46	urinary_tract	-0.72	-4.68
SW780	BCL2_BCL2L1	HSP90	0.3	0.3	0.08	4.32	6.96	0.02	1.13	26.95	13.69	urinary_tract	15.64	18.85
T24	BCL2_BCL2L1	HSP90	0.3	0.3	0.09	10	8.4	0.12	10	93.3	-4.39	urinary_tract	5.01	16.14
TCCSUP	BCL2_BCL2L1	HSP90	0.3	3	0.19	2.5	7.94	1	0	100	-9.22	urinary_tract	5.08	-21.28
UMUC3	BCL2_BCL2L1	HSP90	0.3	3	0.17	2.86	0	0.45	0.78	34.28	-8.9	urinary_tract	10.66	17.97
VMCUB1	BCL2_BCL2L1	HSP90	0.3	3	0.12	10	13.79	1.27	0.67	78.46	4.08	urinary_tract	3.62	2.13
T24	BCL2_BCL2L1	IAP	1	0.3	0.5	2	84.86	0	0.1	84.52	-3.89	urinary_tract	19.72	29.12
UMUC3	BCL2_BCL2L1	IAP	0.03	3	0	1.05	62.89	1.04	0.64	13.15	22.24	urinary_tract	16.88	16.11
VMCUB1	BCL2_BCL2L1	IAP	0.03	3	0	0.1	51.62	0.05	10	76.86	-57.2	urinary_tract	12.25	6.52
BFTC905	BCL2_BCL2L1	MAP2K_1	3	3	1.23	1.67	19.16	3	0.53	28.69	28.05	urinary_tract	18.29	17.83
CAL148	BCL2_BCL2L1	MAP2K_1	1	1	0.02	1.29	87.89	0.29	2.59	41.17	27.43	breast	10.88	15.94
HCC1143	BCL2_BCL2L1	MAP2K_1	1	1	0.09	0.52	37.2	0.8	1.15	17.97	22.73	breast	7.32	-5.87
HCC1428	BCL2_BCL2L1	MAP2K_1	1	1	1	2.06	88.41	0.14	0.94	0	7.58	breast	4.53	9.68
HCC1937	BCL2_BCL2L1	MAP2K_1	1	1	0.05	1.18	82.83	0.29	1.57	72.07	21.73	breast	13.22	9.11
HCC38	BCL2_BCL2L1	MAP2K_1	1	1	0.06	3.78	90.01	0.2	3.82	10.31	-8.98	breast	10.08	19.77
HT1376	BCL2_BCL2L1	MAP2K_1	3	3	0.19	0.86	41.27	1.37	1.63	52.95	-16.71	urinary_tract	11.18	-11.33
J82	BCL2_BCL2L1	MAP2K_1	3	3	0.12	0.59	63.44	3	10	75.4	19.76	urinary_tract	5.53	-12.19
MDAMB436	BCL2_BCL2L1	MAP2K_1	1	1	0.04	0.92	62.19	0.11	10	91.4	16.29	breast	6.53	2.28
MDAMB468	BCL2_BCL2L1	MAP2K_1	1	1	1	0.55	68.77	0.32	0.82	53.45	35.76	breast	14.42	1.21
647V	BCL2_BCL2L1	MTOR_1	1	3	0.33	10	57.4	1.79	0.9	53.6	24.49	urinary_tract	16.29	11.08
BFTC905	BCL2_BCL2L1	MTOR_1	3	3	0.32	1.89	25.94	0.65	2.06	80.65	50.23	urinary_tract	18.33	14.37
BT20	BCL2_BCL2L1	MTOR_1	1	1	0.36	3.08	29.77	1	10	74.4	18.2	breast	14.14	7.8
BT549	BCL2_BCL2L1	MTOR_1	1	1	0.28	1.57	22.67	0.08	2.38	84.07	-1.69	breast	8.39	11.08
CAL120	BCL2_BCL2L1	MTOR_1	1	1	0.28	3.5	43.76	0.22	1.74	33.82	9.18	breast	12.68	11.08
CAL148	BCL2_BCL2L1	MTOR_1	1	1	1	10	70.8	0.31	10	50.7	20.23	breast	13.14	9.7
CAL51	BCL2_BCL2L1	MTOR_1	1	1	0.33	1.23	4.81	1	0.68	76.79	20.66	breast	7.03	4.32
CAMA1	BCL2_BCL2L1	MTOR_1	1	1	0.45	1.62	4.18	0.03	10	87.8	6.88	breast	9.07	0.08
DU4475	BCL2_BCL2L1	MTOR_1	1	1	0.21	2.52	4	0.01	10	0	-1.58	breast	10.53	0.77
HCC1143	BCL2_BCL2L1	MTOR_1	1	1	0.7	0.8	0	0.88	0.95	11.34	2.79	breast	5.58	-6.7
HCC1187	BCL2_BCL2L1	MTOR_1	1	1	0.27	10	10.9	1	0	100	3.32	breast	15.01	18.32
HCC1395	BCL2_BCL2L1	MTOR_1	1	1	0.37	1.33	30.86	1	0	100	9.88	breast	4.37	-1.07
HCC1428	BCL2_BCL2L1	MTOR_1	1	1	0.3	10	48.4	0.1	0.76	0	5.77	breast	13.93	12.09
HCC1806	BCL2_BCL2L1	MTOR_1	1	1	0.25	2.28	14.93	1	0	100	21.93	breast	9.58	-1.27
HCC1937	BCL2_BCL2L1	MTOR_1	1	1	0.3	4.8	79.74	0.42	1.79	68.19	3.2	breast	15.1	7.56
HCC38	BCL2_BCL2L1	MTOR_1	1	1	0.33	10	75.2	0.27	10	8.2	6.29	breast	11.49	12.88
HCC70	BCL2_BCL2L1	MTOR_1	1	1	0.34	10	53.6	1	0	100	-3.95	breast	-2.12	-1.16
J82	BCL2_BCL2L1	MTOR_1	3	3	1	0.8	0	1.07	10	72.1	7.41	urinary_tract	2.71	-3.22
MDAMB157	BCL2_BCL2L1	MTOR_1	1	1	1	0.72	4.67	0.46	10	92.4	32.9	breast	17.19	11.08
MDAMB436	BCL2_BCL2L1	MTOR_1	1	1	0.13	1.05	18.02	0.58	1.68	75.02	10.55	breast	7.28	-1.27
MDAMB468	BCL2_BCL2L1	MTOR_1	1	1	1	10	77.6	0.42	1.35	58.05	14.33	breast	14.17	16.57
SW780	BCL2_BCL2L1	MTOR_1	3	0.3	0.59	2.33	17.22	0.02	0.85	17.97	15.04	urinary_tract	16.48	16.73
T24	BCL2_BCL2L1	MTOR_1	3	0.3	0.73	2.14	10.87	0	0.1	86.39	-11.55	urinary_tract	6.02	11.08
TCCSUP	BCL2_BCL2L1	MTOR_1	1	3	1	0.86	1.93	3	10	78.6	-1.54	urinary_tract	10.6	-17.9
UMUC3	BCL2_BCL2L1	MTOR_1	1	3	1	3	49.4	0.21	0.8	44.5	-33.4	urinary_tract	10.51	8.8
VMCUB1	BCL2_BCL2L1	MTOR_1	1	3	0.33	10	56.1	0.1	1.18	82.33	3.27	urinary_tract	10.43	6.95
647V	BCL2_BCL2L1	PARP1	3	3	3	0.44	81.24	0.82	1.06	50.37	47.58	urinary_tract	11.96	12.4
BFTC905	BCL2_BCL2L1	PARP1	3	3	3	0.62	46.59	3	0.45	34.22	47.17	urinary_tract	10.31	19.79
BT20	BCL2_BCL2L1	PARP1	3	1	0.97	1.99	74.75	0.32	10	81.6	1.89	breast	10.63	5.8
BT549	BCL2_BCL2L1	PARP1	3	1	3	0.58	25.36	0.12	0.1	72.71	24.73	breast	3.63	12.4
CAL120	BCL2_BCL2L1	PARP1	3	1	1.61	0.32	9.66	0.23	0.65	9.89	29.51	breast	10.62	12.4
CAL148	BCL2_BCL2L1	PARP1	3	1	3	0.68	37.18	0.3	10	41	41.39	breast	13.8	9.09
CAL51	BCL2_BCL2L1	PARP1	3	1	2.65	1.25	0	0.28	10	94.6	10.5	breast	4.14	4.27
CAMA1	BCL2_BCL2L1	PARP1	3	1	3	0.74	19.26	1	0.36	70.64	13.97	breast	6.8	1.9
DU4475	BCL2_BCL2L1	PARP1	3	1	0.86	0.64	0	0	8.14	0.58	0.07	breast	4.44	2.99
HCC1143	BCL2_BCL2L1	PARP1	3	1	1.49	1.49	72.52	0.32	10	68.1	11.11	breast	-0.8	-14.19
HCC1187	BCL2_BCL2L1	PARP1	3	1	3	0.97	4.06	1	0	100	10.8	breast	8.29	0.1
HCC1395	BCL2_BCL2L1	PARP1	3	1	0.2	0.38	0	0.02	10	92.93	22.5	breast	0.8	7.01
HCC1428	BCL2_BCL2L1	PARP1	3	1	0.99	10	51.1	0.17	1.02	0	14.01	breast	15.92	19.09
HCC1806	BCL2_BCL2L1	PARP1	3	1	1.52	0.71	0	0.01	10	92.2	7.04	breast	2.3	-4.06
HCC1937	BCL2_BCL2L1	PARP1	3	1	3	0.61	51.7	1	0.83	44.87	10.86	breast	13.64	11.57
HCC38	BCL2_BCL2L1	PARP1	3	1	3	0.35	54.31	0.22	2.98	5.48	16.46	breast	8.83	22.57
HCC70	BCL2_BCL2L1	PARP1	3	1	0.37	10	90.9	1	0	100	-30.76	breast	-7.74	-18.01
HT1197	BCL2_BCL2L1	PARP1	3	3	0.96	10	66.3	1	0	100	29.13	urinary_tract	15.84	12.4
HT1376	BCL2_BCL2L1	PARP1	3	3	3	0.23	68.7	2.86	0.73	6.5	21.99	urinary_tract	7.7	-15.37
J82	BCL2_BCL2L1	PARP1	3	3	0.2	0.42	69.06	3	0.14	36.12	-39.69	urinary_tract	-3.28	-0.52
KU1919	BCL2_BCL2L1	PARP1	3	3	1	0	100	3	1.47	49.15	2.03	urinary_tract	7.23	12.4
MDAMB157	BCL2_BCL2L1	PARP1	3	1	0.93	0.65	0	0.03	1.15	82.96	20.76	breast	8.7	12.4
MDAMB436	BCL2_BCL2L1	PARP1	3	1	0.09	0.32	0	0.35	10	91.2	22.97	breast	3.26	4.1
MDAMB453	BCL2_BCL2L1	PARP1	3	1	1.37	0.75	0	0	0.1	84.72	11.91	breast	10.5	7.62
MDAMB468	BCL2_BCL2L1	PARP1	3	1	1.24	1.46	0	1	0.69	14.68	45.05	breast	9.49	19.29
SW780	BCL2_BCL2L1	PARP1	3	0.3	3	0.56	61.62	0.02	1	25.01	26.28	urinary_tract	15.17	11.47
T24	BCL2_BCL2L1	PARP1	3	0.3	3	2.42	8.08	0.3	0.9	68.82	14.66	urinary_tract	2.04	12.4
TCCSUP	BCL2_BCL2L1	PARP1	3	3	3	0.61	52.21	3	10	94.4	-2.48	urinary_tract	3.9	-1.16
UMUC3	BCL2_BCL2L1	PARP1	3	3	3	0.65	77.38	2.15	0.58	29.86	50.21	urinary_tract	9.05	13.64
647V	BCL2_BCL2L1	PIK3C	3	3	1.03	10	60.7	2.87	0.82	34.65	36.01	urinary_tract	8.9	8.82
BFTC905	BCL2_BCL2L1	PIK3C	3	3	1.67	0.8	0	3	0.64	31.09	59.33	urinary_tract	15.38	8.82
BT20	BCL2_BCL2L1	PIK3C	1	1	0.23	1.72	49.73	0.34	10	88.2	27.45	breast	15.28	8.82
BT549	BCL2_BCL2L1	PIK3C	1	1	0.28	2.18	28.47	0.14	10	88.4	15.73	breast	8.12	8.82
CAL120	BCL2_BCL2L1	PIK3C	1	1	1	10	67	0.2	2.6	41.83	23.25	breast	7.52	8.82
CAL148	BCL2_BCL2L1	PIK3C	1	1	0.33	10	56.2	0.33	10	47.5	30.66	breast	3.25	4.33
CAL51	BCL2_BCL2L1	PIK3C	1	1	0.88	0.86	0	1	0.62	75.87	9.45	breast	9.97	9.97
CAMA1	BCL2_BCL2L1	PIK3C	1	1	1	1.86	10.7	0.01	0.74	88.08	11.91	breast	5.37	8.82
DU4475	BCL2_BCL2L1	PIK3C	1	1	0.15	2.69	0	0	1.2	0.21	0.24	breast	13.82	18.22
HCC1143	BCL2_BCL2L1	PIK3C	1	1	0.93	0.57	7.73	0.43	1.02	35.47	17.15	breast	4.87	4.54
HCC1187	BCL2_BCL2L1	PIK3C	1	1	0.24	2.77	26.66	1	0	100	18.79	breast	17.58	23.75
HCC1395	BCL2_BCL2L1	PIK3C	1	1	0.34	10	55	1	0	100	11.69	breast	-13.96	-12.03
HCC1428	BCL2_BCL2L1	PIK3C	1	1	1	0.76	45.08	0.1	0.77	0.48	18.6	breast	2.61	4.7
HCC1806	BCL2_BCL2L1	PIK3C	1	1	0.32	10	23.8	1	0	100	9.54	breast	10.87	16.01
HCC1937	BCL2_BCL2L1	PIK3C	1	1	0.36	1.36	62.91	1	1.29	46.71	17.8	breast	11.14	7.49
HCC38	BCL2_BCL2L1	PIK3C	1	1	0.32	10	77.2	0.2	3.4	7.43	-0.06	breast	6.53	4.31
HCC70	BCL2_BCL2L1	PIK3C	1	1	0.34	10	55	1	0	100	5.35	breast	-17.83	-30.97
HT1197	BCL2_BCL2L1	PIK3C	3	3	0.98	10	59.9	1	0	100	12.95	urinary_tract	13.74	8.82
HT1376	BCL2_BCL2L1	PIK3C	3	3	0.72	0.44	0	3	0.29	4.03	17.96	urinary_tract	4.2	-2.13
J82	BCL2_BCL2L1	PIK3C	3	3	1.85	0.72	0	3	1.6	49.91	27.18	urinary_tract	1.76	-0.03
MDAMB157	BCL2_BCL2L1	PIK3C	1	1	0.08	0.92	66.85	1	10	86	26.72	breast	21.17	8.82
MDAMB436	BCL2_BCL2L1	PIK3C	1	1	0.3	10	55.9	0.31	10	91.8	28.88	breast	1.83	3.71
MDAMB453	BCL2_BCL2L1	PIK3C	1	1	0.24	2.54	9.84	1	0	100	28.85	breast	8.9	3.49
MDAMB468	BCL2_BCL2L1	PIK3C	1	1	1	10	79	0.31	10	69.1	46.56	breast	-1.2	-6.58
SW780	BCL2_BCL2L1	PIK3C	3	0.3	2.09	1.63	0	0.02	0.96	19.03	33.98	urinary_tract	4.73	-3.39
T24	BCL2_BCL2L1	PIK3C	3	0.3	1.09	10	52.3	0.3	4.67	81.4	11.15	urinary_tract	-1.62	8.82
TCCSUP	BCL2_BCL2L1	PIK3C	1	3	0.42	1.54	44.06	3	10	79.6	6.53	urinary_tract	7.09	-4.11
UMUC3	BCL2_BCL2L1	PIK3C	3	3	1.13	2.83	44.82	0.46	0.8	37.78	-11.72	urinary_tract	2.86	4.29
VMCUB1	BCL2_BCL2L1	PIK3C	3	3	3	2.48	7.44	0.22	0.72	81.46	18.16	urinary_tract	8.7	11.21
647V	BCL2_BCL2L1	PIK3CB_PIK3CD	3	3	0.68	1.45	8.06	0.73	0.89	58.63	64.07	urinary_tract	8.5	7.7
BFTC905	BCL2_BCL2L1	PIK3CB_PIK3CD	3	3	0.31	2.14	31.27	0.63	1.54	64.92	46.13	urinary_tract	14.41	13.63
BT20	BCL2_BCL2L1	PIK3CB_PIK3CD	1	1	1	0.75	72.01	0.3	10	82	5.57	breast	13.38	6.27
BT549	BCL2_BCL2L1	PIK3CB_PIK3CD	1	1	0.66	0.55	0	0.3	10	87.3	36.41	breast	10.3	7.7
CAL120	BCL2_BCL2L1	PIK3CB_PIK3CD	1	1	1	0.71	18.45	0.15	1	30.38	13.4	breast	8.29	7.7
CAL148	BCL2_BCL2L1	PIK3CB_PIK3CD	1	1	0.42	2.17	6.49	0.34	1.49	21.61	-5.16	breast	1.59	3.62
CAL51	BCL2_BCL2L1	PIK3CB_PIK3CD	1	1	0.16	3.85	87.62	0.26	10	89.6	-11.23	breast	9.54	4.11
CAMA1	BCL2_BCL2L1	PIK3CB_PIK3CD	1	1	0.2	1.43	22.92	1	10	90.4	20.94	breast	7.18	9.19
DU4475	BCL2_BCL2L1	PIK3CB_PIK3CD	1	1	0.05	10	72.68	0	8.74	0	-1.26	breast	13.05	3.6
HCC1143	BCL2_BCL2L1	PIK3CB_PIK3CD	1	1	0.95	0.47	28.99	1	0.88	5.74	15.15	breast	6.29	3.2
HCC1187	BCL2_BCL2L1	PIK3CB_PIK3CD	1	1	0.31	10	75.4	1	0	100	-2.29	breast	14.34	-2.27
HCC1395	BCL2_BCL2L1	PIK3CB_PIK3CD	1	1	0.29	0.41	39.6	1	0.24	86.53	-0.05	breast	-6.52	5.07
HCC1806	BCL2_BCL2L1	PIK3CB_PIK3CD	1	1	1	0	100	1	0	100	-25.71	breast	5.28	0.48
HCC1937	BCL2_BCL2L1	PIK3CB_PIK3CD	1	1	0.2	0.7	65.35	0.35	2.61	75.43	30.93	breast	12.02	11.25
HCC38	BCL2_BCL2L1	PIK3CB_PIK3CD	1	1	1	0.67	26.29	0.16	2.6	5.1	5.48	breast	7.46	10.84
HCC70	BCL2_BCL2L1	PIK3CB_PIK3CD	1	1	0.16	1.41	0	1	0	100	32.48	breast	-9.83	9.95
HT1376	BCL2_BCL2L1	PIK3CB_PIK3CD	3	3	0.42	1.05	23.91	2.37	0.58	0	47.22	urinary_tract	9.72	3.23
J82	BCL2_BCL2L1	PIK3CB_PIK3CD	3	3	0.44	1.32	35.85	3	0.78	48.28	7.41	urinary_tract	2.33	-17.3
MDAMB157	BCL2_BCL2L1	PIK3CB_PIK3CD	1	1	0.14	0.89	51.48	1	10	79.8	36.76	breast	16.45	7.7
MDAMB436	BCL2_BCL2L1	PIK3CB_PIK3CD	1	1	1	0.83	40.14	0.37	10	94.2	23.78	breast	4.51	4.87
MDAMB453	BCL2_BCL2L1	PIK3CB_PIK3CD	1	1	0.17	1.62	30.62	0.26	10	88	7.41	breast	11.88	6.22
MDAMB468	BCL2_BCL2L1	PIK3CB_PIK3CD	1	1	1	10	54.2	1	0.7	21.73	40.18	breast	9.02	10.48
SW780	BCL2_BCL2L1	PIK3CB_PIK3CD	3	0.3	3	1.59	65.84	0.01	0.87	19.34	5.49	urinary_tract	3.48	22.5
T24	BCL2_BCL2L1	PIK3CB_PIK3CD	3	0.3	3	10	81.8	1	0	100	-6.09	urinary_tract	1.32	7.7
TCCSUP	BCL2_BCL2L1	PIK3CB_PIK3CD	3	3	0.64	1.13	50.12	3	10	74.6	-31.1	urinary_tract	8.36	-22.81
UMUC3	BCL2_BCL2L1	PIK3CB_PIK3CD	3	3	1.48	2.05	78.02	0.23	0.9	40.11	-18.95	urinary_tract	3.91	4.72
BT549	BCL2_BCL2L1	PIM1	1	1	0.17	1.86	75.5	1	1.3	55.75	30.36	breast	17.15	17.01
CAL120	BCL2_BCL2L1	PIM1	1	1	1	0	100	0.32	0.64	22.46	34.41	breast	27.37	17.01
CAMA1	BCL2_BCL2L1	PIM1	1	1	1	0	100	1	0	100	34.27	breast	23.29	-7.53
HCC1395	BCL2_BCL2L1	PIM1	1	1	1	10	77.6	1	0	100	16.93	breast	16.14	5.81
HCC1428	BCL2_BCL2L1	PIM1	1	1	0.28	10	71.6	0.14	1.38	9.95	69.85	breast	27.25	24.4
HT1376	BCL2_BCL2L1	PIM1	3	3	0.06	2.08	66.12	0.15	1.26	46.58	-20.24	urinary_tract	21.04	-10.38
J82	BCL2_BCL2L1	PIM1	3	3	0.11	1.26	82.93	1.06	10	76.8	19.69	urinary_tract	12.78	-16
KU1919	BCL2_BCL2L1	PIM1	3	3	1	0	100	0.85	1.77	73.73	-39.88	urinary_tract	26.37	16.19
MDAMB436	BCL2_BCL2L1	PIM1	1	1	0.27	2.03	92.6	1	0	100	31.37	breast	20.3	7.34
T24	BCL2_BCL2L1	PIM1	3	0.3	1.15	10	88.7	0.3	0.77	74.25	7.97	urinary_tract	19.24	17.01
647V	BCL2_BCL2L1	SRC	3	3	3	10	83.2	3	0.72	24.08	10.83	urinary_tract	8.43	17.76
BFTC905	BCL2_BCL2L1	SRC	1	3	1	0.22	80.78	3	0.5	44.29	2.83	urinary_tract	13.65	22.33
J82	BCL2_BCL2L1	SRC	3	3	0.1	0.71	75.65	3	10	59.4	21.18	urinary_tract	7.01	-17.31
SW780	BCL2_BCL2L1	SRC	3	0.3	3	10	76.4	0.02	1.04	21.9	-20.46	urinary_tract	4.55	11.45
T24	BCL2_BCL2L1	SRC	3	0.3	0.96	10	31	1	0	100	-8.66	urinary_tract	7.31	17.76
TCCSUP	BCL2_BCL2L1	SRC	3	3	0.47	1.48	71.9	3	10	85.8	11.96	urinary_tract	12.54	-21.95
UMUC3	BCL2_BCL2L1	SRC	3	3	3	2.01	51.86	0.51	0.84	56.27	34.49	urinary_tract	10.96	17.36
647V	CHEK1	Cisplatin	3	1	1.25	2.69	0	0.49	2.49	13.32	32.03	urinary_tract	12.13	3.53
BFTC905	CHEK1	Cisplatin	3	1	0.47	1.44	0	0.21	1.49	0	22.65	urinary_tract	8.59	3.56
HT1197	CHEK1	Cisplatin	3	1	0.52	0.84	20.35	0.22	2.33	30.73	-20.62	urinary_tract	11.86	3.53
HT1376	CHEK1	Cisplatin	3	1	0.87	1.17	24.19	0.32	10	37.1	-45.16	urinary_tract	10.34	8.13
J82	CHEK1	Cisplatin	3	1	0.38	1.04	0	0.27	2.7	43.29	4.96	urinary_tract	11.53	6.13
T24	CHEK1	Cisplatin	3	1	1.3	10	26.88	0.21	3.7	1.32	-11.52	urinary_tract	16.97	3.53
TCCSUP	CHEK1	Cisplatin	3	1	0.49	2.31	12.94	0.24	4.77	6.59	25.57	urinary_tract	16	8.19
UMUC3	CHEK1	Cisplatin	3	1	1.23	2.45	0	0.35	10	39.5	21.23	urinary_tract	19.59	2.59
VMCUB1	CHEK1	Cisplatin	3	1	2.17	2.08	0	0.33	10	22.7	-16.27	urinary_tract	2.15	-1.01
647V	CHEK1	ERBB	0.1	1	0.04	1.61	68.52	0.37	10	26	-17.42	urinary_tract	12.8	1.02
BFTC905	CHEK1	ERBB	3	1	0	0.1	83.26	0.27	1.69	0	42.19	urinary_tract	28.93	1.3
HT1197	CHEK1	ERBB	3	1	3	10	92.2	0.25	3.82	27.84	-12.72	urinary_tract	5.82	1.02
HT1376	CHEK1	ERBB	1	1	0.11	1.35	53.22	0.33	10	34.1	7.54	urinary_tract	12.23	-4.01
J82	CHEK1	ERBB	3	1	0.55	10	90.6	0.32	10	43.9	-15.92	urinary_tract	15.42	22.27
T24	CHEK1	ERBB	3	1	3	1.88	56.75	0.21	3.77	1.45	-0.4	urinary_tract	0.2	1.02
TCCSUP	CHEK1	ERBB	3	1	3	0.21	89.64	0.21	3.18	4.81	-5.72	urinary_tract	12.99	3.93
UMUC3	CHEK1	ERBB	3	1	1.71	2.16	67.45	0.38	10	37	-5.17	urinary_tract	0.53	-2.28
VMCUB1	CHEK1	ERBB	3	1	3	0.45	37.6	0.33	10	19.5	29.02	urinary_tract	-0.54	-4.4
647V	CHEK1	FGFR	3	1	3	0.62	85.01	0.36	10	23.5	-23.56	urinary_tract	-4.37	3.17
BFTC905	CHEK1	FGFR	3	1	3	10	53.8	0.3	10	11.6	41.86	urinary_tract	-12.64	4.31
CAL120	CHEK1	FGFR	3	1	0.05	0.68	41.89	0.23	2.52	10.73	23.22	breast	1.8	3.17
DMS114	CHEK1	FGFR	3	1	0.15	2.15	14.79	0.27	3.18	23.78	-8.04	lung	-3.86	-13.75
HT1197	CHEK1	FGFR	3	1	3	10	56.8	0.29	10	29.4	-2.42	urinary_tract	-3.98	3.17
J82	CHEK1	FGFR	3	1	0.82	0.33	35.05	0.3	10	44.7	-2.6	urinary_tract	7.33	19.3
KATOIII	CHEK1	FGFR	0.01	1	0.01	2.65	5.53	0.09	3.09	6.79	-11.23	stomach	-2.04	-12.25
MCF 7,00	CHEK1	FGFR	3	1	1.25	10	59.99	0.02	2.01	10.94	11.25	breast	4.4	1.9
NCIH1703	CHEK1	FGFR	3	0.3	1.89	1.22	0	0.01	1.72	16.31	35.07	lung	-1.85	13
NCIH520	CHEK1	FGFR	3	1	0.08	1.1	61.63	0.34	10	28.9	30.32	lung	2.54	3.93
RT4	CHEK1	FGFR	3	1	0.46	0.87	24.01	0.27	5.09	3.17	34.99	urinary_tract	28	45.94
T24	CHEK1	FGFR	3	1	0	0.1	93.81	0.2	3.68	1.17	4.69	urinary_tract	-4.36	3.17
TCCSUP	CHEK1	FGFR	3	1	0.04	1.15	56.66	0.22	3.84	5.56	26.25	urinary_tract	13.82	19.38
UMUC3	CHEK1	FGFR	3	1	1	0	100	0.36	10	38.4	1.67	urinary_tract	-3.71	-1.19
647V	CHEK1	Gemcitabine	0.1	1	0	3.33	0	0.33	10	24.4	25.78	urinary_tract	11.31	4.51
BFTC905	CHEK1	Gemcitabine	0.1	1	0	4.56	1.8	0.24	2.22	0.46	8.87	urinary_tract	4.17	4.27
HT1197	CHEK1	Gemcitabine	0.1	1	0.01	1.53	18.91	0.19	1.26	14.07	-4.9	urinary_tract	8.98	4.51
HT1376	CHEK1	Gemcitabine	0.1	1	0	1.98	22.32	0.3	2.61	25.43	3.26	urinary_tract	-1.48	0.55
J82	CHEK1	Gemcitabine	0.1	1	0	2.24	3.32	0.33	10	41.2	8.54	urinary_tract	0.39	4.46
KU1919	CHEK1	Gemcitabine	0.1	1	0	4.21	7.43	0.29	10	10.1	7.22	urinary_tract	5.37	4.55
T24	CHEK1	Gemcitabine	0.1	1	0	10	49.68	0.2	4.15	1.57	0.27	urinary_tract	16.92	4.51
TCCSUP	CHEK1	Gemcitabine	0.1	1	0	2.45	7.1	0.18	3.03	5.59	20.22	urinary_tract	7.81	9
UMUC3	CHEK1	Gemcitabine	0.1	1	0.01	2.91	1.81	0.36	10	34.5	36.14	urinary_tract	6.29	0.01
VMCUB1	CHEK1	Gemcitabine	0.1	1	0.01	2.88	5.14	0.68	3.17	0	28.98	urinary_tract	10	-1.73
647V	CHEK1	HDAC_4	3	1	1.43	1.72	0	0.48	10	40.66	-0.88	urinary_tract	-5.71	-9.39
BT474	CHEK1	HDAC_4	1	1	1	0	100	0.26	2.07	29.82	-10.19	breast	-5.68	-9.63
CAMA1	CHEK1	HDAC_4	1	1	0.32	10	61.1	0.18	0.9	57.93	-15.57	breast	-9.78	-8.97
HCC1419	CHEK1	HDAC_4	1	1	0.01	10	93.13	0.3	10	52.3	-46.02	breast	-4.19	-1.65
HT1197	CHEK1	HDAC_4	3	1	1.03	1.16	6.44	0.24	3.73	31.8	-10.02	urinary_tract	-3.34	-9.39
HT1376	CHEK1	HDAC_4	3	1	1.22	1.16	12.89	0.32	10	29.6	-25.74	urinary_tract	-10.14	-7.84
J82	CHEK1	HDAC_4	3	1	1.2	1.62	8.43	0.34	10	50.5	-29.96	urinary_tract	-3.94	4.04
MCF 7,00	CHEK1	HDAC_4	1	1	0.94	1.71	0	0.11	2.73	11.67	2.41	breast	2.65	-3.62
MDAMB361	CHEK1	HDAC_4	1	1	0.38	2.82	27.01	0.07	1.85	34.76	-11.96	breast	-4.36	-8.42
T24	CHEK1	HDAC_4	3	1	1.07	10	10.1	0.27	10	2.4	-18.48	urinary_tract	-9.23	-9.39
TCCSUP	CHEK1	HDAC_4	3	1	0.62	1.21	0	0.21	3.2	5.55	-11.21	urinary_tract	-3.1	9.82
UACC812	CHEK1	HDAC_4	1	1	1	1.21	48.11	0.41	5.07	0	-8.99	breast	-10.94	-8.92
UMUC3	CHEK1	HDAC_4	3	1	1.4	2.91	14.67	0.49	3.68	39.21	-2.64	urinary_tract	-5.71	-9.39
VMCUB1	CHEK1	HDAC_4	3	1	2.69	2.01	0	0.34	10	24.3	-2.86	urinary_tract	-7.99	-8.04
647V	CHEK1	HSP90	3	1	0.12	4.31	3.45	0.36	10	29.9	-11.64	urinary_tract	3.66	8.55
BFTC905	CHEK1	HSP90	3	1	0.09	1.74	0	0.3	10	11.7	-2.27	urinary_tract	3.38	8.1
BT474	CHEK1	HSP90	1	1	0.05	2.17	2.53	0.27	2.43	35.25	-12.86	breast	6.24	-0.3
CAMA1	CHEK1	HSP90	1	1	0.14	2.65	33.26	0.33	10	74	54.46	breast	-2.21	7.54
HCC1419	CHEK1	HSP90	1	1	0.02	0.59	0	0.06	0.25	0	-2.73	breast	1.02	13.32
HCC1500	CHEK1	HSP90	1	1	0.11	3.6	0	0.15	3.26	7.2	4.55	breast	0.17	11.54
HT1376	CHEK1	HSP90	3	1	0.1	9.8	18.87	0.46	2.09	17.18	-5.47	urinary_tract	-1.05	7.94
J82	CHEK1	HSP90	3	1	0.07	1.45	10.27	0.26	3.3	36.63	7.19	urinary_tract	2.52	11.2
MCF 7,00	CHEK1	HSP90	1	1	0.04	3.03	9.42	0.13	2.71	10.73	3.28	breast	14.97	13.96
MDAMB361	CHEK1	HSP90	1	1	0.11	2.87	2.58	0.08	2.18	35.4	-0.35	breast	6.92	-1.28
T47D	CHEK1	HSP90	1	1	0.08	10	18.3	1	10	66.8	-17.56	breast	-1.76	5.62
TCCSUP	CHEK1	HSP90	0.3	1	0.15	2.24	0	0.2	3.19	5.43	2.66	urinary_tract	-1.35	14.46
UMUC3	CHEK1	HSP90	0.3	1	0.15	2.9	0	0.34	10	34.6	-8.59	urinary_tract	-0.49	7.9
A549	CHEK1	IAP	3	1	3	0.36	46.17	0.73	1.28	0	6.88	lung	8.19	2.28
BFTC905	CHEK1	IAP	3	1	0	0.27	0	0.23	1.84	0	-6.27	urinary_tract	5.71	8.18
HT1197	CHEK1	IAP	3	1	3	10	8.4	0.3	10	29.4	-4.98	urinary_tract	11.52	9.07
LS513	CHEK1	IAP	1	0.3	0.4	10	90.2	0.16	10	58.74	17.05	large_intestine	2.88	-7.47
NCIH1299	CHEK1	IAP	1	1	0.08	1.18	34.25	0.3	10	12.8	19.02	lung	24.92	9.07
NCIH23	CHEK1	IAP	1	1	0.01	0.45	36.6	0.21	2.81	11.46	3.93	lung	17.56	14.2
NCIH3122	CHEK1	IAP	0.3	1	0.3	0.26	46.55	0.19	2.01	0	31.89	lung	5.3	9.07
NCIH520	CHEK1	IAP	3	1	1	0	100	0.28	3.31	27.04	-2.6	lung	-5.45	1.91
NCIH522	CHEK1	IAP	0.3	1	0.01	0.23	0	0.38	10	37.4	4.77	lung	11.34	8.09
SW48	CHEK1	IAP	1	0.3	0	0.1	81.7	0.12	1.86	0	-32.74	large_intestine	-0.74	-9.26
SW900	CHEK1	IAP	3	1	0.73	0.2	0	0.23	2.54	19.87	10.98	lung	12.08	7.87
T24	CHEK1	IAP	1	1	1	0.54	71.21	0.26	10	1.1	33.95	urinary_tract	12.55	9.07
647V	CHEK1	MAP2K_1	1	1	0.26	1.61	73.88	0.48	10	39.76	-16.6	urinary_tract	9.62	4.75
BFTC905	CHEK1	MAP2K_1	3	1	0.7	0.54	0	0.13	0.91	0	-40.53	urinary_tract	11.49	7.24
C32	CHEK1	MAP2K_1	3	1	0.19	1.3	24.21	0.36	10	15.3	-4.07	large_intestine	9.92	-9.68
HT1197	CHEK1	MAP2K_1	1	1	0.05	2.58	80.48	0.22	3.44	32.72	-38.36	urinary_tract	10.46	4.75
HT1376	CHEK1	MAP2K_1	3	1	3	0.25	4	0.46	1.04	0	-8.33	urinary_tract	4.4	9.16
HT29	CHEK1	MAP2K_1	3	1	0.1	1.11	24.45	0.15	3.32	3.64	4.36	large_intestine	4.14	4.74
J82	CHEK1	MAP2K_1	3	1	3	0.23	27.45	0.31	10	52.1	-2.64	urinary_tract	9.93	0.61
LS513	CHEK1	MAP2K_1	0.3	0.3	0.1	1.09	7.76	0.13	10	62.09	-38.95	large_intestine	9.37	3.03
NCIH747	CHEK1	MAP2K_1	3	1	0.07	0.97	33.92	0.42	10	36.89	-21.7	large_intestine	5.66	-0.77
RKO	CHEK1	MAP2K_1	3	0.3	1.1	10	52.7	0.3	10	40.6	2.66	large_intestine	19.31	16.58
SW48	CHEK1	MAP2K_1	3	0.3	0.11	1.83	38.96	0.13	3.41	14.02	8.41	large_intestine	17.96	20.62
SW620	CHEK1	MAP2K_1	0.3	0.3	0.1	10	55.6	0.11	10	27.1	-23.92	large_intestine	9.48	1.64
SW837	CHEK1	MAP2K_1	3	0.3	0.35	1.42	55.43	0.08	2.9	7.11	-8.02	large_intestine	11.55	25.8
T24	CHEK1	MAP2K_1	3	1	0.17	1.02	20.98	0.2	3.75	0.84	13.24	urinary_tract	8.25	4.75
TCCSUP	CHEK1	MAP2K_1	3	1	3	0.3	32.32	0.23	3.31	5.6	-7.2	urinary_tract	6.36	-4.42
UMUC3	CHEK1	MAP2K_1	3	1	0.24	5.78	57.49	0.39	10	41	-13.54	urinary_tract	2.08	1.97
VMCUB1	CHEK1	MAP2K_1	3	1	0.12	10	34.47	0.34	10	24.5	-78.39	urinary_tract	-3.55	0.31
647V	CHEK1	MTOR_1	1	1	0.34	2.72	53.5	0.95	10	0	2.96	urinary_tract	5.52	1.64
BFTC905	CHEK1	MTOR_1	3	1	0.29	2.16	26.68	0.26	2.82	2.86	-49.73	urinary_tract	7.31	0.59
HT1376	CHEK1	MTOR_1	3	1	0.34	1.69	34.82	0.46	1.69	6.67	-12.91	urinary_tract	-1.97	18.6
J82	CHEK1	MTOR_1	3	1	0.87	0.96	8.29	0.33	10	45	-34.26	urinary_tract	2.22	3.56
T24	CHEK1	MTOR_1	3	1	0.76	2.64	15.87	0.23	5.49	1.47	-2.59	urinary_tract	1.89	1.64
TCCSUP	CHEK1	MTOR_1	1	1	0.26	2.14	50.96	0.27	10	6.6	-10.93	urinary_tract	1.15	3.33
UMUC3	CHEK1	MTOR_1	1	1	1	3.05	54.6	0.91	2.46	0	-6.55	urinary_tract	-2.49	0.39
VMCUB1	CHEK1	MTOR_1	1	1	0.59	1.91	0	0.34	0.89	0	-86.8	urinary_tract	-14.82	-2.93
647V	CHEK1	PARP1	3	1	3	1.27	74.11	0.96	10	0	42.13	urinary_tract	4.54	3.33
BFTC905	CHEK1	PARP1	3	1	3	1.15	6.75	0.26	1.86	0	-9.87	urinary_tract	4.4	1.73
C32	CHEK1	PARP1	10	1	4.45	1.48	3.82	0.62	3.32	0	-26.31	large_intestine	0.67	8.17
HT1197	CHEK1	PARP1	3	1	3	0.6	37	0.24	2.95	27.26	5.79	urinary_tract	2.52	3.33
HT1376	CHEK1	PARP1	3	1	3	0.3	81.86	0.34	10	28.7	10.39	urinary_tract	-0.64	2.62
HT29	CHEK1	PARP1	10	1	10	1.53	65.44	0.16	3.52	2.63	15.3	large_intestine	-3.03	-2.4
J82	CHEK1	PARP1	3	1	1.3	0.9	60.75	0.29	10	48	-46.89	urinary_tract	1.46	5.73
LS513	CHEK1	PARP1	10	0.3	10	0.97	5.84	0.12	10	59.09	-34.94	large_intestine	0.34	2.69
SW48	CHEK1	PARP1	10	0.3	6.19	0.96	0	0.11	2.59	7.58	-14.84	large_intestine	2.01	9.16
SW620	CHEK1	PARP1	3	0.3	3	0.1	76.65	0.19	2.42	0	21.04	large_intestine	5.29	-3.24
SW837	CHEK1	PARP1	10	0.3	1.53	1.33	0	0.06	1.39	0	10.4	large_intestine	3.89	17.63
SW948	CHEK1	PARP1	10	1	3.47	10	67.6	0.32	10	4.5	34.41	large_intestine	2.72	5.23
T24	CHEK1	PARP1	3	1	1.2	10	50.69	0.26	10	1.6	5.07	urinary_tract	0.58	3.33
TCCSUP	CHEK1	PARP1	3	1	3	0.78	28.61	0.22	3.69	5.38	10.36	urinary_tract	-1.51	14.61
UMUC3	CHEK1	PARP1	3	1	3	0.93	65.73	0.82	2.44	0	29.01	urinary_tract	-0.98	5.57
647V	CHEK1	PIK3C	3	1	2.3	0.89	3.41	0.37	10	26.8	-32.86	urinary_tract	10.3	3.11
HT1197	CHEK1	PIK3C	3	1	0.65	2.63	56.39	0.26	3.56	31.26	-18.18	urinary_tract	8.59	3.11
J82	CHEK1	PIK3C	3	1	0.71	0.95	23.16	0.33	10	48.9	-36.29	urinary_tract	7.38	15.06
T24	CHEK1	PIK3C	3	1	1.15	10	52.9	0.27	10	1.6	1.52	urinary_tract	0.61	3.11
TCCSUP	CHEK1	PIK3C	1	1	0.59	1.1	29.62	0.21	3.23	5.87	-28.85	urinary_tract	7.99	1.91
UMUC3	CHEK1	PIK3C	3	1	1.53	1.6	21.6	0.37	10	41	-4.82	urinary_tract	2.95	-1.54
647V	CHEK1	PIK3CB_PIK3CD	3	1	0.75	1.16	0	0.42	10	33.29	20.92	urinary_tract	6.55	0.65
BFTC905	CHEK1	PIK3CB_PIK3CD	3	1	0.23	0.87	26.38	0.24	1.74	0	-28.01	urinary_tract	9.77	1.04
HT1376	CHEK1	PIK3CB_PIK3CD	3	1	0.54	0.3	0	0.46	1.19	0	2.79	urinary_tract	9.56	18.41
J82	CHEK1	PIK3CB_PIK3CD	3	1	1.99	0.67	0	0.65	2.15	26.78	-23.19	urinary_tract	7.02	-0.67
T24	CHEK1	PIK3CB_PIK3CD	3	1	1.11	10	79.8	0.19	3.82	0.99	16.65	urinary_tract	3.31	0.65
TCCSUP	CHEK1	PIK3CB_PIK3CD	3	1	0.52	1.08	56.33	0.26	5.02	5.9	-0.88	urinary_tract	7.43	4.69
UMUC3	CHEK1	PIK3CB_PIK3CD	3	1	3	1.08	59.74	0.89	2.73	0	12.8	urinary_tract	2.04	-4.26
VMCUB1	CHEK1	PIK3CB_PIK3CD	3	1	3	0.76	54.83	0.34	10	8.7	-22.71	urinary_tract	1.32	0.21
647V	CHEK1	PIM1	3	1	0.13	1.11	90.81	0.41	10	31.89	-4.48	urinary_tract	15.06	7.18
BFTC905	CHEK1	PIM1	3	1	0.01	1.36	82.93	0.3	10	8.5	-11.77	urinary_tract	18.35	9.14
HT1197	CHEK1	PIM1	3	1	2.09	1.39	70.29	0.29	10	38.2	-9.63	urinary_tract	18.81	7.18
J82	CHEK1	PIM1	3	1	3	0.19	47.74	0.36	1.61	14.58	-31.51	urinary_tract	6.61	-6
T24	CHEK1	PIM1	3	1	1	0	100	0.27	10	1.9	-10.66	urinary_tract	4.25	7.18
TCCSUP	CHEK1	PIM1	3	1	0.1	1.45	83.67	0.2	2.94	4.84	-42.31	urinary_tract	6.35	2.47
UMUC3	CHEK1	PIM1	3	1	1	0	100	0.36	10	38.2	-5.65	urinary_tract	1.51	1.39
647V	CHEK1	SRC	3	1	3	0.64	78.93	0.35	10	29.3	-16.32	urinary_tract	5.68	1.6
HT1197	CHEK1	SRC	3	1	1	0	100	0.29	10	29.2	-21.78	urinary_tract	8.84	1.6
J82	CHEK1	SRC	3	1	0.34	1.23	72.9	0.33	10	43.6	-21.74	urinary_tract	6.83	-0.7
T24	CHEK1	SRC	3	1	0.84	2.2	22.43	0.26	10	2	2.69	urinary_tract	3.87	1.6
TCCSUP	CHEK1	SRC	3	1	0.93	2.29	66.26	0.23	3.83	6.1	20.6	urinary_tract	7.44	2.16
UMUC3	CHEK1	SRC	3	1	1.08	10	60.9	0.37	10	38.7	-33.24	urinary_tract	6.64	1.24
647V	Cisplatin	EG5	3	3	0	5.06	0	1.16	10	9.79	-32.67	urinary_tract	12.32	11
BFTC905	Cisplatin	EG5	3	3	0	2.89	0	0.53	1.34	0	6.71	urinary_tract	8.54	11
HT1197	Cisplatin	EG5	3	3	0	0.1	23.64	0.47	0.46	0	11.7	urinary_tract	11.79	11
HT1376	Cisplatin	EG5	0.1	3	0	3.66	28.92	0.78	0.77	0	5.63	urinary_tract	10.14	11
J82	Cisplatin	EG5	3	3	0	0.13	0	0.36	1.29	2.47	16.39	urinary_tract	11.26	-6.53
SW780	Cisplatin	EG5	3	3	0	0.98	79.48	1.24	3.94	67.63	-1.34	urinary_tract	0.93	-8.64
T24	Cisplatin	EG5	3	3	0	1.06	1.15	2.43	4.56	0	0.83	urinary_tract	16.63	11
TCCSUP	Cisplatin	EG5	3	3	0	10	0	0.52	1.83	9.41	-7.92	urinary_tract	15.65	4.39
UMUC3	Cisplatin	EG5	3	3	0	1.91	43.12	1.26	2.48	0	-3.38	urinary_tract	19.17	11
647V	Cisplatin	ERBB	0.1	3	0.03	10	91	1.16	10	11.19	21.34	urinary_tract	7.58	-1.65
BFTC905	Cisplatin	ERBB	3	3	1	0	100	0.59	1.6	0	22.21	urinary_tract	13.9	0.16
HT1197	Cisplatin	ERBB	3	3	0	0.1	87.77	0.55	0.5	2.75	-5.63	urinary_tract	3.49	-1.65
HT1376	Cisplatin	ERBB	1	3	0.01	10	46.5	0.58	1.68	31.74	-30.12	urinary_tract	-4.33	-9.47
J82	Cisplatin	ERBB	3	3	0	0.1	88.61	0.55	1.34	0	11.98	urinary_tract	7.69	18.42
T24	Cisplatin	ERBB	3	3	3	0.79	67.16	2.62	10	0	-7.77	urinary_tract	4.35	-1.65
TCCSUP	Cisplatin	ERBB	3	3	0.16	2.68	92.96	0.52	2.02	13.42	15.9	urinary_tract	8.12	15.74
UMUC3	Cisplatin	ERBB	3	3	1.11	10	78.9	1.36	2.64	0	15.69	urinary_tract	7.73	-3.68
VMCUB1	Cisplatin	ERBB	3	3	3	0.95	56.47	1.24	10	54.69	25.62	urinary_tract	-2.4	-5.52
HT1197	Cisplatin	FGFR	3	3	3	0.25	27.73	0.38	0.36	0	-10.85	urinary_tract	6.78	3.51
HT1376	Cisplatin	FGFR	3	3	3	10	62.4	0.94	2.07	28.83	-12.92	urinary_tract	-2.64	-2.19
UMUC3	Cisplatin	FGFR	3	3	3	0.19	84.62	1.17	2.16	0	-4.17	urinary_tract	9.78	2.9
647V	Cisplatin	Gemcitabine	0.1	3	0	4.15	0	1.19	2.12	0	1.94	urinary_tract	11.23	4.95
BFTC905	Cisplatin	Gemcitabine	0.1	3	0	4.37	1.7	0.48	1.37	0	-2.76	urinary_tract	5.21	4.95
HT1197	Cisplatin	Gemcitabine	0.1	3	0.01	1.87	20.17	0.31	0.67	14.78	-15.64	urinary_tract	10.35	4.95
HT1376	Cisplatin	Gemcitabine	0.1	3	0.01	2.16	20.65	1.62	0.68	0	-6.1	urinary_tract	0.23	4.95
J82	Cisplatin	Gemcitabine	0.1	3	0	3.28	4.71	0.5	1.18	0	-7.2	urinary_tract	3.55	7.6
KU1919	Cisplatin	Gemcitabine	0.1	3	0	3.74	7.38	2.39	1.84	0	-6.57	urinary_tract	5.66	4.95
SW780	Cisplatin	Gemcitabine	0.1	3	0	2.12	19.74	3	0.95	51.39	5.52	urinary_tract	-0.28	-3.75
TCCSUP	Cisplatin	Gemcitabine	0.1	3	0	1.91	6.12	0.52	1.39	5.7	-1.93	urinary_tract	9.6	11.11
UMUC3	Cisplatin	Gemcitabine	0.1	3	0.01	2.56	0.69	1.32	2.55	0	-9.88	urinary_tract	10.29	4.95
VMCUB1	Cisplatin	Gemcitabine	0.1	3	0.01	3.64	6.51	2.53	2.72	0	-10.84	urinary_tract	7.59	4.95
647V	Cisplatin	HDAC_4	3	3	1.19	1.6	0	1.24	3.01	0	10.04	urinary_tract	3.72	-10.41
HT1376	Cisplatin	HDAC_4	3	3	0.93	1.23	18.21	1.71	0.97	0	4.09	urinary_tract	-5.04	-11.11
UMUC3	Cisplatin	HDAC_4	3	3	1.33	3.86	20.12	1.25	2.46	0	2.15	urinary_tract	8.81	-10.3
647V	Cisplatin	HSP90	3	3	0.13	4.42	3.39	1.3	3.3	0	1.92	urinary_tract	12.28	10.21
BFTC905	Cisplatin	HSP90	3	3	0.1	2.11	0.69	0.69	3.04	5.25	2.84	urinary_tract	9.27	9.38
HT1197	Cisplatin	HSP90	3	3	0.11	3.04	30.73	0.9	10	36.4	-11.86	urinary_tract	12.24	10.21
HT1376	Cisplatin	HSP90	3	3	0.09	1.87	17.29	0.65	2.31	33.48	-1.26	urinary_tract	9.67	10.21
J82	Cisplatin	HSP90	3	3	0.08	1.93	14.46	0.51	1.6	5.43	18.93	urinary_tract	12.21	12.18
SW780	Cisplatin	HSP90	0.3	3	0.24	2.93	0	1.24	2.66	63.2	5.24	urinary_tract	1.66	2.81
TCCSUP	Cisplatin	HSP90	0.3	3	0.14	1.95	0	0.46	1.67	9.36	20.92	urinary_tract	15.22	12.05
UMUC3	Cisplatin	HSP90	0.3	3	0.15	3.16	0	1.25	2.41	0	23.41	urinary_tract	18.6	11.13
VMCUB1	Cisplatin	HSP90	0.3	3	0.14	2.65	0	2.23	2.3	0	-1.33	urinary_tract	3.5	2.75
647V	Cisplatin	IAP	3	3	0	2.18	17.16	1.55	3.82	3.01	25.45	urinary_tract	17.15	21.37
BFTC905	Cisplatin	IAP	3	3	0	0.21	0	0.56	1.64	0	36.34	urinary_tract	13.57	16.37
HT1197	Cisplatin	IAP	3	3	3	0.32	12.86	0.59	0.54	4.71	13.17	urinary_tract	18.31	21.37
HT1376	Cisplatin	IAP	3	3	0.24	0.27	0	1.56	0.8	0	26.51	urinary_tract	12.53	17.01
J82	Cisplatin	IAP	3	3	0	0.11	0	0.45	1.17	0	44.29	urinary_tract	15.11	-2.11
SW780	Cisplatin	IAP	0.03	3	0	0.9	46.89	3	1.54	32.67	0.66	urinary_tract	-14.54	-29.67
T24	Cisplatin	IAP	1	3	1	0.4	68.78	1.39	10	23.37	35.89	urinary_tract	17.9	21.37
TCCSUP	Cisplatin	IAP	0.03	3	0	0.61	66.49	0.51	1.85	11.16	64.08	urinary_tract	18.35	15.27
UMUC3	Cisplatin	IAP	0.03	3	0	0.7	59.01	1.32	2.64	0	35.41	urinary_tract	16.77	8.08
VMCUB1	Cisplatin	IAP	0.03	3	0.02	0.98	0	1.59	2.6	0	-5.36	urinary_tract	9.63	3.09
647V	Cisplatin	MAP2K_1	1	3	0.3	0.91	61.7	1.31	3.45	0	17.29	urinary_tract	15.53	9.16
BFTC905	Cisplatin	MAP2K_1	3	3	1.02	0.79	0	0.6	2.41	0.6	-8.7	urinary_tract	15.87	14.87
J82	Cisplatin	MAP2K_1	3	3	0.02	0.53	63.08	0.46	1.06	0	30.97	urinary_tract	11.05	3.35
SW780	Cisplatin	MAP2K_1	3	3	0.18	10	57.93	3	1.33	28.82	-60.24	urinary_tract	10.08	5.37
T24	Cisplatin	MAP2K_1	3	3	0.4	0.67	2.94	2.66	10	0	-7.1	urinary_tract	13.13	9.16
TCCSUP	Cisplatin	MAP2K_1	3	3	0.13	0.55	58.44	0.51	2.39	13.42	13.73	urinary_tract	18.86	-0.08
UMUC3	Cisplatin	MAP2K_1	3	3	0.24	4	54.1	1.21	3.64	5.72	3.49	urinary_tract	18	6.22
VMCUB1	Cisplatin	MAP2K_1	3	3	0.51	1	61.86	2.73	2.14	0	0.62	urinary_tract	13.38	9.48
647V	Cisplatin	MTOR_1	1	3	0.58	0.97	0	1.18	2.68	0	4.12	urinary_tract	13.71	4.59
BFTC905	Cisplatin	MTOR_1	3	3	0.16	1.21	20.73	0.41	1.12	0	17.59	urinary_tract	12.73	3.9
HT1197	Cisplatin	MTOR_1	3	3	1.01	1.14	26.45	0.63	0.95	21.41	13.41	urinary_tract	13.32	4.59
HT1376	Cisplatin	MTOR_1	3	3	0.67	0.93	20.18	1.72	0.96	0	-5.94	urinary_tract	5.8	2.25
J82	Cisplatin	MTOR_1	3	3	0.71	0.74	0	0.4	1.02	0	10.86	urinary_tract	10.72	0.45
SW780	Cisplatin	MTOR_1	3	3	0.52	1.98	29.08	1.11	10	71.8	-3.2	urinary_tract	0.37	-11.92
T24	Cisplatin	MTOR_1	3	3	0.75	2.23	11.48	2.23	3.02	0	-0.67	urinary_tract	10.56	4.59
TCCSUP	Cisplatin	MTOR_1	1	3	0.42	1.48	41.69	0.53	2.6	14.83	15.37	urinary_tract	15.63	9.92
UMUC3	Cisplatin	MTOR_1	1	3	0.39	10	69.9	1.35	2.78	0	13.19	urinary_tract	14.76	3.08
VMCUB1	Cisplatin	MTOR_1	1	3	0.3	1.6	34.99	2.13	2.11	0	0.76	urinary_tract	8.53	4.56
647V	Cisplatin	PARP1	3	3	3	0.7	68.04	1.45	3.2	0	22.71	urinary_tract	12.13	6.03
BFTC905	Cisplatin	PARP1	3	3	3	0.99	17.45	0.62	2.3	1.96	20.19	urinary_tract	8.59	4.78
HT1197	Cisplatin	PARP1	3	3	0.75	1.79	61.06	0.41	2.74	43.38	9.69	urinary_tract	11.86	6.03
BFTC905	Cisplatin	PIK3C	3	3	1.14	0.7	0	0.5	1.51	0	6.52	urinary_tract	10.17	2.28
HT1197	Cisplatin	PIK3C	3	3	2.49	0.41	1.95	0.18	0.61	19.82	-9.31	urinary_tract	9.55	2.28
J82	Cisplatin	PIK3C	3	3	1.54	0.64	0	0.49	1.15	0	5.22	urinary_tract	7.56	14.64
647V	Cisplatin	PIK3CB_PIK3CD	3	3	0.85	1.07	0	1.42	4.35	5.48	23.69	urinary_tract	8.4	1.67
BFTC905	Cisplatin	PIK3CB_PIK3CD	3	3	0.17	0.97	26.18	0.63	1.89	0	30.7	urinary_tract	8.98	4.03
HT1197	Cisplatin	PIK3CB_PIK3CD	3	3	0	0.1	66.35	0.93	0.6	0	22.62	urinary_tract	10.29	1.67
J82	Cisplatin	PIK3CB_PIK3CD	3	3	3	0.55	0	0.52	1.34	0	16.83	urinary_tract	6.49	5.64
SW780	Cisplatin	PIK3CB_PIK3CD	3	3	1	0	100	1.34	2.14	68.43	-33.52	urinary_tract	-14.33	-13.23
T24	Cisplatin	PIK3CB_PIK3CD	3	3	1.14	10	78.2	2.61	10	0	4.53	urinary_tract	3.59	1.67
TCCSUP	Cisplatin	PIK3CB_PIK3CD	3	3	0.54	0.76	56.41	0.49	2.01	11.95	35.58	urinary_tract	5.66	8.1
UMUC3	Cisplatin	PIK3CB_PIK3CD	3	3	3	1.14	62.91	1.33	2.65	0	23.7	urinary_tract	7.25	-5.02
647V	Cisplatin	PIM1	3	3	0.44	10	94.95	1.23	3.26	0	6.75	urinary_tract	16.94	13.58
BFTC905	Cisplatin	PIM1	3	3	3	0.18	62.69	0.43	1.27	0	8.99	urinary_tract	15.57	13.58
HT1197	Cisplatin	PIM1	3	3	1	0	100	0.44	1.4	39.27	26.24	urinary_tract	19.34	13.58
HT1376	Cisplatin	PIM1	3	3	0.21	0.66	71.21	1.5	0.76	0	19.97	urinary_tract	10.76	13.58
J82	Cisplatin	PIM1	3	3	3	0.39	60.52	0.49	1.23	0	21.66	urinary_tract	13.44	-5.98
SW780	Cisplatin	PIM1	3	3	3	10	91.4	3	1.57	31.06	-14.43	urinary_tract	7.09	-9.03
T24	Cisplatin	PIM1	3	3	1	0	100	2.73	10	0	-14.4	urinary_tract	12.64	13.58
TCCSUP	Cisplatin	PIM1	3	3	0.29	10	89.05	0.51	2.37	13.94	22.61	urinary_tract	17.56	12.33
UMUC3	Cisplatin	PIM1	3	3	1	0	100	1.27	2.54	0	3.69	urinary_tract	18.57	13.58
VMCUB1	Cisplatin	PIM1	3	3	0	0.1	88.93	1.18	10	44.8	-15.38	urinary_tract	9.29	13.58
647V	Cisplatin	SRC	3	3	3	10	74.8	1.53	3.36	0	3.19	urinary_tract	8.16	7.98
BFTC905	Cisplatin	SRC	1	3	1	10	50.2	0.54	1.37	0	5.62	urinary_tract	9.61	8.51
HT1197	Cisplatin	SRC	3	3	0	0.1	71.43	0.81	0.48	0	12.51	urinary_tract	11.19	7.98
HT1376	Cisplatin	SRC	3	3	3	1.05	5.63	0.91	1.26	18.72	4.22	urinary_tract	9.21	7.98
J82	Cisplatin	SRC	3	3	3	0.39	45.09	0.49	1.07	0	24.18	urinary_tract	9.66	3.34
T24	Cisplatin	SRC	3	3	0.69	1.7	20.72	2.12	3.2	0	-6.88	urinary_tract	5.63	7.98
TCCSUP	Cisplatin	SRC	3	3	0.86	1.12	64.96	0.52	2.6	14.87	16.95	urinary_tract	12.82	12.35
UMUC3	Cisplatin	SRC	3	3	3	1.36	27.61	1.35	2.37	0	14.18	urinary_tract	12.18	8
VMCUB1	Cisplatin	SRC	1	3	0	0.1	90.94	2.9	2.81	0	-8.18	urinary_tract	6.53	7.76
647V	EG5	ERBB	0.1	3	0.03	1.53	76.99	0	10	0	-14.4	urinary_tract	14.42	-1.62
BFTC905	EG5	ERBB	3	3	0	0.1	89.35	0	10	0	21.05	urinary_tract	35.62	-0.82
HT1376	EG5	ERBB	1	0.1	0.05	0.91	30.1	0	3.85	29.41	12.2	urinary_tract	14.26	-4.31
J82	EG5	ERBB	3	3	0	8.37	90.24	0	0.13	0	6.86	urinary_tract	21.94	8.93
SW780	EG5	ERBB	3	3	1	0	100	0	0.1	93.93	-53.03	urinary_tract	-29.49	-46.73
T24	EG5	ERBB	3	3	3	10	93	0	9.88	1.16	-0.97	urinary_tract	-1.21	-1.62
TCCSUP	EG5	ERBB	3	3	3	0.19	74.58	0	4.1	0	1.11	urinary_tract	16.83	7.11
UMUC3	EG5	ERBB	3	3	3	1.5	52.5	0	2.04	61.7	-5.48	urinary_tract	0.09	-5.49
647V	EG5	FGFR	3	3	1	0	100	0	4.6	0	-4.84	urinary_tract	-7.46	4.22
BFTC905	EG5	FGFR	3	3	1.15	10	78.3	0	10	0	3.45	urinary_tract	-12.53	5.18
HT1197	EG5	FGFR	3	3	1	10	72.7	0	0.1	39.01	-27.83	urinary_tract	-5.21	4.22
HT1376	EG5	FGFR	3	0.1	3	1.82	39.89	0	4.73	33.63	4.62	urinary_tract	-2.42	2.88
J82	EG5	FGFR	3	3	0.56	0.59	42.83	0	0.12	0	31.67	urinary_tract	5.11	14.13
SW780	EG5	FGFR	3	3	3	10	68.8	1	0	100	10.7	urinary_tract	-0.99	-2.95
T24	EG5	FGFR	3	3	1	0	100	0	1.56	0.81	0.85	urinary_tract	-4.87	4.22
TCCSUP	EG5	FGFR	3	3	0.03	0.97	53.58	0	10	33.78	2.51	urinary_tract	12.13	16.8
UMUC3	EG5	FGFR	3	3	1	0	100	0	3.58	63.2	1.67	urinary_tract	-3.85	-0.85
647V	EG5	HDAC_4	3	3	0.6	3.42	22.76	0	10	0	-38.67	urinary_tract	-1.31	-10.61
BFTC905	EG5	HDAC_4	3	3	0.29	10	21.9	0	3.88	0	-11.02	urinary_tract	-1.35	-9.28
HT1197	EG5	HDAC_4	3	3	1.05	10	40.5	0	0.1	59.53	3.97	urinary_tract	1.73	-10.61
HT1376	EG5	HDAC_4	3	0.1	0.9	0.71	0	0	3.26	27.76	-20.02	urinary_tract	-4.79	-10.64
J82	EG5	HDAC_4	3	3	1.09	2.87	22.82	0	0.1	0	-6.75	urinary_tract	3.93	-7.91
SW780	EG5	HDAC_4	3	3	1.1	0.6	0	1	0	100	7.81	urinary_tract	4.69	8.15
T24	EG5	HDAC_4	3	3	1.22	10	16.99	0.02	10	1.15	0.66	urinary_tract	-4.99	-10.61
TCCSUP	EG5	HDAC_4	3	3	0.68	1.56	4.99	0	10	0	-5.12	urinary_tract	6.48	6.25
UMUC3	EG5	HDAC_4	3	3	1.15	10	28.2	0	10	69.2	-12.16	urinary_tract	3.24	-10.61
647V	EG5	HSP90	3	3	0.13	4.08	4.52	0	8.14	1.49	-21.26	urinary_tract	11.02	14.1
BFTC905	EG5	HSP90	3	3	0.1	2.42	1.03	0	3.56	0	-4.11	urinary_tract	12.74	9.67
HT1197	EG5	HSP90	3	3	0.12	1.44	19.9	0	0.1	37.04	11.83	urinary_tract	10.65	14.1
HT1376	EG5	HSP90	0.03	0.1	0.01	10	74.8	0	2.64	32.28	4.82	urinary_tract	7.82	14.1
J82	EG5	HSP90	3	3	0.1	3.12	24.14	0	0.1	0	32.81	urinary_tract	13.2	5.56
SW780	EG5	HSP90	0.3	3	0.25	2.36	0	0	0.28	89.79	0.32	urinary_tract	9.91	10.48
T24	EG5	HSP90	0.3	3	0.09	10	9.6	0	1.61	1.25	-7.88	urinary_tract	11.79	14.1
TCCSUP	EG5	HSP90	0.3	3	0.14	2.26	5.43	0	10	0	-24.79	urinary_tract	10.54	9.78
UMUC3	EG5	HSP90	0.3	3	0.11	10	17	0	10	74	-9.68	urinary_tract	12.86	14.1
647V	EG5	IAP	3	3	0	1.83	7.96	0	10	0	-12.72	urinary_tract	22.81	21.22
BFTC905	EG5	IAP	3	3	0	0.44	9.79	0	2.79	0	5.5	urinary_tract	19.52	15.08
HT1197	EG5	IAP	3	3	3	0.27	38.1	0	0.1	25.85	26.23	urinary_tract	24	21.22
HT1376	EG5	IAP	0.03	0.1	0	0.35	23.52	0	3.6	25.84	45.1	urinary_tract	14.67	18.58
J82	EG5	IAP	3	3	0.02	1.98	27.69	0	0.12	0	42.18	urinary_tract	13.61	-8.32
SW780	EG5	IAP	0.03	3	0	0.83	46.5	1	0	100	-2.67	urinary_tract	17.01	-39.73
T24	EG5	IAP	1	3	1	10	91.8	0	8.49	1.58	5.11	urinary_tract	34.02	21.22
TCCSUP	EG5	IAP	0.03	3	0	0.66	68.38	0	10	0	20.72	urinary_tract	30.18	2.9
UMUC3	EG5	IAP	0.03	3	0	1.66	70.72	0	10	84.89	8.7	urinary_tract	13.21	10.28
647V	EG5	MTOR_1	1	3	0.48	1.67	23.91	0	5.76	0	-14.55	urinary_tract	12.59	4.38
BFTC905	EG5	MTOR_1	3	3	0.25	1.51	24.95	0	6.38	0	7.02	urinary_tract	16.51	0.38
HT1197	EG5	MTOR_1	3	3	0.3	10	47.6	0	0.1	38.68	35.5	urinary_tract	8.61	4.38
HT1376	EG5	MTOR_1	3	0.1	0.72	0.73	11.86	0	4.55	29.89	0.8	urinary_tract	6.96	3.85
J82	EG5	MTOR_1	3	3	0.84	0.68	0	0	0.13	0	27.3	urinary_tract	8.38	-9.18
SW780	EG5	MTOR_1	3	3	0.61	2.18	31.39	1	0	100	1.28	urinary_tract	4.04	-5.5
T24	EG5	MTOR_1	3	3	0.96	10	21.6	0	1.67	1.07	1.85	urinary_tract	8.08	4.38
TCCSUP	EG5	MTOR_1	1	3	0.39	0.97	25.65	0	3.15	0	-14.03	urinary_tract	12.01	0.67
UMUC3	EG5	MTOR_1	1	3	0.37	10	70.4	0	3.05	53.21	-5.54	urinary_tract	5.09	0.48
VMCUB1	EG5	MTOR_1	1	3	1	0.47	10.6	0	1.13	87.01	-28.72	urinary_tract	2.64	1.21
647V	EG5	PARP1	3	3	3	0.57	78.56	0	5.62	0	-10.81	urinary_tract	3.83	6.93
UMUC3	EG5	PARP1	3	3	3	0.68	84.87	0	10	87.5	-6.52	urinary_tract	4.99	9.02
VMCUB1	EG5	PARP1	3	3	0.4	10	73.8	1	0	100	-38.76	urinary_tract	-4.95	-4.53
647V	EG5	PIK3C	3	3	0.86	1.84	50.26	0	10	0	-9.66	urinary_tract	5.1	2.52
BFTC905	EG5	PIK3C	3	3	0.59	1.03	23.13	0	10	23.68	-33.19	urinary_tract	25.84	2.52
HT1197	EG5	PIK3C	3	3	0.32	10	71	0	0.1	46.25	59.89	urinary_tract	0.4	2.52
HT1376	EG5	PIK3C	3	0.1	1.02	0.71	0	0	3.02	28.65	6.79	urinary_tract	-2.81	5.91
J82	EG5	PIK3C	3	3	1.13	0.95	15.09	0	0.1	0	26.32	urinary_tract	2.23	8.95
SW780	EG5	PIK3C	3	3	3	10	77.6	0	10	90	-42.4	urinary_tract	-6.37	-22.45
T24	EG5	PIK3C	3	3	1.04	10	56.2	0	0.95	0.51	2.2	urinary_tract	-17.04	2.52
TCCSUP	EG5	PIK3C	1	3	0.34	3.26	55.88	0	10	0	-3.84	urinary_tract	8.64	1.04
UMUC3	EG5	PIK3C	3	3	1.57	1.63	26.42	0	2.2	75.72	-8.02	urinary_tract	-1.47	-4.51
VMCUB1	EG5	PIK3C	3	3	2.55	2.32	0	0	10	88.4	6.93	urinary_tract	8.76	13.14
J82	EG5	PIK3CB_PIK3CD	3	3	0.87	0.38	0	0	0.15	0	15.53	urinary_tract	6.68	-11.88
SW780	EG5	PIK3CB_PIK3CD	3	3	1	0	100	1	0	100	-28.27	urinary_tract	-12.26	1.52
TCCSUP	EG5	PIK3CB_PIK3CD	3	3	3	0.58	34.88	0	10	0	5	urinary_tract	8.49	1
647V	EG5	PIM1	3	3	1	0	100	0	10	0	0.32	urinary_tract	22.2	11.11
BFTC905	EG5	PIM1	3	3	1.06	10	93	0	10	0	23.01	urinary_tract	29.83	11.11
VMCUB1	EG5	PIM1	3	3	1	0	100	1	0	100	-22.06	urinary_tract	7.57	11.11
647V	EG5	SRC	3	3	3	10	75.4	0	5.2	0	-10.03	urinary_tract	7.29	4.59
BFTC905	EG5	SRC	1	3	1	2.38	44.86	0	10	0	10.85	urinary_tract	10.15	2.33
HT1197	EG5	SRC	3	3	0	0.1	92.18	0.01	0.72	48.91	13.25	urinary_tract	9.91	4.59
HT1376	EG5	SRC	3	0.1	0.93	10	54	0	4.51	31.99	-8.18	urinary_tract	10.88	5.61
J82	EG5	SRC	3	3	3	0.54	49.78	0	0.11	0	14.61	urinary_tract	8.88	3.79
T24	EG5	SRC	3	3	0.97	10	29.4	0	1.33	1.01	-0.2	urinary_tract	6.48	4.59
TCCSUP	EG5	SRC	3	3	3	0.46	32.59	0	3.41	0	-14.28	urinary_tract	9.46	4.18
UMUC3	EG5	SRC	3	3	1.13	4.87	55.73	0	10	83.1	-3.22	urinary_tract	7.95	3.99
VMCUB1	EG5	SRC	1	3	0	0.1	86.64	1	0	100	7.67	urinary_tract	3.71	2
BFTC905	ERBB	FGFR	3	3	3	1.87	30.2	0.45	1.06	74.41	-3.04	urinary_tract	33.32	-10.27
CAMA1	ERBB	FGFR	1	1	1	10	92.2	0.34	10	93.2	-14.78	breast	-7.61	-14.6
HCC1187	ERBB	FGFR	1	1	0.01	1.86	89.41	0	8.5	94.74	-10.91	breast	7.7	-0.97
HCC1806	ERBB	FGFR	1	1	1	0	100	1	0	100	1.91	breast	8.64	-3.89
HCC1937	ERBB	FGFR	1	1	0	0.1	92.99	0.01	1.67	79.72	44.42	breast	25.38	16.15
MCF 7,00	ERBB	FGFR	3	3	1.06	10	51.4	0.14	10	80.6	20.76	breast	16.07	-3.68
MDAMB468	ERBB	FGFR	1	1	1	10	76.8	0.18	10	93.49	13.01	breast	48.61	-7.87
NCIH1703	ERBB	FGFR	3	3	1.91	1.36	0	1.59	1.33	0	43.46	lung	11.53	4.57
TCCSUP	ERBB	FGFR	3	3	0.03	1.41	53.88	0	0.1	80.37	61.16	urinary_tract	19.01	17.22
UMUC3	ERBB	FGFR	3	3	1	0	100	1.14	10	73.1	43.38	urinary_tract	3.51	-7.94
VMCUB1	ERBB	FGFR	3	3	0	0.1	82.69	3	0.41	33.67	71.66	urinary_tract	1.64	-5.82
647V	ERBB	Gemcitabine	0.1	0.1	0	4.08	0	0.02	1.9	73.07	5.95	urinary_tract	5.97	-0.24
KU1919	ERBB	Gemcitabine	0.1	3	0	4.3	8.31	1	0	100	1.43	urinary_tract	5.78	-1.09
UMUC3	ERBB	Gemcitabine	0.1	3	0.01	2.83	1.15	3	1.81	53.57	-4.24	urinary_tract	3.77	-2.56
647V	ERBB	HDAC_4	3	0.1	1.3	1.5	0	0.1	1.06	60.94	12.43	urinary_tract	12.81	-8.86
BFTC905	ERBB	HDAC_4	3	3	0.31	10	23.9	0.31	1.33	64.44	19.8	urinary_tract	30.65	-6.2
BT474	ERBB	HDAC_4	1	1	1	0	100	0.11	1.58	1.07	6.16	breast	6.53	-11.32
HCC1419	ERBB	HDAC_4	1	1	1	0	100	0.18	2.02	25.17	15.14	breast	16.12	17.5
HCC1500	ERBB	HDAC_4	1	1	0.36	10	81.5	1	0	100	9.84	breast	7	-9.41
HT1197	ERBB	HDAC_4	3	3	0.97	1.22	8.78	1	0	100	-6.77	urinary_tract	8.65	-8.86
HT1376	ERBB	HDAC_4	3	1	0.43	1.73	28.32	0.07	0.73	32.28	3.27	urinary_tract	11.31	-15.15
J82	ERBB	HDAC_4	3	3	1.04	5.9	17.14	3	0.22	77.17	2.78	urinary_tract	15.63	15.52
MCF 7,00	ERBB	HDAC_4	1	1	0.51	2.36	53.35	1	0	100	51.98	breast	14.78	-2.1
MDAMB361	ERBB	HDAC_4	1	1	0.32	10	34.8	1	0.58	29.85	14.29	breast	25.78	-1.5
SW780	ERBB	HDAC_4	3	3	0.91	0.54	0	1	0	100	-31.62	urinary_tract	-26.42	-4.88
T24	ERBB	HDAC_4	3	3	1.15	10	17.19	3	10	77.4	6.47	urinary_tract	0.84	-8.86
T47D	ERBB	HDAC_4	1	1	0	0.1	87.97	0.03	10	87.7	11.05	breast	12.24	9.94
TCCSUP	ERBB	HDAC_4	3	3	0.69	1.58	3.87	0.03	10	92.7	22.46	urinary_tract	14.79	7.88
UACC812	ERBB	HDAC_4	1	1	1	2.33	56.49	0	0.61	28.36	-6.11	breast	1.69	-8.21
UMUC3	ERBB	HDAC_4	3	3	1.13	10	25.5	3	1.93	42.23	-2.32	urinary_tract	1.84	-8.86
VMCUB1	ERBB	HDAC_4	3	3	1.2	0.55	0	3	0.63	41.01	-71.94	urinary_tract	2.02	-7.29
647V	ERBB	HSP90	3	0.1	0.13	4.03	3.57	0.1	1.02	50.31	1.89	urinary_tract	14.52	2.02
BFTC905	ERBB	HSP90	3	3	0.09	3.28	2.96	0.59	10	93.14	-4.59	urinary_tract	33.31	3.55
BT474	ERBB	HSP90	1	1	0.04	2.37	5.65	0.09	1.28	0	3.32	breast	10.09	-7.52
CAMA1	ERBB	HSP90	1	1	0.17	1.18	7.84	1	0	100	32.6	breast	-0.53	-5.31
HCC1419	ERBB	HSP90	1	1	0.08	1.7	13.77	0.26	4.67	28.77	-8.5	breast	18.55	24.45
HCC1500	ERBB	HSP90	1	1	0.06	2.36	0	0	0.46	93.14	8.93	breast	11.29	18.22
HT1197	ERBB	HSP90	3	3	0.13	1.73	22.05	1	0	100	-1.66	urinary_tract	8.79	2.02
HT1376	ERBB	HSP90	3	1	0.07	1.54	12.47	0.04	0.59	36.39	3.37	urinary_tract	14.9	-6.14
J82	ERBB	HSP90	3	3	0.1	1.91	13.86	0.1	10	92.17	11.02	urinary_tract	21.48	18.12
MCF 7,00	ERBB	HSP90	1	1	0.03	2.94	10.33	1	0.59	79.53	15.39	breast	19.89	13.39
MDAMB361	ERBB	HSP90	1	1	0.11	2.32	6.01	1	0.54	26.11	-2.09	breast	32.44	4.65
SW780	ERBB	HSP90	0.3	3	0.26	2.75	0	1	0	100	-6.59	urinary_tract	-25.44	-41.28
T24	ERBB	HSP90	0.3	3	0.09	10	7.5	3	10	68.2	0.81	urinary_tract	2.67	2.02
T47D	ERBB	HSP90	1	1	0.07	5.07	23.98	0.02	1.53	88.91	-3.9	breast	16.42	12.24
TCCSUP	ERBB	HSP90	0.3	3	0.13	2.41	5.2	0.03	1.58	89.73	-3.52	urinary_tract	16.44	8.11
UACC812	ERBB	HSP90	1	1	0.03	10	0	0	0.11	0	28.75	breast	4.12	2.02
UMUC3	ERBB	HSP90	0.3	3	0.11	10	13.19	1.18	10	73.6	-2.59	urinary_tract	4.62	1.36
VMCUB1	ERBB	HSP90	0.3	3	0.16	3.05	0	3	0.65	38.57	15.06	urinary_tract	2	-8.64
BFTC905	ERBB	IAP	3	3	0	0.27	0	3	0.55	48.8	-8.97	urinary_tract	30.1	0.61
HT1197	ERBB	IAP	3	3	1.16	10	70.9	1	0	100	7.9	urinary_tract	6.09	0.9
HT1376	ERBB	IAP	3	1	0.09	0.19	0	0.1	1.2	43	73.73	urinary_tract	9.51	-8.15
647V	ERBB	MAP2K_1	1	0.1	0.24	1.25	68.93	0.03	10	81.8	25.39	urinary_tract	29.32	26.18
BFTC905	ERBB	MAP2K_1	3	3	1.52	1.09	0.16	3	0.22	80	107.56	urinary_tract	58.75	25.82
HCC1187	ERBB	MAP2K_1	1	1	0.03	0.95	54.14	1	0	100	23.45	breast	25	16.5
HCC1395	ERBB	MAP2K_1	1	1	0.2	0.8	79.57	1	0	100	18.32	breast	24.99	16.16
HCC1428	ERBB	MAP2K_1	1	1	1	0	100	0.32	10	88.2	-11.9	breast	-5.98	-5.84
J82	ERBB	MAP2K_1	3	3	3	0.26	21.03	0.45	0.38	76.99	2.13	urinary_tract	23.98	17.83
MDAMB157	ERBB	MAP2K_1	1	1	0.09	10	75.8	1	1.55	75.4	31.93	breast	20.75	26.18
T24	ERBB	MAP2K_1	3	3	0.22	1.26	28.48	3	10	86.4	53.41	urinary_tract	19.5	26.18
BFTC905	ERBB	MTOR_1	3	3	0.36	2.26	26.04	0.28	10	91.45	7.43	urinary_tract	35.33	10.31
BT549	ERBB	MTOR_1	1	1	0.28	2.17	27.11	1	0	100	2.39	breast	5.09	11.03
CAL148	ERBB	MTOR_1	1	1	0.2	1.07	71.23	1	0	100	-8.48	breast	2.26	8.91
HCC1419	ERBB	MTOR_1	1	3	0.14	1.91	23.03	0.13	1.21	19.25	16.83	breast	18.83	6.91
HCC38	ERBB	MTOR_1	1	1	1	0.99	26	1	0.98	63.03	14.11	breast	20.12	8.67
HT1376	ERBB	MTOR_1	3	1	0.51	0.84	21.22	0.1	10	50.95	21.46	urinary_tract	19.46	7.02
J82	ERBB	MTOR_1	3	3	0.67	1.17	17.18	0	0.1	88.24	4.23	urinary_tract	20.05	14.08
MCF 7,00	ERBB	MTOR_1	1	3	0.03	0.85	3.45	0	0.55	65.55	8.46	breast	21.63	7.48
MDAMB436	ERBB	MTOR_1	1	3	0.05	0.88	38.06	3	0.47	81.5	4.26	breast	5.76	1.53
T47D	ERBB	MTOR_1	1	3	0.08	1.08	11.36	3	0.48	32.88	36.38	breast	16.19	11.76
UMUC3	ERBB	MTOR_1	1	3	1	2.42	49.82	3	2.06	64.6	7.15	urinary_tract	4.59	7.53
VMCUB1	ERBB	MTOR_1	1	3	0.13	10	42.04	3	0.58	36.18	1.73	urinary_tract	9.75	14.56
647V	ERBB	PARP1	3	0.1	3	1.75	56.94	0.1	1.14	51.59	0.47	urinary_tract	14.74	-0.04
BFTC905	ERBB	PARP1	3	3	2.75	1.26	0	3	0.2	74.81	58.05	urinary_tract	35.37	-0.18
HT1197	ERBB	PARP1	3	3	3	0.24	25.97	0	0.1	86	-4.83	urinary_tract	8.28	-0.04
HT1376	ERBB	PARP1	3	1	3	0.49	66.2	0.06	0.95	43.24	4.69	urinary_tract	13.75	-10.77
J82	ERBB	PARP1	3	3	0.1	1.15	81.64	0	0.1	66.57	-15.22	urinary_tract	21.41	11.67
SW780	ERBB	PARP1	3	3	1	0	100	1	0	100	-45.92	urinary_tract	-27.32	-14.04
T24	ERBB	PARP1	3	3	2.9	2.21	0	3	1.74	59.62	3.88	urinary_tract	-0.41	-0.04
TCCSUP	ERBB	PARP1	3	3	3	0.53	30.4	0	0.1	84.08	9.19	urinary_tract	16.99	11.15
UMUC3	ERBB	PARP1	3	3	3	2.3	77.61	1.14	10	76.2	2.87	urinary_tract	1.49	-3.21
647V	ERBB	PIK3C	3	0.1	1.14	3.14	58.39	0.1	1.44	71.75	39.17	urinary_tract	10.69	-4.16
BFTC905	ERBB	PIK3C	3	3	2.41	0.89	0	1	0	100	47.08	urinary_tract	26.6	-4.16
BT20	ERBB	PIK3C	3	3	1.76	1.17	0	0	0.1	67.99	39.04	breast	20.3	-4.16
BT474	ERBB	PIK3C	3	3	0.48	2.2	3.21	0.42	1.3	0	48.51	breast	8.34	-1.88
BT549	ERBB	PIK3C	1	1	0.3	10	39.3	1	0	100	8.29	breast	-4.11	-4.16
CAL120	ERBB	PIK3C	1	1	1	0.54	39.91	1	0.11	76.26	4.64	breast	-4.06	-4.16
CAL148	ERBB	PIK3C	1	1	1	0.98	2.94	0.01	10	94	-2.67	breast	-5.75	-5.56
CAL51	ERBB	PIK3C	1	1	0.33	1.81	47.44	0.31	10	87.6	12.36	breast	6.66	-0.03
CAMA1	ERBB	PIK3C	3	3	1.19	10	29.29	1	0	100	20.45	breast	-16.12	-4.16
HCC1187	ERBB	PIK3C	3	3	1	0	100	1	0	100	-24.36	breast	7.36	12.26
HCC1395	ERBB	PIK3C	3	3	1.16	1.22	23.4	0.18	10	94.78	20.19	breast	16.96	-5.23
HCC1419	ERBB	PIK3C	3	3	0.37	1.04	16.83	0.15	1.02	16.04	34.31	breast	11.58	15.09
HCC1428	ERBB	PIK3C	1	1	1	10	73.2	1	0	100	1.06	breast	0.28	-0.24
HCC1569	ERBB	PIK3C	3	3	0	0.1	56.03	0	0.1	55.57	-27.45	breast	10.53	-4.4
HCC1806	ERBB	PIK3C	1	1	0.29	3.42	19.11	1	0	100	2.97	breast	4.22	11.49
HCC1937	ERBB	PIK3C	1	1	0.48	0.82	47.5	0.01	10	80.57	28.4	breast	16.07	9.35
HCC1954	ERBB	PIK3C	3	3	1.01	1.5	0	0.05	0.72	23.65	45.87	breast	28.17	6.99
HCC38	ERBB	PIK3C	1	1	1	0.54	53.4	0.02	1.23	82.17	5.34	breast	10.3	1.18
HCC70	ERBB	PIK3C	1	1	0.75	1.13	0	1	0	100	-22.93	breast	9.1	-2.05
HT1197	ERBB	PIK3C	3	3	0.75	1.16	38.92	1.6	0.98	82.75	22.68	urinary_tract	6.92	-4.16
HT1376	ERBB	PIK3C	3	1	1.15	1.2	22.08	0.1	1.6	56.88	44.55	urinary_tract	10.97	-4.08
J82	ERBB	PIK3C	3	3	1.84	0.61	0	0	0.1	84.08	21.66	urinary_tract	10.8	19.44
MCF 7,00	ERBB	PIK3C	3	3	0.15	0.89	0	0	0.1	61.07	22.85	breast	16.74	9.27
MDAMB157	ERBB	PIK3C	3	3	3	0.3	11.4	3	0.22	38.58	11.97	breast	12.09	-4.16
MDAMB361	ERBB	PIK3C	3	3	0.3	1.15	11.29	0.34	0.88	32.91	69.98	breast	24.34	4.8
MDAMB415	ERBB	PIK3C	3	3	2.27	2.35	18.96	1	0	100	9.09	breast	8.96	3.69
MDAMB436	ERBB	PIK3C	3	3	3	0.78	23.63	3	1.16	84.44	8.1	breast	-3.41	-4.34
MDAMB453	ERBB	PIK3C	3	3	0.81	0.87	0	3	0.71	22.45	16.55	breast	0.99	-3.89
MDAMB468	ERBB	PIK3C	3	3	2.01	1.31	0	3	0.21	15.56	85.62	breast	38.26	-4.16
T24	ERBB	PIK3C	3	3	1.06	10	48.2	3	1.08	54.98	10.62	urinary_tract	1.76	-4.16
T47D	ERBB	PIK3C	3	3	0.16	1.04	11.9	3	0.35	26.68	32.71	breast	8.65	11.86
TCCSUP	ERBB	PIK3C	1	3	0.44	1.63	44.72	3	1.74	82.05	30.57	urinary_tract	12.23	7.56
UMUC3	ERBB	PIK3C	3	3	1.08	3.64	49.38	3	1.61	63.79	36.14	urinary_tract	0.95	-4.37
VMCUB1	ERBB	PIK3C	3	3	3	1.74	27.2	0.15	1	81.06	82.94	urinary_tract	1.41	3.64
647V	ERBB	PIM1	3	0.1	1	0	100	0.03	10	85.9	32.59	urinary_tract	20.32	0.87
BFTC905	ERBB	PIM1	3	3	1	0	100	0.03	1.46	74.82	-54.43	urinary_tract	38.86	5.44
HT1197	ERBB	PIM1	3	3	0.61	10	90.27	1	0	100	-23.22	urinary_tract	16.68	0.87
HT1376	ERBB	PIM1	3	1	0.18	10	91.29	0.25	0.76	31.1	45.41	urinary_tract	19.18	-6.6
J82	ERBB	PIM1	3	3	0.21	10	77.85	0.02	1.63	84.76	24.62	urinary_tract	19.2	17.04
SW780	ERBB	PIM1	3	3	1	0	100	1	0	100	-42.75	urinary_tract	-20.07	-47.66
T24	ERBB	PIM1	3	3	1	0	100	3	10	92.6	-28.5	urinary_tract	5.14	0.87
TCCSUP	ERBB	PIM1	3	3	2.3	0.55	71.67	3	0.25	77.04	31.36	urinary_tract	18.3	11.97
UMUC3	ERBB	PIM1	3	3	1	0	100	3	1.34	51.36	0.83	urinary_tract	6.53	-3.66
647V	ERBB	SRC	3	0.1	3	10	81.2	0.04	3.54	84.27	-2.2	urinary_tract	12.93	-1.21
HT1376	ERBB	SRC	3	1	0.9	1.25	55.73	0.12	1.3	45.1	9.09	urinary_tract	18.83	-7.81
J82	ERBB	SRC	3	3	0.28	0.84	67.24	0	0.1	82.06	19.61	urinary_tract	13.96	26.32
T24	ERBB	SRC	3	3	1.01	4.65	28.04	3	10	91.6	21.46	urinary_tract	3.62	-1.21
TCCSUP	ERBB	SRC	3	3	3	0.48	31.42	3	0.2	71.92	8.43	urinary_tract	16.55	14.8
UMUC3	ERBB	SRC	3	3	3	1.14	20.01	3	1.56	41.02	-4.84	urinary_tract	4.67	-2.51
647V	ERBB	TNF	0.1	0.1	0	0.1	94.57	0.1	1.51	52.81	-8.89	urinary_tract	16.38	6.16
BFTC905	ERBB	TNF	0.1	3	0.01	0.7	25.34	3	0.12	34.7	6.7	urinary_tract	33.86	7.26
HT1197	ERBB	TNF	0.1	3	0	2.02	53.69	0	0.1	90.88	5.43	urinary_tract	11.16	6.16
HT1376	ERBB	TNF	0.1	1	0	0.98	65.97	0.58	0.49	0	70.82	urinary_tract	15.24	-1.62
J82	ERBB	TNF	0.1	3	0.1	1.22	60.36	0.01	1.17	88.88	23.72	urinary_tract	21.71	26.47
SW780	ERBB	TNF	0.03	3	0	1.25	87.92	1	0	100	-86.88	urinary_tract	-25.12	-28.4
T24	ERBB	TNF	0.03	3	0.03	2.19	94.21	1.72	1.59	71.21	-5.46	urinary_tract	5.46	6.16
TCCSUP	ERBB	TNF	0.03	3	0	0.1	74.8	0.01	0.38	88.53	25.71	urinary_tract	19.03	22.7
UMUC3	ERBB	TNF	0.03	3	0.03	0.29	29.35	1.1	10	81.2	-22.98	urinary_tract	3.89	5.46
647V	ERBB	TNFSF10	0.03	0.1	1	0	100	0.03	10	81.8	20.51	urinary_tract	13.78	-2.08
BFTC905	ERBB	TNFSF10	0.03	3	0.01	0.92	42.76	0.03	10	77.02	-60.28	urinary_tract	34.11	-1.49
HT1197	ERBB	TNFSF10	0.03	3	0	10	93.41	0.03	10	88.22	-8.83	urinary_tract	7.04	-2.08
HT1376	ERBB	TNFSF10	0.03	1	1	0	100	0.08	0.58	43.5	-11.26	urinary_tract	12.8	-7.5
J82	ERBB	TNFSF10	0.03	3	0	10	90.2	0.04	1.25	88.51	-0.5	urinary_tract	21.27	27.57
T24	ERBB	TNFSF10	0.03	3	0.01	10	50.7	1.13	10	82.7	14.91	urinary_tract	-1.53	-2.08
TCCSUP	ERBB	TNFSF10	0.03	3	0.01	2.71	44.63	3	0.22	74.82	8.84	urinary_tract	16.4	17.74
UMUC3	ERBB	TNFSF10	0.03	3	1	0	100	3	0.79	12.94	-58.57	urinary_tract	-0.22	-2.66
647V	FGFR	Gemcitabine	0.1	3	0.01	3.8	0	3	10	93.8	3.61	urinary_tract	5.55	4.55
HT1197	FGFR	Gemcitabine	0.1	3	0.01	1.47	22.36	3	1.24	36.9	-19.7	urinary_tract	5.92	4.55
HT1376	FGFR	Gemcitabine	0.1	3	0.01	1.58	20.53	1.05	1.72	68.58	17.26	urinary_tract	-7.74	-13.19
J82	FGFR	Gemcitabine	0.1	3	0.01	3.26	5.18	0.05	1.72	64.54	1.24	urinary_tract	11.76	14.49
KU1919	FGFR	Gemcitabine	0.1	3	0	3.74	8.01	1	0	100	5.79	urinary_tract	-0.05	-8.62
SW780	FGFR	Gemcitabine	0.1	3	0	2.88	20.49	3	10	48	-5.63	urinary_tract	-3.36	-4.65
T24	FGFR	Gemcitabine	0.1	3	0	10	52.14	1	0	100	1.52	urinary_tract	2.08	4.55
TCCSUP	FGFR	Gemcitabine	0.1	3	0	2.79	7.15	0.03	1.28	56.61	25.95	urinary_tract	11.84	10.57
UMUC3	FGFR	Gemcitabine	0.1	3	0.01	4.1	2.25	1	0	100	9.67	urinary_tract	5.35	4.28
VMCUB1	FGFR	Gemcitabine	0.1	3	0.01	3.37	8.29	0	0.1	84.56	-0.47	urinary_tract	3.34	5.97
647V	FGFR	HDAC_4	3	3	1.26	1.93	11.86	1	0	100	-10.13	urinary_tract	-5.7	-7.45
BFTC905	FGFR	HDAC_4	3	3	0.44	1.48	12.99	3	1.71	38.86	5.2	urinary_tract	-7.68	-6.13
BT474	FGFR	HDAC_4	1	1	1	0	100	1	0	100	-43	breast	-7.09	-11.09
CAL120	FGFR	HDAC_4	3	3	0.68	1.32	0	0.06	0.65	43.81	13.31	breast	1.41	-7.45
CAMA1	FGFR	HDAC_4	1	1	0.37	10	57	0.08	10	90.45	-27.94	breast	-7.24	-9.89
DMS114	FGFR	HDAC_4	3	3	1.04	1.53	0	0.16	1.77	11.35	-42.94	lung	-10.41	-12.55
HCC1500	FGFR	HDAC_4	1	1	0.73	1.94	0	0.05	1.13	53.46	63.11	breast	-2.61	-9.86
HT1197	FGFR	HDAC_4	3	3	0.73	0.72	0	3	1.02	21.69	-39.76	urinary_tract	-3.73	-7.45
HT1376	FGFR	HDAC_4	3	3	0.59	0.81	0	3	0.66	37.41	25.72	urinary_tract	-4.44	-10.67
J82	FGFR	HDAC_4	3	3	1.41	1.48	0	0.06	1.16	63.91	-6.77	urinary_tract	2.63	14.9
KATOIII	FGFR	HDAC_4	3	0.01	0.82	2.18	19.52	0	10	20.4	3.76	stomach	-2.07	-8.61
KMS11	FGFR	HDAC_4	3	0.03	1.07	3.16	0	0.02	1.93	0	-15.01	haematopoietic_and_lymphoid	-9.63	-12.67
MCF 7,00	FGFR	HDAC_4	1	1	1	1.3	25.72	1	10	93.4	3.38	breast	-0.12	-4.69
MDAMB361	FGFR	HDAC_4	1	1	0.34	10	33.3	1	10	82.6	-5.37	breast	-4.02	-6.98
NCIH1703	FGFR	HDAC_4	3	3	2.98	10	0	1.93	1.02	0	-4.63	lung	-0.39	4.7
NCIH520	FGFR	HDAC_4	3	3	1.06	10	44.4	0.1	1.22	61.68	-23.88	lung	1.93	-2.6
RT4	FGFR	HDAC_4	3	3	0.89	2.79	2.23	0.5	0.89	26.06	0.18	urinary_tract	29.84	54.38
SW780	FGFR	HDAC_4	3	3	0.65	1.69	10	0.64	0.45	0	-71.81	urinary_tract	2.9	-0.65
T24	FGFR	HDAC_4	3	3	1.2	10	14.79	1	0	100	-49.83	urinary_tract	-5.19	-7.45
T47D	FGFR	HDAC_4	1	1	1	0	100	1	0	100	-15.14	breast	-5.46	-5.75
TCCSUP	FGFR	HDAC_4	3	3	0.62	1.2	0	0.03	1.71	56.27	22.31	urinary_tract	10.48	11.72
UMUC3	FGFR	HDAC_4	3	3	1.1	10	25.7	1	0	100	-4.45	urinary_tract	-3.59	-7.45
VMCUB1	FGFR	HDAC_4	3	3	1.33	10	35.98	1	0	100	-0.95	urinary_tract	0.66	-5.74
647V	FGFR	HSP90	3	3	0.16	4.13	5.02	1	0	100	-5.42	urinary_tract	-4.4	6.12
BFTC905	FGFR	HSP90	3	3	0.11	2.28	0.45	3	1.33	53.92	3.6	urinary_tract	-7.46	7.43
BT474	FGFR	HSP90	1	1	0.05	2.57	6.02	1	0	100	-7.11	breast	-2.93	-8.46
CAL120	FGFR	HSP90	1	3	0.01	2.94	6.27	0.06	0.62	42.12	-10.7	breast	4.77	6.12
CAMA1	FGFR	HSP90	1	1	0.14	2.17	21.04	1	0	100	5.66	breast	-1.38	-1.59
DMS114	FGFR	HSP90	3	3	0.12	2.21	6.29	0.14	1.32	9.6	-15.24	lung	-6.72	-12.01
HCC1500	FGFR	HSP90	1	1	0.08	2.01	0	0.04	1.45	56.6	11.95	breast	4.08	1.54
HT1197	FGFR	HSP90	3	3	0.09	1.22	14.16	3	0.48	51.08	-17.26	urinary_tract	-2.14	6.12
HT1376	FGFR	HSP90	3	3	0.05	1.3	0	0.97	10	79.7	10.91	urinary_tract	-0.85	-1.16
J82	FGFR	HSP90	3	3	0.11	1.83	12.47	0.18	0.82	58.39	21.3	urinary_tract	7.22	19.29
KATOIII	FGFR	HSP90	3	0.01	0.08	3.35	5.89	0	10	19.89	1.18	stomach	0.88	-8.73
KMS11	FGFR	HSP90	0.3	0.03	0.04	1.09	0	0.02	1.44	0	-7.81	haematopoietic_and_lymphoid	-5.61	-2.65
MCF 7,00	FGFR	HSP90	1	1	0.03	2.79	9.91	1	0	100	2.5	breast	4.99	4.1
MDAMB361	FGFR	HSP90	1	1	0.11	1.73	0	0.3	10	84.4	2.97	breast	0.21	1.46
NCIH1703	FGFR	HSP90	3	3	0.13	2.33	8.37	1.78	1.21	0	9.18	lung	1.77	15.64
NCIH520	FGFR	HSP90	3	3	0.08	2.29	15.37	0.09	3.35	63.95	10.24	lung	4.3	3.25
RT4	FGFR	HSP90	3	3	0.25	10	0	0.48	0.86	25.59	26.02	urinary_tract	31.33	67.73
SW780	FGFR	HSP90	3	3	0.04	2.3	1.56	0.55	0.46	0	-27.37	urinary_tract	1.26	-0.92
T47D	FGFR	HSP90	1	1	0.08	10	26.9	1	0	100	-9.39	breast	-4.65	2.84
TCCSUP	FGFR	HSP90	0.3	3	0.14	2.07	0	0.04	1.11	54.04	16.96	urinary_tract	11.66	15.46
UMUC3	FGFR	HSP90	0.3	3	0.18	3.28	0	1	0	100	17.08	urinary_tract	1.23	6.98
VMCUB1	FGFR	HSP90	0.3	3	0.21	3.93	0	1	0	100	21.24	urinary_tract	-1.52	-1.9
647V	FGFR	IAP	3	3	0	2.01	14.53	1	0	100	-34.79	urinary_tract	4.73	10.77
BFTC905	FGFR	IAP	3	3	0	0.22	0	1.3	10	77.09	-21.94	urinary_tract	-6.38	11.03
CAL120	FGFR	IAP	3	3	0	0.1	6.81	0.04	0.63	41.71	23.46	breast	9.43	10.77
DMS114	FGFR	IAP	3	3	1.22	0.69	0	0.16	2.33	16.42	-8.75	lung	-4.86	-10.91
HT1197	FGFR	IAP	3	3	1.35	10	82.59	1.15	10	82.3	7	urinary_tract	3.36	10.77
HT1376	FGFR	IAP	0.03	3	0	0.5	29.02	1.05	10	74.1	16.01	urinary_tract	0.29	4.39
J82	FGFR	IAP	3	3	0	0.24	10.17	0.06	1.67	67.17	36.96	urinary_tract	8.24	12.4
KATOIII	FGFR	IAP	3	0.01	0	0.1	36.97	0	10	15.2	29.14	stomach	5.03	-7.22
MCF 7,00	FGFR	IAP	3	3	1.55	1.31	0	3	2.27	16.66	3.96	breast	6.99	4.61
NCIH1703	FGFR	IAP	3	3	0	1.14	10.97	1.8	1.25	0	-33.74	lung	-1.18	12.5
NCIH520	FGFR	IAP	3	3	0	0.1	92.16	0.13	0.78	54.74	5.43	lung	3.49	6.87
RT4	FGFR	IAP	3	3	0.12	0.76	68.65	0.53	0.83	19.64	-22.51	urinary_tract	35.71	67.74
SW780	FGFR	IAP	3	3	0.01	1.45	19.83	0.55	0.45	0	6.69	urinary_tract	-10.36	-9.53
T24	FGFR	IAP	1	3	1	0.41	68.68	1	0	100	-35.41	urinary_tract	2.42	10.77
TCCSUP	FGFR	IAP	0.03	3	0	0.47	60.5	0.03	1.89	59.56	92.21	urinary_tract	12.66	17.27
UMUC3	FGFR	IAP	0.03	3	0	1.02	63.5	1	0	100	-30.96	urinary_tract	-0.4	3.38
VMCUB1	FGFR	IAP	0.03	3	0.01	0.68	58.83	1	0	100	-9.45	urinary_tract	-2.39	3.02
647V	FGFR	MTOR_1	1	3	0.58	1.43	23.19	1	0	100	8.47	urinary_tract	7.72	5.9
BT20	FGFR	MTOR_1	1	1	0.49	1.3	3.01	1	1.14	85.42	6.25	breast	10.92	5.13
BT549	FGFR	MTOR_1	1	1	0.28	1.21	10.27	0.06	0.84	62.43	12.57	breast	3.09	5.9
CAL120	FGFR	MTOR_1	0.3	3	0.12	1.49	50.71	0.31	0.34	16.67	20.69	breast	10.81	5.9
CAMA1	FGFR	MTOR_1	1	1	0.3	3.34	22.54	1	10	94.8	-2.88	breast	8.88	11.02
DU4475	FGFR	MTOR_1	1	1	0.18	2.04	6.8	1	0	100	10.22	breast	9.32	4.76
HCC1806	FGFR	MTOR_1	1	1	0.24	2.1	13.83	1	0	100	17.8	breast	7.39	5.06
HCC38	FGFR	MTOR_1	1	1	0.32	10	67.1	0.14	10	78.39	23.34	breast	5.22	2.68
KATOIII	FGFR	MTOR_1	1	0.01	0.26	1.55	21.57	0	3.58	14.33	-0.12	stomach	3.62	-9.72
MDAMB436	FGFR	MTOR_1	1	1	0.14	0.9	10.83	0.1	0.74	86.28	1.27	breast	0.71	2.02
MDAMB468	FGFR	MTOR_1	1	1	1	10	67.2	1	0	100	3.2	breast	3.71	6.61
NCIH1703	FGFR	MTOR_1	1	3	0.17	0.95	7.89	2.06	1.26	0	32.7	lung	7.03	23.77
647V	FGFR	PARP1	3	3	1.95	1.43	72.31	1	0	100	-5.96	urinary_tract	-3.42	2.42
BFTC905	FGFR	PARP1	3	3	3	0.66	31.53	1.23	9.45	56.39	-19.64	urinary_tract	-4.93	3.31
BT20	FGFR	PARP1	3	1	3	2.03	60.28	0.38	10	85.6	16.17	breast	7.13	-0.6
BT549	FGFR	PARP1	3	1	3	0.51	28.02	0.09	0.69	50.59	3.43	breast	-6.78	2.42
CAL148	FGFR	PARP1	3	1	0.65	2.45	75.97	1	0	100	-16.82	breast	-1.75	-14.75
CAL51	FGFR	PARP1	3	1	2.43	1.41	0	1	10	91	24.32	breast	1.54	-1.08
CAMA1	FGFR	PARP1	3	1	3	0.77	17.95	0.19	10	93.16	-10.67	breast	-1.18	-4.71
DMS114	FGFR	PARP1	3	3	3	0.51	24.82	0.16	2.39	16.79	-3.74	lung	-8.75	-14.55
HCC1143	FGFR	PARP1	3	1	3	2.07	44.48	1	0	100	10.63	breast	4.02	1.92
HCC1187	FGFR	PARP1	3	1	3	0.84	7.65	0.03	10	90.47	-0.6	breast	-2.4	-4.9
HCC1395	FGFR	PARP1	3	1	0.17	0.4	0	0.01	1.84	48.2	30.17	breast	11.43	8.74
HCC1428	FGFR	PARP1	3	1	0.97	10	51.7	1	0	100	-13.25	breast	-6.25	-9.06
HCC1806	FGFR	PARP1	3	1	1.83	0.72	0	0.01	10	92.32	17.35	breast	0.51	-5.27
HCC1937	FGFR	PARP1	3	1	3	0.75	52.55	1	0	100	1.14	breast	8.62	11.98
HCC38	FGFR	PARP1	3	1	3	0.32	60.98	0.06	1.25	66.14	7.79	breast	-2.37	8.26
HCC70	FGFR	PARP1	3	1	3	3.9	84.2	1	0	100	-11.89	breast	-7.31	-23.83
HT1197	FGFR	PARP1	3	3	3	0.22	16.84	0.09	1.08	56.87	-2.49	urinary_tract	-2.03	2.42
J82	FGFR	PARP1	3	3	1.33	4.44	71.97	0.07	1.48	67.41	7.23	urinary_tract	7.63	14.58
KATOIII	FGFR	PARP1	3	0.01	3	0.62	36.71	0	2.23	0	-7.13	stomach	-0.61	-10.89
MCF 7,00	FGFR	PARP1	3	3	0.21	0.67	9.77	1.23	10	42.59	-8.83	breast	3.1	2.31
MDAMB157	FGFR	PARP1	3	1	0.94	0.79	0	0.03	1.59	33.87	26.54	breast	16.75	2.42
MDAMB436	FGFR	PARP1	3	1	0.05	0.37	7.27	0.3	10	93.9	-8.74	breast	-6.08	-5.86
MDAMB453	FGFR	PARP1	3	1	1.55	1.05	0	0.16	3.21	23.81	-2.14	breast	-3.95	-5.5
MDAMB468	FGFR	PARP1	3	1	1.12	1.14	0	1	0.36	73.52	17.35	breast	-5.3	3.04
NCIH1703	FGFR	PARP1	3	3	3	0.55	51.08	1.85	1.11	0	14.98	lung	1.88	11.1
NCIH520	FGFR	PARP1	3	3	2.37	0.51	0	0.08	1.74	62.29	4.93	lung	5.89	1.37
RT4	FGFR	PARP1	3	3	3	0.35	81.2	0.6	0.76	15.34	44.06	urinary_tract	31.98	61.89
SW780	FGFR	PARP1	3	3	3	0.47	38.66	0.58	0.48	0	15.09	urinary_tract	1.63	-3.91
T24	FGFR	PARP1	3	3	3	10	32	1	0	100	-20.61	urinary_tract	-2.2	2.42
TCCSUP	FGFR	PARP1	3	3	3	0.67	35.11	0.04	0.67	49.8	15.29	urinary_tract	14.73	12.63
UMUC3	FGFR	PARP1	3	3	3	0.88	61.02	1	0	100	-2.5	urinary_tract	-1.55	2.57
647V	FGFR	PIK3C	3	3	1.12	1.6	42.87	1	0	100	-5.38	urinary_tract	4.02	-1.04
BFTC905	FGFR	PIK3C	3	3	1.38	0.67	0	3	2.63	49.01	-7.29	urinary_tract	6.12	-1.04
BT20	FGFR	PIK3C	1	1	0.47	1.17	28.29	1	0	100	23.09	breast	12.17	-1.04
BT549	FGFR	PIK3C	1	1	0.47	0.97	0	0.07	1.25	63.2	19.61	breast	-2.16	-1.04
CAL120	FGFR	PIK3C	1	1	0.3	10	66.7	0.11	10	80.8	35.37	breast	1.09	-1.04
CAL148	FGFR	PIK3C	1	1	0.67	1.53	25.79	1	0	100	22.73	breast	-4.4	-9.07
CAL51	FGFR	PIK3C	1	1	0.89	0.9	0	1	1.1	50.02	16.56	breast	2.59	0.67
CAMA1	FGFR	PIK3C	1	1	0.61	2.96	48.05	1	0	100	14.77	breast	-0.31	-1.04
DU4475	FGFR	PIK3C	1	1	0.12	2.01	0	0.03	10	90.07	-3.44	breast	5.4	5.67
HCC1143	FGFR	PIK3C	1	1	1	0.79	7.22	1	0	100	11.15	breast	3.29	2.53
HCC1187	FGFR	PIK3C	1	1	0.25	3.2	28.35	1	0	100	25.88	breast	-1.34	-1.42
HCC1395	FGFR	PIK3C	1	1	0.31	10	52.9	0.01	2.26	55.05	65.02	breast	12.34	3.82
HCC1428	FGFR	PIK3C	1	1	1	0.29	71.07	0	0.1	89.02	-10.37	breast	-7.03	-7.36
HCC1806	FGFR	PIK3C	1	1	0.31	10	24.4	1	0	100	-1.49	breast	9.66	9.1
HCC1937	FGFR	PIK3C	1	1	0.45	1.05	60.39	1	0	100	8.47	breast	6.77	5.79
HCC38	FGFR	PIK3C	1	1	0.31	10	66.6	0.11	2.27	73.09	7.42	breast	-1.1	-6.11
HT1376	FGFR	PIK3C	3	3	0.85	0.88	17.57	3	2.15	37.96	2.65	urinary_tract	3.97	-0.47
J82	FGFR	PIK3C	3	3	0.64	0.83	28.89	0.1	1.19	66.74	56.04	urinary_tract	6.13	17.68
MDAMB157	FGFR	PIK3C	1	1	0.22	1.16	63.73	0.04	2.59	33.11	49.48	breast	13.25	-1.04
MDAMB436	FGFR	PIK3C	1	1	0.29	1.49	43.96	0.16	10	88.99	7.23	breast	-2.5	-3.27
MDAMB453	FGFR	PIK3C	1	1	0.24	2.53	11.35	0.23	10	29.79	20.46	breast	-1.99	0.63
MDAMB468	FGFR	PIK3C	1	1	1	10	82	1	0	100	-2.51	breast	10.98	-2.17
SW780	FGFR	PIK3C	3	3	3	10	75.4	3	10	67	25.98	urinary_tract	-1.11	-9.47
T24	FGFR	PIK3C	3	3	1	10	60.3	0	0.1	94.05	-24.64	urinary_tract	-3.24	-1.04
TCCSUP	FGFR	PIK3C	1	3	0.51	1.42	37.28	0.03	1.73	58.49	34.16	urinary_tract	12.7	9.6
UMUC3	FGFR	PIK3C	3	3	1.2	1.89	34.22	1	0	100	5.18	urinary_tract	-1.49	-2.83
647V	FGFR	PIM1	3	3	1.54	0.4	84.73	0.97	2.79	94.06	-2.08	urinary_tract	15.38	3.63
BFTC905	FGFR	PIM1	3	3	3	10	94.4	3	2.75	59.61	-9.02	urinary_tract	14.6	5.07
BT20	FGFR	PIM1	1	1	0.17	10	83.57	0.37	10	80.9	9.2	breast	15.87	2.29
BT549	FGFR	PIM1	1	1	0.2	0.82	69.99	0.14	3.09	60.4	11.52	breast	6.18	3.63
CAL148	FGFR	PIM1	1	1	0.49	1.51	91.56	1	0	100	-10.09	breast	9.01	-12.26
CAL51	FGFR	PIM1	1	1	1	0	100	0.12	10	93.85	13.42	breast	6.96	0.87
CAMA1	FGFR	PIM1	1	1	1	0.97	73.63	1	10	94.8	-12.19	breast	4.79	-2.41
DMS114	FGFR	PIM1	3	3	3	1.29	6.15	0.15	1.92	14.54	-16.73	lung	4.8	-15.57
HCC1143	FGFR	PIM1	1	1	0	0.1	78.81	0	0.1	78.5	-13.32	breast	7.56	3.29
HCC1187	FGFR	PIM1	1	1	0.16	0.81	58.7	1	1.79	86.4	11.1	breast	15.96	-4.04
HCC1395	FGFR	PIM1	1	1	1	10	79.2	0.01	2.09	53.7	20.19	breast	19.63	9.96
HCC1428	FGFR	PIM1	1	1	0.4	2.48	70.97	1	0	100	-40.09	breast	3.08	-9.66
HCC1806	FGFR	PIM1	1	1	0.34	2.22	91.53	1	0	100	-17.31	breast	9.3	-6.46
HCC1937	FGFR	PIM1	1	1	1	0	100	1	0	100	23.09	breast	14.83	8.85
HCC38	FGFR	PIM1	1	1	1	0	100	0.1	10	80	39.88	breast	10.79	10.58
HCC70	FGFR	PIM1	1	1	1	0.33	68.83	1	0.28	80.86	-28.52	breast	5.45	-27.02
HT1197	FGFR	PIM1	3	3	0	8.55	75.76	3	3.94	42.2	-26.91	urinary_tract	17.01	3.63
J82	FGFR	PIM1	3	3	0.27	10	83.25	0.05	1.81	68.95	29.15	urinary_tract	14.67	18.6
KATOIII	FGFR	PIM1	3	0.01	0.91	10	94.6	0	2.54	5.83	-4.74	stomach	12.96	-10.09
KMS11	FGFR	PIM1	3	0.03	1.12	10	75	0.01	10	40.6	-16.3	haematopoietic_and_lymphoid	11.75	-4.89
MCF 7,00	FGFR	PIM1	3	3	0.57	3.18	69.22	2.74	1.19	0	8.45	breast	15.18	0.91
MDAMB157	FGFR	PIM1	1	1	1	0	100	0.04	2.77	41.46	23.13	breast	20.31	3.63
MDAMB436	FGFR	PIM1	1	1	0.21	10	91.3	1	0	100	2.79	breast	6.32	-6.31
MDAMB453	FGFR	PIM1	1	1	1	10	94.2	0.25	10	30.1	28.26	breast	7.97	-1.58
MDAMB468	FGFR	PIM1	1	1	1	0.17	87.61	1	0.58	81.72	-7.05	breast	10.65	5.02
NCIH1703	FGFR	PIM1	3	3	0.32	0.72	65.59	1.88	1.22	4.25	30.1	lung	7.57	13.7
NCIH520	FGFR	PIM1	3	3	1	0	100	0.06	1.46	65.05	6.38	lung	16.9	5.96
RT4	FGFR	PIM1	3	3	1	0	100	0.47	0.75	19.02	0.08	urinary_tract	45.01	53.82
SW780	FGFR	PIM1	3	3	0.13	0.57	84.2	0.6	0.53	0	16.23	urinary_tract	13.19	-6.37
T24	FGFR	PIM1	3	3	1	0	100	1	0	100	-8.85	urinary_tract	5.97	3.63
TCCSUP	FGFR	PIM1	3	3	0.03	10	88.95	0.03	1.55	57.84	33.71	urinary_tract	21.02	19.2
UMUC3	FGFR	PIM1	3	3	1	0	100	1	0	100	-10.76	urinary_tract	6.38	2.77
VMCUB1	FGFR	PIM1	3	3	1	0	100	1	0	100	3.55	urinary_tract	8.51	4.19
647V	FGFR	SRC	3	3	3	10	76.8	1	0	100	-1.09	urinary_tract	2	3.68
BFTC905	FGFR	SRC	1	3	1	3.66	52.6	3	0.47	42.48	-30.34	urinary_tract	-5.87	6.17
HT1197	FGFR	SRC	3	3	1	0	100	0.39	1.14	53.28	-47	urinary_tract	2.54	3.68
HT1376	FGFR	SRC	3	3	0.65	2.71	55.08	3	1.67	41.57	-6.04	urinary_tract	6.43	-2.21
J82	FGFR	SRC	3	3	0.2	5.27	81.05	0.09	1.11	62.66	36.15	urinary_tract	9.52	20.24
T24	FGFR	SRC	3	3	0.98	10	28.4	1	0	100	-1.43	urinary_tract	2.88	3.68
TCCSUP	FGFR	SRC	3	3	3	0.6	27.15	0.03	3.02	55.97	38.31	urinary_tract	18.5	21.41
UMUC3	FGFR	SRC	3	3	1.7	1.63	39.84	1	0	100	21.32	urinary_tract	5.99	0.46
VMCUB1	FGFR	SRC	1	3	1	10	8.2	1	0	100	5.6	urinary_tract	4.93	1.69
647V	FGFR	TNF	0.1	3	0.1	10	94.2	1	0	100	-7.49	urinary_tract	-2.38	4.86
BFTC905	FGFR	TNF	0.1	3	0.01	2.54	38.48	1.01	10	59.3	6.03	urinary_tract	-4.8	2.6
HT1197	FGFR	TNF	0.1	3	0	1.26	56.09	1.14	10	69.8	13.48	urinary_tract	-2.64	4.86
J82	FGFR	TNF	0.1	3	0.1	1.88	65.46	0.09	0.89	60.33	4.04	urinary_tract	6.12	23.77
SW780	FGFR	TNF	0.03	3	0.03	0.14	2.29	3	10	79.2	-128.44	urinary_tract	-0.03	0.93
T24	FGFR	TNF	0.03	3	1	0	100	1	0	100	-34.72	urinary_tract	-1.49	4.86
TCCSUP	FGFR	TNF	0.03	3	0	0.1	88.59	0.04	2.73	60.67	45.02	urinary_tract	14.66	24.9
UMUC3	FGFR	TNF	0.03	3	0.03	0.24	32.2	1	0	100	-41.62	urinary_tract	0.9	5.82
647V	FGFR	TNFSF10	0.03	3	0.03	10	81.6	3	10	91.2	-2.35	urinary_tract	-7.64	3.59
BFTC905	FGFR	TNFSF10	0.03	3	0.03	0.96	23.07	3	2.4	46.03	-1.31	urinary_tract	-12.87	2.86
HT1197	FGFR	TNFSF10	0.03	3	0.03	0.11	68.06	0.04	0.47	76.73	-14.88	urinary_tract	-5.44	3.59
J82	FGFR	TNFSF10	0.03	3	1	0	100	0.58	0.4	45.34	-5.88	urinary_tract	4.38	16.77
KU1919	FGFR	TNFSF10	0.03	3	0	0.1	93.83	1	0	100	-40.35	urinary_tract	-11.99	-8.96
SW780	FGFR	TNFSF10	0.03	3	0	4.24	0.44	3	10	76.6	-0.63	urinary_tract	-2.11	-5.12
T24	FGFR	TNFSF10	0.03	3	0.01	10	54.8	1	0	100	-19.83	urinary_tract	-5.22	3.59
TCCSUP	FGFR	TNFSF10	0.03	3	0.01	1.5	35.79	0.03	1.21	56.31	39.85	urinary_tract	12.15	13.96
UMUC3	FGFR	TNFSF10	0.03	3	1	0	100	1	0	100	-2.16	urinary_tract	-1.83	3.36
647V	Gemcitabine	HDAC_4	3	0.1	1.04	1.32	0	0	3.23	0	-2.03	urinary_tract	4.19	-9.22
BFTC905	Gemcitabine	HDAC_4	3	0.1	0.3	1.37	9.59	0	3.56	1.59	0.73	urinary_tract	-2.05	-8.51
HT1197	Gemcitabine	HDAC_4	3	0.1	1.07	2.1	17.58	0.01	2.69	26.36	-13.88	urinary_tract	3.43	-9.22
HT1376	Gemcitabine	HDAC_4	3	0.1	1.22	0.77	0	0.01	1.75	21.12	6.15	urinary_tract	-9.36	-22.71
J82	Gemcitabine	HDAC_4	3	0.1	1.29	1.74	6.6	0	3.34	5.11	-20.87	urinary_tract	7.42	3.82
KU1919	Gemcitabine	HDAC_4	3	0.1	0.93	10	6.2	0	3.89	8.67	1.29	urinary_tract	1.88	-9.33
SW780	Gemcitabine	HDAC_4	3	0.1	0.67	0.51	0	0	2.1	18.95	12.03	urinary_tract	-0.34	5.03
T24	Gemcitabine	HDAC_4	3	0.1	1.03	10	5.6	0	10	47.3	8.98	urinary_tract	-2.73	-9.22
TCCSUP	Gemcitabine	HDAC_4	3	0.1	0.57	1.25	0	0	2.05	5.62	0.69	urinary_tract	2.49	5.03
UMUC3	Gemcitabine	HDAC_4	3	0.1	1.13	10	24.9	0.01	3.12	1.39	-13.36	urinary_tract	4.22	-9.13
VMCUB1	Gemcitabine	HDAC_4	3	0.1	2.99	10	0	0.01	3.23	8.47	-2.5	urinary_tract	4.61	-8.18
647V	Gemcitabine	HSP90	3	0.1	0.13	4.11	1.97	0.01	3.49	0	-15.69	urinary_tract	11.26	10.75
BFTC905	Gemcitabine	HSP90	3	0.1	0.06	1.91	0.88	0	3.91	1.45	-5.79	urinary_tract	5.47	10.05
HT1197	Gemcitabine	HSP90	3	0.1	0.13	2.48	25.55	0.01	2.15	21.67	-10.78	urinary_tract	9.71	10.75
HT1376	Gemcitabine	HSP90	3	0.1	0.07	1.3	15.6	0.01	3.28	23.5	-3.22	urinary_tract	-1.15	3.09
J82	Gemcitabine	HSP90	3	0.1	0.09	1.97	14.29	0.01	3.83	5.5	-6.99	urinary_tract	3.68	9.33
KU1919	Gemcitabine	HSP90	3	0.1	0.12	2.96	2.91	0	3.32	8.38	-8.34	urinary_tract	6.33	10.65
SW780	Gemcitabine	HSP90	0.3	0.1	0.22	2.8	0	0	1.77	18.58	-7.13	urinary_tract	0.74	6
TCCSUP	Gemcitabine	HSP90	0.3	0.1	0.14	2.26	0	0	2.71	6.43	-4.03	urinary_tract	8.25	9.86
UMUC3	Gemcitabine	HSP90	0.3	0.1	0.12	10	12.49	0.01	10	2.7	-27.43	urinary_tract	8.1	12.44
VMCUB1	Gemcitabine	HSP90	0.3	0.1	0.15	2.42	0	0.01	3.62	8.63	-14.98	urinary_tract	9.44	-4.07
647V	Gemcitabine	IAP	3	0.1	0	1.75	13.56	0.01	3.15	0	19.33	urinary_tract	15.11	21.1
A549	Gemcitabine	IAP	3	0.03	3	0.12	76.06	0.01	9.56	0	5.98	lung	13.32	6.08
BFTC905	Gemcitabine	IAP	3	0.1	0	0.23	0	0	4.25	1.52	12.53	urinary_tract	9.66	17.18
DMS114	Gemcitabine	IAP	3	0.03	1.52	1.38	63.54	1	0	100	0.5	lung	8.37	12.08
HT1197	Gemcitabine	IAP	3	0.1	3	10	9.8	0.01	3.98	27.24	31.05	urinary_tract	16.79	21.1
HT1376	Gemcitabine	IAP	3	0.1	0.22	0.31	0	0	2.99	23.85	24.76	urinary_tract	2.9	17.67
J82	Gemcitabine	IAP	3	0.1	0.01	1.04	29.1	0.01	4.28	5.05	13.7	urinary_tract	9.36	7.05
KU1919	Gemcitabine	IAP	3	0.1	3	10	90.6	0	10	8	22.81	urinary_tract	11.29	21.1
NCIH1299	Gemcitabine	IAP	1	0.01	0.06	1.03	28.24	0	3.63	8.02	19.12	lung	21.42	21.1
NCIH1437	Gemcitabine	IAP	1	0.01	1	0.13	44.88	0	1.42	5.73	50.7	lung	10.54	20.48
NCIH1563	Gemcitabine	IAP	1	0.03	0.01	1.55	18.04	0	10	45.6	29.99	lung	7.68	-4.04
NCIH1703	Gemcitabine	IAP	0.01	0.01	0	1.78	16.5	0	2.71	10.17	7.07	lung	7.17	12.74
NCIH1793	Gemcitabine	IAP	3	0.03	3	0.47	37.75	0.01	2.61	1.15	43.75	lung	29.87	20.75
NCIH1975	Gemcitabine	IAP	3	0.1	0.05	0.44	69.1	0	2.34	19.4	60.64	lung	8.54	4.32
NCIH2085	Gemcitabine	IAP	3	1	0.04	0.61	41.52	0.09	1.27	27.5	71.96	lung	19.44	21.1
NCIH2170	Gemcitabine	IAP	3	0.01	3	0.15	56.5	0	1.58	0.65	21.59	lung	-1.25	17.1
NCIH226	Gemcitabine	IAP	3	0.1	0	0.1	15.53	0.01	1.86	9.23	48.1	lung	16	21.1
NCIH2291	Gemcitabine	IAP	3	0.03	1.56	10	74.26	0	1.3	21.34	28.56	lung	13.04	4.23
NCIH23	Gemcitabine	IAP	1	0.01	0	0.33	42.31	0	1.36	3.92	34.37	lung	7.57	14.03
NCIH3122	Gemcitabine	IAP	0.3	0.03	0.3	0.2	41.94	0	2.31	0	12.83	lung	9.99	21.1
NCIH358	Gemcitabine	IAP	3	0.01	0	0.34	71.89	0	0.94	0	35.7	lung	15.06	15.61
NCIH520	Gemcitabine	IAP	3	0.1	1	0	100	0.01	3.77	19.63	-1.9	lung	5.09	6.24
NCIH522	Gemcitabine	IAP	0.3	0.03	0	0.21	0	0	2.57	7.14	24.06	lung	20.7	21.78
NCIH838	Gemcitabine	IAP	1	0.1	0.01	0.85	22.98	0.01	4	3.96	19.85	lung	17.86	17.52
SW780	Gemcitabine	IAP	0.03	0.1	0	1.22	57.94	0	2.26	20.22	33.55	urinary_tract	-15.41	-6.24
SW900	Gemcitabine	IAP	3	0.01	0.32	0.17	0	0	1.44	0.8	48.7	lung	19.32	12.34
T24	Gemcitabine	IAP	1	0.1	0.11	10	86.65	0	10	53.26	22.09	urinary_tract	15.86	21.1
TCCSUP	Gemcitabine	IAP	0.03	0.1	0	0.52	66.66	0	2.67	8.15	44.35	urinary_tract	12.26	12.22
UMUC3	Gemcitabine	IAP	0.03	0.1	0.01	0.64	61.27	0.01	3.06	1.67	27.04	urinary_tract	10.98	9.67
VMCUB1	Gemcitabine	IAP	0.03	0.1	0	2.77	83.27	0.01	3.8	8.04	42.82	urinary_tract	12.23	4.47
647V	Gemcitabine	MAP2K_1	1	0.1	0.33	0.75	56.28	0.01	3.91	0	13.05	urinary_tract	14.38	9.7
HT1197	Gemcitabine	MAP2K_1	1	0.1	0.01	0.69	68.16	0	1.07	17.63	11.06	urinary_tract	16.83	9.7
HT1376	Gemcitabine	MAP2K_1	3	0.1	0.18	0.99	58.22	0	3.39	25.8	-3.74	urinary_tract	2.6	-4.16
J82	Gemcitabine	MAP2K_1	3	0.1	3	0.18	23.42	0	3.05	4.88	4.38	urinary_tract	8.68	5.47
KU1919	Gemcitabine	MAP2K_1	3	0.1	0.37	1.23	9.34	0	4.16	9.03	6.47	urinary_tract	11.67	9.7
SW780	Gemcitabine	MAP2K_1	3	0.1	1.13	2.78	43.7	0	2.32	20.73	12.21	urinary_tract	8.98	8.14
T24	Gemcitabine	MAP2K_1	3	0.1	0.19	1.01	18.47	0	10	47.03	40.05	urinary_tract	12.15	9.7
TCCSUP	Gemcitabine	MAP2K_1	3	0.1	3	0.24	26.2	0	3.22	7.37	0.72	urinary_tract	14.69	0.1
UMUC3	Gemcitabine	MAP2K_1	3	0.1	0.21	3.09	55.15	0.01	3.45	1.47	1.8	urinary_tract	13.89	7.18
VMCUB1	Gemcitabine	MAP2K_1	3	0.1	0.33	0.8	67.6	0	0.92	0	-12.44	urinary_tract	13.31	9.88
647V	Gemcitabine	MTOR_1	1	0.1	0.52	0.89	0	0	3.05	0	5.56	urinary_tract	12.27	3.31
BFTC905	Gemcitabine	MTOR_1	3	0.1	0.31	1.41	20.32	0	4.43	1.83	8.05	urinary_tract	9.47	0.65
HT1197	Gemcitabine	MTOR_1	3	0.1	1.48	0.48	0	0	0.81	12.28	2.82	urinary_tract	10.95	3.31
HT1376	Gemcitabine	MTOR_1	3	0.1	0.5	0.8	19.69	0	1.92	21.79	2.42	urinary_tract	-2.69	-5.45
J82	Gemcitabine	MTOR_1	3	0.1	0.78	0.88	5.87	0	3.33	4.56	6.2	urinary_tract	6.67	4.27
KU1919	Gemcitabine	MTOR_1	1	0.1	0.32	10	36.9	0	10	7.43	9.17	urinary_tract	6.18	4.77
SW780	Gemcitabine	MTOR_1	3	0.1	0.45	1.7	27.88	0	2.7	20.47	12.59	urinary_tract	-0.89	-4.34
T24	Gemcitabine	MTOR_1	3	0.1	0.65	1.88	11.67	0	10	51.06	21.84	urinary_tract	9.32	3.31
TCCSUP	Gemcitabine	MTOR_1	1	0.1	1	0.79	0.13	0	2.49	7.38	5.37	urinary_tract	11.88	5.07
UMUC3	Gemcitabine	MTOR_1	1	0.1	1	10	43.4	0.01	2.69	1.68	13.59	urinary_tract	8.29	2.73
VMCUB1	Gemcitabine	MTOR_1	1	0.1	0.37	10	62.1	0.01	2.98	5.29	-8.81	urinary_tract	10.7	3.54
SW780	Gemcitabine	PARP1	3	0.1	1	0	100	0	2.09	20.34	0.65	urinary_tract	-0.28	4.22
T24	Gemcitabine	PARP1	3	0.1	2.4	2.01	0	0	10	48.85	7.96	urinary_tract	16.92	5.82
VMCUB1	Gemcitabine	PARP1	3	0.1	3	1.36	65.15	0.01	3.23	5.51	3.42	urinary_tract	10	2.88
647V	Gemcitabine	PIK3C	3	0.1	1.82	0.84	0	0	3.26	0	-2.07	urinary_tract	8.27	1.49
BFTC905	Gemcitabine	PIK3C	3	0.1	0.94	0.66	0	0	4.53	1.57	-2.93	urinary_tract	7.61	1.49
HT1197	Gemcitabine	PIK3C	3	0.1	3	0.83	16.97	0	1.82	22.44	-9.39	urinary_tract	8.58	1.49
HT1376	Gemcitabine	PIK3C	3	0.1	0.91	2.04	35.52	0.01	2.47	24.96	-4.73	urinary_tract	-1.47	-1.68
J82	Gemcitabine	PIK3C	3	0.1	0.79	1.29	26.99	0	3.13	5.27	-11.72	urinary_tract	5.48	12.02
KU1919	Gemcitabine	PIK3C	3	0.1	3	10	75.2	0	3.2	7.5	-3.25	urinary_tract	5.73	0.65
SW780	Gemcitabine	PIK3C	3	0.1	3	10	52.6	0	2.38	19.54	-27.83	urinary_tract	-14.29	-14.95
T24	Gemcitabine	PIK3C	3	0.1	1.24	2.19	34.9	0	8.16	48.4	-3.6	urinary_tract	3.35	1.49
TCCSUP	Gemcitabine	PIK3C	1	0.1	0.31	1.98	46.37	0	3.62	7.85	-3.16	urinary_tract	4.23	3.52
UMUC3	Gemcitabine	PIK3C	3	0.1	1.38	1.49	22.01	0.01	3.44	1.97	-0.19	urinary_tract	5.33	-2.07
VMCUB1	Gemcitabine	PIK3C	3	0.1	1.44	10	59.67	0.01	3.62	5.7	-19.7	urinary_tract	7.31	10.93
647V	Gemcitabine	PIK3CB_PIK3CD	3	0.1	0.39	0.86	0	0	3.63	0	8.67	urinary_tract	7.28	1.75
BFTC905	Gemcitabine	PIK3CB_PIK3CD	3	0.1	0.17	1	24.21	0	3.53	1.37	15.66	urinary_tract	6.82	2.38
HT1197	Gemcitabine	PIK3CB_PIK3CD	3	0.1	3	0.19	64.33	0.01	1.45	22.83	14	urinary_tract	8.97	1.75
HT1376	Gemcitabine	PIK3CB_PIK3CD	3	0.1	1.6	0.46	0	0.01	2.78	25.62	24.34	urinary_tract	-2.83	6.51
J82	Gemcitabine	PIK3CB_PIK3CD	3	0.1	0.42	1.15	44.56	0.01	5.26	5.44	4.1	urinary_tract	4.64	6.4
KU1919	Gemcitabine	PIK3CB_PIK3CD	3	0.1	1	0	100	0	2.96	7.3	1.51	urinary_tract	5.66	1.68
SW780	Gemcitabine	PIK3CB_PIK3CD	3	0.1	1	0	100	0	1.97	18.51	6.74	urinary_tract	-13.13	-0.46
T24	Gemcitabine	PIK3CB_PIK3CD	3	0.1	0.95	10	79.5	0	10	48.87	-2	urinary_tract	3.85	1.75
TCCSUP	Gemcitabine	PIK3CB_PIK3CD	3	0.1	0.94	0.71	42.22	0	3.08	7.87	33.8	urinary_tract	4.73	6.77
UMUC3	Gemcitabine	PIK3CB_PIK3CD	3	0.1	2.95	1.46	42.78	0.01	2.97	1.25	13.34	urinary_tract	5.63	-3.05
VMCUB1	Gemcitabine	PIK3CB_PIK3CD	3	0.1	1.39	10	91.6	0.01	3.99	6.02	18.61	urinary_tract	6.2	-0.21
647V	Gemcitabine	PIM1	3	0.1	0.12	1.76	90.78	0	3.38	0	14.33	urinary_tract	15.96	10.27
BFTC905	Gemcitabine	PIM1	3	0.1	0.33	0.59	84.29	0	4.36	1.7	8.91	urinary_tract	13.52	10.27
HT1197	Gemcitabine	PIM1	3	0.1	0.03	10	77.85	0.01	2.06	20.84	21.56	urinary_tract	17.88	10.27
HT1376	Gemcitabine	PIM1	3	0.1	0	0.23	88.25	0	3.19	25.65	-0.39	urinary_tract	3.61	10.27
J82	Gemcitabine	PIM1	3	0.1	3	0.27	70.79	0	2.23	3.87	11.55	urinary_tract	8.41	-3.26
KU1919	Gemcitabine	PIM1	3	0.1	1	0	100	0	3.77	8.84	10.3	urinary_tract	11.93	10.27
SW780	Gemcitabine	PIM1	3	0.1	1	0	100	0	2.41	20.44	11.46	urinary_tract	6.02	-6.85
T24	Gemcitabine	PIM1	3	0.1	1	0	100	0	10	48.85	-5.04	urinary_tract	12.5	10.27
TCCSUP	Gemcitabine	PIM1	3	0.1	0.51	0.5	78.27	0	2.71	7.1	5.19	urinary_tract	13.99	10.14
UMUC3	Gemcitabine	PIM1	3	0.1	1	0	100	0.01	2.85	1.91	5.07	urinary_tract	12.56	10.27
VMCUB1	Gemcitabine	PIM1	3	0.1	1	0	100	0	3.25	7	-3.17	urinary_tract	11.91	10.27
647V	Gemcitabine	SRC	3	0.1	3	0.61	62.22	0	2.98	0	2.71	urinary_tract	7.02	2.02
BFTC905	Gemcitabine	SRC	1	0.1	0.97	1.22	0	0	3.95	1.53	-6.74	urinary_tract	6.31	2.02
HT1197	Gemcitabine	SRC	3	0.1	1	0	100	0.01	1.9	24.28	-5.6	urinary_tract	8.22	2.02
J82	Gemcitabine	SRC	3	0.1	3	0.57	47.17	0	3.4	5.31	2.88	urinary_tract	6.71	5.24
KU1919	Gemcitabine	SRC	3	0.1	3	10	93	0	10	8.57	12.18	urinary_tract	7.61	1.93
T24	Gemcitabine	SRC	3	0.1	0.65	1.76	18.59	0	10	48.19	27.75	urinary_tract	4.67	2.02
TCCSUP	Gemcitabine	SRC	3	0.1	0.7	1.2	61.75	0	2.53	7.19	13.08	urinary_tract	10.51	5.9
UMUC3	Gemcitabine	SRC	3	0.1	3	1.65	19.39	0.01	3.48	1.6	-1.5	urinary_tract	7.81	1.29
VMCUB1	Gemcitabine	SRC	1	0.1	1	0	100	0.01	5.79	6.19	-1.16	urinary_tract	5.85	0.79
647V	HDAC_4	HSP90	3	3	0.19	3.61	5.33	1.59	2.12	11.7	2.88	urinary_tract	0.15	-6.28
BFTC905	HDAC_4	HSP90	3	3	0.12	2.2	0.89	0.41	2.11	19.68	5.27	urinary_tract	0.31	-5.63
HT1197	HDAC_4	HSP90	3	3	0.11	1.48	15.42	0.99	0.96	0	11.41	urinary_tract	2.94	-6.28
HT1376	HDAC_4	HSP90	3	3	0.07	2.08	9.88	0.96	1.02	0	-10.85	urinary_tract	-3.77	-8.65
J82	HDAC_4	HSP90	3	3	0.07	1.11	16.7	1.42	1.42	0	-0.23	urinary_tract	6.05	8.16
SW780	HDAC_4	HSP90	0.3	3	0.3	10	10	2.48	0.8	0	24.9	urinary_tract	6.3	9.19
T24	HDAC_4	HSP90	0.3	3	0.09	10	7.7	1.13	10	15.9	-29.63	urinary_tract	-1.42	-6.28
TCCSUP	HDAC_4	HSP90	0.3	3	0.18	1.58	0	0.74	1.14	0.08	-5.69	urinary_tract	6.45	9.68
UMUC3	HDAC_4	HSP90	0.3	3	0.15	2.58	0	1.7	2.14	0	-34.35	urinary_tract	6.56	-5.33
647V	HDAC_4	IAP	3	3	0	2.67	16.86	1.22	2.9	24.6	-5.73	urinary_tract	9.03	-10.03
BFTC905	HDAC_4	IAP	3	3	0	0.25	0	0.35	1.93	16.8	-3.86	urinary_tract	5.94	-9.26
HT1197	HDAC_4	IAP	3	3	3	1.32	11.57	0.84	1.45	13.5	-4.1	urinary_tract	13.78	-10.03
HT1376	HDAC_4	IAP	3	3	0.03	0.31	0	0.73	0.96	0.84	13.45	urinary_tract	2.55	-11.87
J82	HDAC_4	IAP	3	3	0	0.2	0	1.55	1.39	0	-45.49	urinary_tract	3.75	-0.11
SW780	HDAC_4	IAP	0.03	3	0	1.56	59.97	1	0.49	0	51.85	urinary_tract	5.9	1.64
TCCSUP	HDAC_4	IAP	0.03	3	0	0.58	62.77	0.62	1.23	0.91	2.11	urinary_tract	7.93	7.14
UMUC3	HDAC_4	IAP	0.03	3	0	0.97	61.55	1.1	10	30.4	-25.44	urinary_tract	8.55	-9.54
647V	HDAC_4	MAP2K_1	1	3	0.31	10	78.6	1.05	10	30.8	21.35	urinary_tract	9.2	-7.63
BFTC905	HDAC_4	MAP2K_1	3	3	1.8	1.23	0	0.47	1.18	8.41	47.11	urinary_tract	11.41	-4.24
BT474	HDAC_4	MAP2K_1	1	1	0.08	1.23	83.7	1	0	100	-32.16	breast	4.56	-7.33
CAMA1	HDAC_4	MAP2K_1	1	1	0.08	1.34	75.74	1	10	12.2	13.27	breast	-6.42	-8.1
HCC1419	HDAC_4	MAP2K_1	1	1	1	0.45	16.51	1	0.19	75.05	-11.08	breast	5.94	5.79
HCC1500	HDAC_4	MAP2K_1	1	1	0.41	1.42	73.76	1	10	23.8	17.31	breast	3.38	-2.58
HT1197	HDAC_4	MAP2K_1	1	3	1	0.47	55.17	1.21	0.89	0	23.36	urinary_tract	10.82	-7.63
HT1376	HDAC_4	MAP2K_1	3	3	3	1.15	22.88	0.99	10	27.5	17.68	urinary_tract	7.09	-7.75
J82	HDAC_4	MAP2K_1	3	3	0.19	0.38	59.08	1.33	2.18	17.85	-1.76	urinary_tract	4.34	2.3
MCF 7,00	HDAC_4	MAP2K_1	1	1	0.27	10	89.6	0.36	10	53.8	32.96	breast	13.36	-0.58
MDAMB175VII	HDAC_4	MAP2K_1	1	1	1	10	84.8	0.32	10	51.2	7.34	breast	13.14	-7.63
MDAMB361	HDAC_4	MAP2K_1	1	1	1	0.44	78.16	0.36	2.92	26.67	16.34	breast	4.12	-3.89
SW780	HDAC_4	MAP2K_1	3	3	1.14	10	58.7	1.58	0.66	0.1	-10.24	urinary_tract	17.63	9.31
T24	HDAC_4	MAP2K_1	3	3	0.28	1.15	24.31	1.18	10	15.09	-7.5	urinary_tract	2.49	-7.63
T47D	HDAC_4	MAP2K_1	1	1	0.09	2.27	85.7	1	0	100	17.57	breast	0.42	14.89
TCCSUP	HDAC_4	MAP2K_1	3	3	3	0.25	21.37	0.66	1.18	0	24.35	urinary_tract	2.36	4.79
UACC812	HDAC_4	MAP2K_1	1	1	0.01	10	89.5	1	1.37	38.2	-12.54	breast	-2.96	-6.9
UMUC3	HDAC_4	MAP2K_1	3	3	0.28	10	58.1	1.15	10	32.9	-19.36	urinary_tract	6.42	-7.94
VMCUB1	HDAC_4	MAP2K_1	3	3	0.42	1.45	76.9	3	10	7.2	12.69	urinary_tract	8.4	1.68
647V	HDAC_4	MTOR_1	1	3	0.53	1.57	23.78	1.09	2.12	12.84	-1.8	urinary_tract	7.59	-7.42
BFTC905	HDAC_4	MTOR_1	3	3	0.29	1.37	22.48	0.36	1.54	14.1	25.94	urinary_tract	7.94	-7.6
BT474	HDAC_4	MTOR_1	1	1	0.32	2.28	27.68	1	0	100	-30.79	breast	0.57	-6.89
HCC1419	HDAC_4	MTOR_1	1	1	0.24	10	34.4	1	0	100	1.26	breast	3.1	-3.31
HCC1500	HDAC_4	MTOR_1	1	1	0.08	1.41	10.34	1	1.02	43.7	21.01	breast	-0.28	1.61
HT1197	HDAC_4	MTOR_1	3	3	2.4	0.72	0	0.83	1.17	5.67	3.62	urinary_tract	2.43	-7.42
HT1376	HDAC_4	MTOR_1	3	3	0.53	0.94	21.2	1.31	1.03	1.32	16.15	urinary_tract	0.96	-1.06
J82	HDAC_4	MTOR_1	3	3	0.56	1.28	22.97	0.98	3.45	22.21	13.8	urinary_tract	4.39	4.71
MCF 7,00	HDAC_4	MTOR_1	1	1	0.13	2.07	7.91	0.47	2.62	52.38	7.88	breast	9.17	1.59
MDAMB361	HDAC_4	MTOR_1	1	1	0.2	1.96	38.94	0.46	2.38	27.41	3.41	breast	4.25	-6.94
SW780	HDAC_4	MTOR_1	3	3	0.44	1.65	29.64	0.55	0.6	10.9	-0.22	urinary_tract	4.67	8.21
T24	HDAC_4	MTOR_1	3	3	0.93	2.51	9.95	1.07	10	9.8	3.96	urinary_tract	0.12	-7.42
T47D	HDAC_4	MTOR_1	1	1	0.03	10	63.27	1	0	100	-13.6	breast	-1.01	7.43
TCCSUP	HDAC_4	MTOR_1	1	3	1	0.81	0.41	0.64	1.32	0	-2.29	urinary_tract	10.4	7.38
UACC812	HDAC_4	MTOR_1	1	1	0.43	10	47.79	0.34	10	78.4	-1.39	breast	-0.21	-6.99
UMUC3	HDAC_4	MTOR_1	1	3	1	10	38.2	1.07	10	23.2	-14.38	urinary_tract	3.99	-7.44
VMCUB1	HDAC_4	MTOR_1	1	3	0.33	3.36	42.78	2.42	2.01	0	-13.09	urinary_tract	10.24	-5.26
647V	HDAC_4	PARP1	3	3	1.28	2.97	88.88	1.14	4.58	26.12	17.15	urinary_tract	4.13	-5.4
BFTC905	HDAC_4	PARP1	3	3	3	0.83	37.92	0.39	1.19	7.56	1.1	urinary_tract	5.3	-5.21
BT474	HDAC_4	PARP1	1	1	1	0	100	1	0	100	-23.67	breast	3.79	-5.32
HCC1500	HDAC_4	PARP1	1	1	0.18	0.92	52.91	0.17	10	59.83	-21.82	breast	3.39	-4.17
HT1197	HDAC_4	PARP1	3	3	3	0.45	13.43	1.03	1.46	2.77	1.82	urinary_tract	4.72	-5.4
647V	HDAC_4	PIK3C	3	3	0.99	1.88	46.65	1.14	2.63	16.23	20.25	urinary_tract	0.79	-12.74
BFTC905	HDAC_4	PIK3C	3	3	1.4	0.7	0	0.29	10	18.6	7.8	urinary_tract	6.76	-12.74
HT1197	HDAC_4	PIK3C	3	3	0.8	3.78	59.34	0.8	3	31.6	29.49	urinary_tract	2.29	-12.74
J82	HDAC_4	PIK3C	3	3	0.72	0.87	20.61	0.95	1.73	10.47	4.73	urinary_tract	0.85	3.97
SW780	HDAC_4	PIK3C	3	3	3	10	90.6	0.79	0.61	2.55	-18.43	urinary_tract	-3.56	0.03
T24	HDAC_4	PIK3C	3	3	1.02	10	56.7	1.13	10	16.7	18.43	urinary_tract	-6.52	-12.74
TCCSUP	HDAC_4	PIK3C	1	3	0.3	10	56.9	0.59	1.77	10.12	0.61	urinary_tract	0.86	4.18
UMUC3	HDAC_4	PIK3C	3	3	2.29	1.19	4.77	1.86	2.19	0	-1.42	urinary_tract	-3.35	-12.98
647V	HDAC_4	PIK3CB_PIK3CD	3	3	0.57	1.27	6.78	1.26	2.59	0	4.9	urinary_tract	2.79	-8.8
BFTC905	HDAC_4	PIK3CB_PIK3CD	3	3	0.27	1.02	21.64	0.34	2.25	14.74	19.25	urinary_tract	6.95	-7.09
HT1376	HDAC_4	PIK3CB_PIK3CD	3	3	0.13	0.57	27.83	0.55	1.23	25.86	2.04	urinary_tract	3.85	-3.61
J82	HDAC_4	PIK3CB_PIK3CD	3	3	1.76	0.46	0	1.17	1.41	0	-2.65	urinary_tract	3.05	1.45
SW780	HDAC_4	PIK3CB_PIK3CD	3	3	1	0	100	0.99	0.6	0	10.3	urinary_tract	-2.17	8.92
T24	HDAC_4	PIK3CB_PIK3CD	3	3	1.26	10	79.9	1.07	10	13	32	urinary_tract	-1.18	-8.8
TCCSUP	HDAC_4	PIK3CB_PIK3CD	3	3	3	1.03	22.94	0.71	1.51	4.4	12.46	urinary_tract	4.37	9.52
UMUC3	HDAC_4	PIK3CB_PIK3CD	3	3	1.13	4.46	78.74	1.11	10	24.5	5.03	urinary_tract	-1.2	-9.08
647V	HDAC_4	PIM1	3	3	0.05	10	88.86	1.09	4.25	28.86	6.08	urinary_tract	23.88	-11.49
BFTC905	HDAC_4	PIM1	3	3	1	0	100	0.61	1.97	17.91	108.85	urinary_tract	25.48	-9.74
HT1197	HDAC_4	PIM1	3	3	0.08	10	90.27	0.82	2.01	25.99	15.8	urinary_tract	26.89	-11.49
HT1376	HDAC_4	PIM1	3	3	3	0.1	39.97	0.83	2.38	22.74	2.17	urinary_tract	9.94	-12.07
J82	HDAC_4	PIM1	3	3	0.03	0.75	74.82	0.99	3.58	29.1	14.48	urinary_tract	13.9	0.91
SW780	HDAC_4	PIM1	3	3	1	0	100	1.39	0.57	0	17.43	urinary_tract	22.73	7.65
T24	HDAC_4	PIM1	3	3	1	0	100	1.11	10	14.9	-17.4	urinary_tract	10.61	-11.49
TCCSUP	HDAC_4	PIM1	3	3	0.05	10	92.42	0.58	1.48	12.71	18.96	urinary_tract	15.2	9.06
UMUC3	HDAC_4	PIM1	3	3	1	0	100	1.17	10	32.69	4.18	urinary_tract	13.3	-11.49
647V	HDAC_4	SRC	3	3	1.5	10	82.18	1.07	2.13	14.94	0.05	urinary_tract	0.62	-11.32
BFTC905	HDAC_4	SRC	1	3	1	10	58.4	0.29	1.67	16.73	-35.77	urinary_tract	3.68	-9.36
HT1197	HDAC_4	SRC	3	3	0	0.1	80.06	1.32	1.15	0	-7.67	urinary_tract	3.59	-11.32
J82	HDAC_4	SRC	3	3	0.1	1.04	74.22	1.34	1.41	0	-6.91	urinary_tract	3.2	3.55
T24	HDAC_4	SRC	3	3	0.85	3.12	25.87	1.11	10	15.1	-7.02	urinary_tract	-0.42	-11.32
TCCSUP	HDAC_4	SRC	3	3	0.3	10	71	0.66	1.3	0	-7.93	urinary_tract	4.78	10.87
UMUC3	HDAC_4	SRC	3	3	1.46	2.96	59.19	1.06	10	26.5	-16.46	urinary_tract	5.92	-11.32
647V	HSP90	IAP	3	3	0	1.67	6.6	0.13	4.27	4.45	-24.33	urinary_tract	22.49	19.65
BFTC905	HSP90	IAP	3	3	0	0.3	0	0.08	2.45	1.63	-4.15	urinary_tract	19.72	16.23
HT1197	HSP90	IAP	3	3	3	10	29.8	0.15	2.48	24.69	-4.39	urinary_tract	22.09	19.65
HT1376	HSP90	IAP	3	3	0.06	0.24	0	0.07	2.17	12.85	23.16	urinary_tract	14.44	14.82
J82	HSP90	IAP	3	3	0.01	1.35	25.27	0.1	2.87	22.19	-18.61	urinary_tract	15.71	0.12
SW780	HSP90	IAP	0.03	0.3	0	1.01	57.18	0.28	3.74	0	7.5	urinary_tract	18.82	-25.79
T24	HSP90	IAP	1	0.3	1	0.73	49.3	0.09	10	8	-16.39	urinary_tract	35.18	19.65
TCCSUP	HSP90	IAP	0.03	0.3	0	1.3	75.29	0.11	10	19.5	54.36	urinary_tract	28.66	10.1
UMUC3	HSP90	IAP	0.03	0.3	0	1.42	67.65	0.18	2.97	0	-12.54	urinary_tract	19.9	11.19
647V	HSP90	MAP2K_1	1	3	0.33	9.98	82.3	0.18	4.01	5.18	24.2	urinary_tract	17.47	16.37
BT474	HSP90	MAP2K_1	1	1	1	0.45	50.13	0.04	2.22	4.58	8.37	breast	16.72	8.77
HT1197	HSP90	MAP2K_1	1	3	0.06	10	90.12	0.13	2.16	23.53	20.84	urinary_tract	17.13	16.37
T47D	HSP90	MAP2K_1	1	1	1	0.27	66.32	0.06	4.04	29.68	-6.58	breast	14.94	18.67
TCCSUP	HSP90	MAP2K_1	3	0.3	3	0.24	21.8	0.16	2.04	0	16.32	urinary_tract	11.91	-2.68
647V	HSP90	MTOR_1	1	3	0.36	3.37	47.68	0.13	4.31	4.42	-11.79	urinary_tract	13.07	6.72
BFTC905	HSP90	MTOR_1	3	3	0.31	1.79	26.64	0.11	2.13	0	-2.46	urinary_tract	17	4.29
BT474	HSP90	MTOR_1	1	1	0.57	1.6	13.3	0.05	2.41	4.95	-5.98	breast	12.81	3.75
CAMA1	HSP90	MTOR_1	1	1	0.29	10	59.1	0.16	10	18.82	11.4	breast	5.7	11.09
HCC1419	HSP90	MTOR_1	1	1	0.18	3.29	26.99	0.1	1.94	11.56	9.88	breast	9.93	-0.97
HCC1500	HSP90	MTOR_1	1	1	0.09	1.22	7.51	0.11	2.79	0	1.09	breast	10.55	15.81
HT1197	HSP90	MTOR_1	3	3	0.31	1.73	41.19	0.11	1.62	20.79	-14.4	urinary_tract	12.4	6.72
HT1376	HSP90	MTOR_1	3	3	0.73	1.16	17.72	0.09	1.9	15.27	-2.07	urinary_tract	7.72	10.47
J82	HSP90	MTOR_1	3	3	0.79	1.78	24.77	0.1	1.56	12.09	9.44	urinary_tract	12.77	5.2
MCF 7,00	HSP90	MTOR_1	1	1	0.16	1.12	0	0.04	3.28	10.06	3.32	breast	18.04	14.6
MDAMB361	HSP90	MTOR_1	1	1	0.24	1.18	28.42	0.11	1.9	1.36	7.52	breast	19.56	5.18
SW780	HSP90	MTOR_1	3	0.3	0.56	2.5	30.98	0.25	2.35	0	-16.67	urinary_tract	9.23	1.77
T24	HSP90	MTOR_1	3	0.3	0.95	2.77	14.41	0.07	4.13	6.8	-24.46	urinary_tract	11.14	6.72
T47D	HSP90	MTOR_1	1	1	0.03	2.83	62.24	0.08	10	25.35	-3.54	breast	9.93	9.43
TCCSUP	HSP90	MTOR_1	1	0.3	0.38	1.12	30.15	0.15	2.03	0	-22.23	urinary_tract	13.36	4.66
UMUC3	HSP90	MTOR_1	1	0.3	0.36	10	67.3	0.15	2.67	0	-10.12	urinary_tract	12.19	8.12
CAMA1	HSP90	PARP1	1	1	0	0.1	82.78	0.11	0.83	0	-15.87	breast	10.43	6.57
HCC1419	HSP90	PARP1	1	1	1	0	100	0.08	1.44	11.5	7.1	breast	14.15	9.17
HCC1500	HSP90	PARP1	1	1	0.21	1.06	45.41	0.07	2.89	0	14.55	breast	13.63	7.35
MDAMB361	HSP90	PARP1	1	1	1	0	100	0.11	2	4.23	1.68	breast	16.08	-2.37
TCCSUP	HSP90	PARP1	3	0.3	1.51	1.82	61.77	0.16	1.71	0	47.27	urinary_tract	10.5	15.48
UACC812	HSP90	PARP1	1	1	0.16	1.82	92.88	0.05	10	0	5.27	breast	10.66	9.15
BFTC905	HSP90	PIK3C	3	3	0.93	0.8	3.67	0.08	1.63	0	0.24	urinary_tract	18.16	0.81
J82	HSP90	PIK3C	3	3	0.61	1.6	35.89	0.08	1.39	12.8	7.07	urinary_tract	1.39	17.95
SW780	HSP90	PIK3C	3	0.3	3	10	75.4	0.27	2.63	0	3.17	urinary_tract	-5.77	-14.79
647V	HSP90	PIK3CB_PIK3CD	3	3	0.55	1.37	4.99	0.13	4.38	4.48	-14.18	urinary_tract	0.25	3.44
BFTC905	HSP90	PIK3CB_PIK3CD	3	3	0.21	1.26	28.81	0.1	5.81	3.35	0.58	urinary_tract	11.23	4.19
HT1376	HSP90	PIK3CB_PIK3CD	3	3	0.06	0.91	41.68	0.1	3.99	15.4	7.78	urinary_tract	12.87	13.93
J82	HSP90	PIK3CB_PIK3CD	3	3	2.12	0.39	0	0.09	1.75	11.32	9.28	urinary_tract	6.41	6.59
SW780	HSP90	PIK3CB_PIK3CD	3	0.3	1	0	100	0.26	3.93	0	-20.9	urinary_tract	-7.82	8.07
T24	HSP90	PIK3CB_PIK3CD	3	0.3	3	10	93.4	0.09	10	10.4	-3.29	urinary_tract	0.16	3.44
TCCSUP	HSP90	PIK3CB_PIK3CD	3	0.3	3	0.59	25.89	0.1	10	19.6	15.42	urinary_tract	5.79	6.69
UMUC3	HSP90	PIK3CB_PIK3CD	3	0.3	3	1.17	58.05	0.16	3.09	0	-1.66	urinary_tract	-0.94	-0.77
VMCUB1	HSP90	PIK3CB_PIK3CD	3	0.3	1.27	1.48	70.19	0.11	9.81	17	-10.87	urinary_tract	2.33	5.68
647V	HSP90	PIM1	3	3	1	0	100	0.16	3.94	5.09	10.28	urinary_tract	25.47	15.17
BFTC905	HSP90	PIM1	3	3	2.16	1.86	80.7	0.08	3.13	3.6	29.88	urinary_tract	31.25	15.32
HT1197	HSP90	PIM1	3	3	0.1	10	82.1	0.13	2.11	22.9	12.29	urinary_tract	32.42	15.17
HT1376	HSP90	PIM1	3	3	0.15	0.61	48.44	0.07	2.04	10.19	-23.17	urinary_tract	11.64	15.17
J82	HSP90	PIM1	3	3	0.22	3.41	86.12	0.11	2.24	20.87	19.31	urinary_tract	11.14	-2.92
SW780	HSP90	PIM1	3	0.3	1	0	100	0.26	1.95	0	-6.18	urinary_tract	14.71	-1.77
T24	HSP90	PIM1	3	0.3	1	0	100	0.09	5.3	8.91	9.7	urinary_tract	12.53	15.17
TCCSUP	HSP90	PIM1	3	0.3	0.06	1.43	84.21	0.18	1.76	0	9.05	urinary_tract	13.99	4.89
UMUC3	HSP90	PIM1	3	0.3	1	0	100	0.11	10	17.99	-7.15	urinary_tract	13.86	15.37
647V	HSP90	SRC	3	3	3	10	72.4	0.13	4.41	4.7	-1.14	urinary_tract	7.47	13.18
BFTC905	HSP90	SRC	1	3	1	10	62.2	0.09	2.22	1.64	-8.1	urinary_tract	10.32	10
HT1197	HSP90	SRC	3	3	1	0	100	0.11	1.98	24.14	-12.07	urinary_tract	9.8	13.18
J82	HSP90	SRC	3	3	0.24	0.8	73.29	0.1	1.85	13.32	5.05	urinary_tract	9.64	12.69
T24	HSP90	SRC	3	0.3	0.91	2.63	23.53	0.08	2.97	3.95	-14.06	urinary_tract	7.71	13.18
TCCSUP	HSP90	SRC	3	0.3	0.56	1.5	63.54	0.15	2.18	0	-7.57	urinary_tract	10.15	13.39
UMUC3	HSP90	SRC	3	0.3	3	1.42	25.82	0.16	2.62	0	0.93	urinary_tract	9.29	14.29
VMCUB1	HSP90	SRC	1	0.3	1	0	100	0.17	3.74	0	3.86	urinary_tract	3.22	1.56
647V	IAP	MAP2K_1	1	3	0.6	0.88	64.02	0	1.53	0	45.64	urinary_tract	21.24	10.13
BFTC905	IAP	MAP2K_1	3	3	1.94	0.86	0	0	0.43	7.81	-20.85	urinary_tract	25.54	11.76
HT1197	IAP	MAP2K_1	1	3	0.27	10	72.2	3	10	15.4	25.46	urinary_tract	20.84	10.13
HT1376	IAP	MAP2K_1	3	3	3	0.55	31.85	0.06	0.25	0	72.65	urinary_tract	16.13	5.94
J82	IAP	MAP2K_1	3	3	3	0.35	43.59	0	0.33	16.3	50.24	urinary_tract	18.03	-2.72
SW780	IAP	MAP2K_1	3	0.03	1.17	10	58	0	1.13	63.67	-130.23	urinary_tract	16.48	0.48
T24	IAP	MAP2K_1	3	1	0.38	0.9	14.6	0.07	1.86	83.73	-32	urinary_tract	21.97	10.13
TCCSUP	IAP	MAP2K_1	3	0.03	3	0.27	22.23	0	0.58	67.51	83.88	urinary_tract	16.45	-0.39
UMUC3	IAP	MAP2K_1	3	0.03	0.23	2.1	59.92	0	0.94	64.87	23.96	urinary_tract	9.91	-0.93
VMCUB1	IAP	MAP2K_1	3	0.03	3	0.63	63.04	0	1.31	75.22	2.5	urinary_tract	5.66	10.41
647V	IAP	MTOR_1	1	3	0.83	1.13	0	0	1.56	13.13	-12.49	urinary_tract	24.18	11.67
BFTC905	IAP	MTOR_1	3	3	0.27	1.12	15.54	0	0.25	0	13.47	urinary_tract	24.6	6.14
HT1376	IAP	MTOR_1	3	3	0.54	1.17	30.78	0.28	0.21	0	41.87	urinary_tract	16.46	13.14
J82	IAP	MTOR_1	3	3	0.79	0.72	0	0.01	0.89	25.35	-3.72	urinary_tract	18.22	-2.94
SW780	IAP	MTOR_1	3	0.03	0.61	2.22	33.24	0	0.81	45.86	32.57	urinary_tract	10.8	-24.95
T24	IAP	MTOR_1	3	1	1	10	21.6	0.04	10	92.57	5.22	urinary_tract	29.6	11.67
TCCSUP	IAP	MTOR_1	1	0.03	0.39	1.16	35.17	0.03	0.22	39.91	35.89	urinary_tract	27.35	14.97
UMUC3	IAP	MTOR_1	1	0.03	1	1.74	44.25	0	1.1	64.93	-13.66	urinary_tract	19.54	-0.3
VMCUB1	IAP	MTOR_1	1	0.03	0.6	1.43	18.24	0	0.78	61.84	31.76	urinary_tract	17.03	1.25
647V	IAP	PARP1	3	3	3	10	79.2	0	1.95	14.78	32.97	urinary_tract	21.36	14.47
C32	IAP	PARP1	10	1	6.91	1.77	0	0.01	10	8.9	20.95	large_intestine	15.79	-5.78
HT29	IAP	PARP1	10	1	0	0.1	85.66	1	0	100	-38	large_intestine	15.96	6.48
SW837	IAP	PARP1	10	1	2.14	2.25	1.92	0.06	1.88	84.73	52.41	large_intestine	28.4	15.96
SW948	IAP	PARP1	10	1	10	0.96	18.74	0.06	10	77.64	18.84	large_intestine	17.9	9.32
UMUC3	IAP	PARP1	3	0.03	3	0.78	81.62	0	0.87	64.1	18.12	urinary_tract	15.81	6.07
647V	IAP	PIK3C	3	3	0.94	1.72	44.41	0	1.45	3.52	2.6	urinary_tract	17.57	10.32
A549	IAP	PIK3C	3	3	1.49	1.49	40.45	3	0.21	66.54	34.74	lung	11.27	-3.67
C32	IAP	PIK3C	10	1	2.17	1.27	4.89	0	0.64	5.59	4.26	large_intestine	6.59	-7.23
HT1376	IAP	PIK3C	3	3	1.84	0.67	0	0.09	0.24	0	32.09	urinary_tract	9.62	9.76
LS513	IAP	PIK3C	10	1	0.79	1.31	5.35	0.53	0.83	79.23	12.44	large_intestine	1.69	-2.44
NCIH1299	IAP	PIK3C	3	1	1.01	0.85	11.34	0.05	1.13	36.39	74.97	lung	32.99	10.32
NCIH1437	IAP	PIK3C	3	1	1.67	0.42	29.1	1	0.18	45.65	58.9	lung	13.96	5.91
NCIH2228	IAP	PIK3C	1	0.3	0.57	0.68	0	0.01	0.75	22.12	4.45	lung	17.77	9.33
NCIH23	IAP	PIK3C	3	1	0.5	1.38	26.09	0.15	0.21	0	53.56	lung	25.7	4.68
NCIH522	IAP	PIK3C	3	0.3	3	0.33	3.66	0	0.21	2.55	23.67	lung	23.11	15.05
RKO	IAP	PIK3C	10	1	1.61	2.5	16.16	1	0.8	73.86	41.29	large_intestine	18.04	21.64
SW620	IAP	PIK3C	3	1	1.09	10	69.2	1	0	100	-21.51	large_intestine	0.92	-11.17
SW780	IAP	PIK3C	3	0.03	3	10	85	0	1.26	58.1	-78.68	urinary_tract	-4.51	-33.81
T24	IAP	PIK3C	3	1	1.07	10	49.2	0.23	1.74	78.53	43.42	urinary_tract	12.2	10.32
647V	IAP	PIK3CB_PIK3CD	3	3	0.76	1.53	10.26	0	1.71	7.36	-0.23	urinary_tract	16.51	14.94
BFTC905	IAP	PIK3CB_PIK3CD	3	3	0.36	1.38	21.09	0	0.25	0	-2.44	urinary_tract	14.7	13.71
HT1376	IAP	PIK3CB_PIK3CD	3	3	0.37	0.95	25.19	0.06	0.17	0	2.97	urinary_tract	15.89	17.77
J82	IAP	PIK3CB_PIK3CD	3	3	2.33	0.45	0	0.01	1.11	24.21	13.18	urinary_tract	19.35	-1.19
SW780	IAP	PIK3CB_PIK3CD	3	0.03	1	0	100	0.01	0.41	26.52	-82.61	urinary_tract	-4.99	-35.55
T24	IAP	PIK3CB_PIK3CD	3	1	3	10	67.8	0.5	1.63	78.06	9.04	urinary_tract	15.19	14.94
TCCSUP	IAP	PIK3CB_PIK3CD	3	0.03	3	0.48	24.84	0	1.34	68.05	-2.65	urinary_tract	19.91	-1.11
UMUC3	IAP	PIK3CB_PIK3CD	3	0.03	0.98	10	84.3	0	0.87	65.69	-22.07	urinary_tract	1.94	-8.12
VMCUB1	IAP	PIK3CB_PIK3CD	3	0.03	3	1.33	58.1	0	10	62.6	-34.07	urinary_tract	11.37	1.22
647V	IAP	PIM1	3	3	1	0	100	0	1.67	4	39.18	urinary_tract	27.7	21.06
BFTC905	IAP	PIM1	3	3	3	0.32	75.21	0	0.27	0	-4.31	urinary_tract	31.26	19
HT1197	IAP	PIM1	3	3	0	0.1	55.96	1.3	10	60.89	2.43	urinary_tract	32.94	21.06
HT1376	IAP	PIM1	3	3	0.04	10	82.97	0.03	0.26	0	3.67	urinary_tract	16.91	16.72
J82	IAP	PIM1	3	3	0.04	10	88.32	0	0.11	0	21.02	urinary_tract	13.43	-7.87
SW780	IAP	PIM1	3	0.03	3	10	91.4	0	0.94	58.39	39.44	urinary_tract	17.53	-28.81
T24	IAP	PIM1	3	1	1	0	100	0.54	1.46	81.91	2.18	urinary_tract	23.08	21.06
TCCSUP	IAP	PIM1	3	0.03	2.46	0.49	70.24	0	0.43	65.23	17.58	urinary_tract	21.49	8.2
VMCUB1	IAP	PIM1	3	0.03	1	0	100	0.03	0.85	0	-3.89	urinary_tract	15.19	4.1
647V	IAP	SRC	3	3	1.42	10	86.59	0	1.4	8.46	30.81	urinary_tract	11.56	20.52
BFTC905	IAP	SRC	1	3	1	0.52	65.82	0	0.27	0	-26.08	urinary_tract	12.69	17.46
HT1197	IAP	SRC	3	3	0	8.82	74.64	2.1	0.58	0	-76.4	urinary_tract	12.71	20.52
HT1376	IAP	SRC	3	3	1.26	0.59	35.35	0.1	0.24	0	22.5	urinary_tract	15.76	9.33
J82	IAP	SRC	3	3	0.17	1.18	72.12	0	0.37	21.26	22.58	urinary_tract	12.47	-2.56
T24	IAP	SRC	3	1	0.95	4.04	26.5	1	0.56	81.24	80.24	urinary_tract	12.18	20.52
TCCSUP	IAP	SRC	3	0.03	0.73	0.55	54.03	0	0.46	53.03	34.35	urinary_tract	15.27	9.21
UMUC3	IAP	SRC	3	0.03	1.15	10	64.2	0	1.41	68.54	12.88	urinary_tract	12.53	0.71
DMS114	IAP	TNF	0.1	3	0	10	87.55	0.75	0.52	0	-84.89	lung	27.28	1.95
J82	IAP	TNF	0.1	3	1	0	100	0	0.12	0	-4.07	urinary_tract	32.16	-0.06
NCIH1703	IAP	TNF	0.1	3	0	1.68	8.29	0	0.62	10.11	27.3	lung	26.47	13.18
RT4	IAP	TNF	0.1	3	0.01	2.05	9.65	0.55	0.35	69.06	193.85	urinary_tract	52.06	5.38
VMCUB1	IAP	TNF	0.03	0.03	1	0	100	0	1.55	71.83	65.29	urinary_tract	32.52	5.72
647V	IAP	TNFSF10	0.03	3	0.03	2.68	92.01	0	1.65	7.62	14.84	urinary_tract	25.58	17.88
A549	IAP	TNFSF10	0.03	3	1	0	100	3	0.2	67.97	0.5	lung	27	-0.71
BFTC905	IAP	TNFSF10	0.03	3	0.03	0.74	29.71	0	0.28	0	11.09	urinary_tract	26.54	12.53
BT20	IAP	TNFSF10	0.03	1	0.01	1.7	0	0.28	0.57	71.96	120.89	breast	41.33	15.66
BT549	IAP	TNFSF10	0.03	1	0	0.48	22.79	0.18	3.12	42.96	75.41	breast	26.13	17.88
C32	IAP	TNFSF10	0.1	1	0.03	0.96	13.77	0	0.9	11	44.96	large_intestine	20.06	-6.5
CAL148	IAP	TNFSF10	0.03	1	1	0	100	0	0.1	12.03	32.74	breast	23.29	7.14
CAL51	IAP	TNFSF10	0.03	1	0.03	0.48	76.48	0.46	0.28	64.63	10.34	breast	19.77	7.8
CAMA1	IAP	TNFSF10	0.03	1	0	2.3	5.58	0	0.75	13.33	33.71	breast	20.5	13.01
DMS114	IAP	TNFSF10	0.03	3	0.03	10	82.8	0.64	0.44	0	-59.46	lung	23.84	0.68
DU4475	IAP	TNFSF10	0.03	1	0.01	2.28	32.88	0.09	0.99	60.22	115.46	breast	23.98	12.53
HCC1143	IAP	TNFSF10	0.03	1	1	0	100	0.23	10	27.8	9.07	breast	23.32	5.46
HCC1187	IAP	TNFSF10	0.03	1	0.01	10	94.45	0.25	10	93.3	49.91	breast	24.61	-33.74
HCC1395	IAP	TNFSF10	0.03	1	0.03	10	89	0.7	0.27	49.81	69.9	breast	24.36	3.01
HCC1428	IAP	TNFSF10	0.03	1	0	10	94.92	0.1	10	73.7	-21.81	breast	22.48	-6.9
HCC1806	IAP	TNFSF10	0.03	1	0.03	1.56	2.22	0.11	10	93.75	71.66	breast	28.96	3.91
HCC1937	IAP	TNFSF10	0.03	1	1	0	100	0.01	10	84.15	6.45	breast	30.83	6.85
HCC38	IAP	TNFSF10	0.03	1	0.03	10	79	0.01	0.74	28.4	20.79	breast	26.25	8.98
HCC70	IAP	TNFSF10	0.03	1	1	0	100	0	8.48	15.18	0.67	breast	19.5	-12.74
HT1197	IAP	TNFSF10	0.03	3	0	0.1	85.1	3	0.52	13.68	-14.32	urinary_tract	25.77	17.88
HT1376	IAP	TNFSF10	0.03	3	0.03	0.61	58.36	0.01	0.25	0	-28.78	urinary_tract	16.58	12.79
HT29	IAP	TNFSF10	0.1	1	0	0.1	92.1	0.3	10	86.7	178.35	large_intestine	35.53	10.29
J82	IAP	TNFSF10	0.03	3	1	0	100	0	0.52	22.83	-2.22	urinary_tract	19.05	-5.3
KATOIII	IAP	TNFSF10	0.03	3	1	0	100	0.03	0.9	50.1	114.06	stomach	51.14	-1.31
MDAMB157	IAP	TNFSF10	0.03	1	0.01	1.56	8.37	0	0.1	20.09	61.04	breast	31.18	17.88
MDAMB436	IAP	TNFSF10	0.03	1	0.01	2.26	63.48	0	0.1	93.59	138.87	breast	27.97	7.94
MDAMB453	IAP	TNFSF10	0.03	1	1	0	100	0	0.1	57.6	75.94	breast	18.94	5.2
MDAMB468	IAP	TNFSF10	0.03	1	0.03	2.07	7.16	1	0.25	11.21	100.71	breast	31.75	16.35
NCIH1299	IAP	TNFSF10	0.03	1	1	0	100	0.06	0.99	38.77	34.62	lung	40.22	17.88
NCIH1437	IAP	TNFSF10	0.03	1	0.01	1.62	0	0	0.1	62.24	91.03	lung	35.71	17.77
NCIH1563	IAP	TNFSF10	0.03	1	0	0.1	88.08	0.01	0.93	15.67	5.11	lung	12.91	-2.99
NCIH1703	IAP	TNFSF10	0.03	3	0.01	10	34.1	0	0.85	11.65	29.75	lung	16.21	8.86
NCIH1793	IAP	TNFSF10	0.03	3	0.03	10	93.4	3	0.48	43.18	26.23	lung	41.31	15.96
NCIH1975	IAP	TNFSF10	0.03	3	0	2.29	27.45	0.03	0.78	72.39	121.53	lung	18.26	4.44
NCIH2085	IAP	TNFSF10	0.03	3	0	0.1	90.76	1.66	0.2	0	48.96	lung	30.01	17.88
NCIH2170	IAP	TNFSF10	0.03	3	0.03	0.53	36.26	0	0.1	72.73	56.24	lung	23.48	8.35
NCIH226	IAP	TNFSF10	0.03	3	0.03	1	38.19	0	0.1	14.14	91.43	lung	32.78	17.88
NCIH2291	IAP	TNFSF10	0.03	3	0.03	10	94.4	1.84	1.48	68.2	2.39	lung	27.56	3.19
NCIH23	IAP	TNFSF10	0.03	1	0.01	10	88.3	0.01	0.28	29.6	2.4	lung	33.19	9.27
NCIH3122	IAP	TNFSF10	0.03	0.3	1	0	100	0.01	0.81	68.8	88.2	lung	27.88	17.88
NCIH358	IAP	TNFSF10	0.03	3	0.01	1.09	47.78	0	0.1	79.13	94.89	lung	23.65	10.98
NCIH520	IAP	TNFSF10	0.03	3	1	0	100	1	0	100	26.4	lung	6.83	4.42
NCIH522	IAP	TNFSF10	0.03	0.3	0.02	1.79	0	0	0.33	7.7	49.21	lung	30.42	20.95
NCIH747	IAP	TNFSF10	0.1	1	0.01	0.82	54.35	0.19	0.22	0	40.23	large_intestine	35.81	14.24
NCIH838	IAP	TNFSF10	0.03	1	1	0	100	0.01	0.71	15.36	30.36	lung	36.23	15.04
RKO	IAP	TNFSF10	0.1	1	0.1	10	35.4	0.03	10	88.93	9.99	large_intestine	49.71	33.33
[truncated: 6,095 more rows]

## Sheet: Table B - Figure 5c
Median(Prediction)	Median(Observation)
-0.13	-0.38
-0.24	-0.38
-0.14	-0.14
2.64	-0.25
5.15	-0.47
-0.38	-0.4
-0.51	-0.65
-0.5	-0.52
-0.13	-0.14
-0.34	-0.43
1.59	2.19
-0.31	-0.47
-0.53	-0.59
7.11	6.93
13.42	14.3
12.17	12.26
5.19	2.97
5.14	2.97
1.61	-0.4
-1.12	-1.45
7.5 7	0.54
5.13	5.48
7.45	7.48
6.53	7.01
6.49	7.01
3.37	6.15
2.08	-0.37
3.13	0.71
1.16	1.42
2.1 3	0.83
0.44	-0.59
5.56	-0.33
0.41	-0.25
13.17	13.3
6.8 6	0.93
14.59	15.99
3.14	0
-0.26	-0.33
-0.27	-0.4
5.45	3.14
3.83	3.92
3.04	0.77
3.79	6.55
5.07	11.51
3.75	3.04
3.5 4	0.89
3.24	4.94
3.18	6.06
3.09	-0.87
3.99	1.47
4.07	5.03
12.61	12.87
1.8 1	0.67
1.79	1.68
2.02	3.04
0.28	-0.29
12.59	12.83
1.51	1.68
3.17	4.31
1.59	2.19
-0.38	-0.47
4.17	2.68
4.17	2.68
0.93	-0.67
-0.51	-0.59
0.26	-1.99
7 6.9	3
6.98	6.93
11.55	20.15
12.16	12.26
4.12	-0.47
4.97	2.97
5.19	2.97
5.14	2.97
4.79	2.27
1.46	-0.14
1.64	-0.4
1.61	-0.4
-1.24	-1.45
-0.83	-1.91
-0.73	-0.83
1.3 -	0.69
7.49	7.54
5.29	5.48
7.44	7.48
6.7 7	0.01
6.71	7.01
4.8 4	0.25
3.35	6.15
2.07	-0.37
2.05	2.11
1.24	-0.89
5.77	3.93
-0.14	-0.39
1.53	-0.73
5.41	8.09
3.01	0.71
1.18	0.54
4.85	1.61
0.16	-0.33
0.16	-0.33
0.02	-0.44
2.08	3.83
3.65	10.66
2.22	12.26
2.28	12.26
2.28	12.26
1.26	-0.89
0.44	-0.59
11.99	8.77
0.1 -	0.25
12.8	13.3
1.07	7.47
1 7.4	7
6.62	6.93
15.2	15.99
3.11	0
-0.24	-0.33
5.72	3.89
1.12	-0.95
3.17	-1.51
-0.27	-0.4
2.77	1.22
7.45	2.44
2.11	0
3.8 3	0.92
1.01	-0.35
7.08	1.6
0.24	-0.14
-0.02	-0.14
-0.2	-0.2
0 0
-0.01	0
-0.06	-0.14
0.22	-0.2
0.32	1.83
0.03	-0.35
1.6 -	0.14
4.28	6.2
2.03	-0.2
-0.12	-0.14
0.48	-0.14
-0.19	-0.2
0 0
0 0
6.55	-0.2
-0.11	-0.14
4.23	-0.2
2.8 0
4.23	-0.2
2.32	1.98
0.6 -	0.25
1.23	4.85
2.29	4.43
0.54	-0.71
1.84	2.11
4.24	4.08
0.96	-0.4
2.18	4.43
2.19	4.43
2.12	3.57
1.27	-1.19
0.73	0.74
1.87	2.77
1.72	-0.53
0.76	-0.14
1.01	-0.46
1.23	-0.2
1.83	-0.33
2.38	5.31
2.15	5.16
1.46	3.36
0.59	-0.65
3.77	3.92
1.43	3.36
1.21	-0.2
-0.43	-0.52
1.07	3.36
0.21	0
2.25	4.86
3.56	4.04
1.48	3.36
2.28	4.86
2.22	-0.62
3.06	4.85
4.46	3.98
1.25	-0.2
2.22	4.86
2.22	4.86
2.36	2.89
1.05	0.98
3.82	3.92
-0.48	-0.52
2.83	2.97
2.19	4.86
2.16	-0.43
0.72	-0.14
0.92	-0.47
1.44	-0.14
2.12	4.85
2.35	7.01
2.53	-0.25
1.98	6.9
1.69	1.03
1.41	1.47
0.76	0.23
1.96	2.27
1.4 0	0.07
2.12	2.57
1.98	3.06
2.22	-0.7
2.71	2.33
3.73	2.11
0.04	-0.14
-0.09	-0.14
-0.19	0
-0.27	-0.29
-0.05	0
-0.21	-0.31
1.44	2.11
-0.2	-0.2
0.08	-0.14
1.87	0
0.72	-0.14
-0.2	0
1.61	-0.25
3.72	0
-0.27	-0.29
-0.09	4.85
2.09	0
6.37	0
0.2 -	0.14
3.87	-0.25
3.71	-0.44
-0.1	-0.2
1.64	-0.27
5.47	8.16
-0.08	-0.32
-0.03	2.45
2.62	-0.14
7.74	-0.29
0.11	-0.14
1.09	1.44
0.17	-0.25
0.18	-0.29
1.48	-0.14
-0.08	-0.14
-0.13	-0.14
0.94	0.62
0.49	-0.53
-0.14	-0.14
4.61	4.85
-0.2	-0.31
-0.14	3.36
-0.03	0
0.51	-0.33
0.07	-0.2
0.06	-0.29
0 0
-0.14	0
-0.14	-0.14
4.48	-0.14
-0.14	0
-0.15	0
2.73	2.85
0.18	-0.14
-0.24	-0.41
-0.29	-0.41
1.37	1.33
1.32	1.33
0.05	0
-0.17	-0.33
-0.16	-0.33
-0.04	-0.33
5.6 6	0.27
-0.07	-0.14
1.37	1.33
0.02	0
0.1 0
-0.08	-0.14
0.01	0
0.07	-0.43
1.37	1.27
1.34	0.92
0.05	-0.41
0.02	-0.14
2.55	2.27
0.08	0
-0.03	-0.29
-0.14	-0.14
-0.18	-0.2
0 0
-0.15	0
1.61	-0.4
-0.24	-0.25
0.6 -	0.25
2.97	-0.33
3.1 -	0.49
0.88	-0.33
2.22	-0.37
1.76	-0.64
0.33	-0.46
0.73	-0.29
2.81	-0.14
6.73	-0.4
4.42	-0.14
5.25	2.68
7.38	11.01
5.68	2.97
4.66	6.27
6.13	6.2
3.75	-0.46
4.37	-0.14
6.04	-0.14
8.43	2.27
4.44	1.98
6.18	6.2
4.73	4.75
3.75	-0.46
4.44	1.98
6.19	6.2
4.71	4.75
3.76	-0.46
4.23	-0.2
5.42	5.73
6.9 1	3.87
5.62	2.97
4.42	5.73
5.8 5	0.2
3.55	-0.49
4.17	-0.29
5.92	-0.14
8.43	6.45
-0.07	-0.09
2.02	1.94
0.13	-0.41
3.44	1.52
0.39	-0.14
4.32	0
7.46	0
0.16	-0.14
2.03	0
-0.14	-0.2
0.21	0
1 0
2.88	0
8.67	0
0.27	0
1.84	-0.72
2.28	6.93
0.09	-0.4
0.05	-0.4
0.29	2.45
4.69	-0.43
2.09	-0.2
2.26	-0.37
2.54	-0.56
0.03	-0.25
0.08	-0.33
2.18	6.97
2.63	7.73
2.45	-0.19
0.37	-0.67
0.44	-0.37
-0.23	-0.25
0.4 -	0.53
0.25	-0.56
4.93	-0.73
0.11	-0.14
0.11	-0.14
0.16	-0.25
0.38	-0.4
1.82	-0.14
0.31	0
0.31	0
0.29	0
0.14	-0.53
0.22	-0.43
0.14	-0.2
-0.08	0
0.21	0
0.2 0
0.13	-0.41
0.07	-0.14
5.29	4.62
0.06	-0.68
0.02	-0.78
0.5 0
2.45	-0.2
6.95	-0.74
0.09	-0.14
0.01	4.85
3.05	-0.29
4.75	-0.43
-0.03	-0.25
1.43	-0.25
0.21	-0.56
0.33	-0.4
0.18	-0.43
2.88	-0.14
5.49	-0.33
3.59	-0.72
4.6 -	0.85
0.43	-1
2.66	-1.06
0.64	-1.72
2.67	0.16
2.36	0.78
3.18	-0.49
3.78	4.85
6.04	0.62
2.28	4.23
0.54	1.77
0.49	0.29
2.45	11.52
1.22	1.12
2.06	1.94
0.67	0.37
2.32	3.46
2.21	2.36
-0.3	-0.68
0.83	-1.53
1.93	-0.43
0.95	9.57
2.62	-0.56
0.02	-0.09
0 -0.	9
-0.69	-1.04
0.06	-0.33
-0.01	-0.49
0.3 2	0.97
0.26	2.04
-0.1	-0.95
-0.11	-0.95
-0.12	-0.25
-0.14	-0.25
2.89	2.97
-0.12	-0.14
0.01	-0.53
0.82	-0.25
0.09	-0.33
1.01	-0.47
1 -0.	47
1.02	-0.47
1.3 0	0.96
-0.07	0.2
0.03	-0.09
-0.09	-0.95
-0.09	-0.95
-0.09	-0.25
-0.11	-0.25
-0.15	-0.25
0.11	1.07
0.71	2.68
1.47	3.05
-0.06	-0.14
2.84	-0.43
1.39	1.09
0.24	-0.71
0.28	-1.02
2.66	-0.53
5.14	6.03
4.99	-0.61
-0.23	-0.37
2.64	4.31
0.57	0.38
-0.2	-0.25
-0.23	-0.56
1.64	1.98
-0.06	-0.2
-0.35	-0.4
0.03	0
2.37	-0.46
2.37	4.85
2.69	2.11
3.49	5.82
3.12	-0.65
5.84	10.16
3.66	-0.74
3.45	-0.43
3.39	3.57
5.04	4.89
2.5 4	0.85
2.45	4.85
1.37	6.27
1.79	2.11
2.06	1
1.96	1
1.98	1
2 1
3.16	-0.59
8.03	4.85
4 0
3.06	1
3.06	1
6.14	4.36
3.09	-0.67
3.53	-0.92
7.92	12.12
3.21	-0.29
16.2	16.2
6.34	6.33
1.29	1.21
5.32	-0.14
10.42	12.84
2.96	6.27
3.21	4.29
4.06	9.16
18.84	19.43
5.05	-0.83
0.76	1.76
0.8 1	0.76
0.62	0.41
6.43	16.98
4.4 -	1.16
4.16	-0.58
0.45	-0.2
5.4 5	0.82
6.97	7.04
6.42	8.12
4.83	20.01
4.83	20.01
3.79	22.42
1.4 1	0.21
2.27	6.93
2.27	6.93
2.27	6.93
2.27	6.93
5.02	-0.85
0.85	1.76
4.31	-0.46
9.86	12.26
5.65	-0.14
9.12	18.44
4.28	4.85
4.28	4.85
7.04	7.07
11.83	18.9
3.94	3.92
7.38	8.77
4.1 -	0.96
4.04	-1.27
4.38	-0.41
5.66	2.93
8.13	29.33
5.1 -	0.14
4.41	-0.46
0.41	-0.14
2.34	-0.33
3.33	3.36
-0.12	-0.4
1.1 -	0.2
3.06	-0.2
0.15	-0.14
3.16	2.47
1.76	-0.25
2.77	-0.57
3.56	3.25
1.51	-0.71
2.26	-0.44
3.2 -	0.25
3.3 0	0.95
3.33	2.27
2.67	3.37
3.2 7	0.82
2.45	2.33
2.61	1.12
3.52	-0.33
2.99	-0.2
3.61	3.82
0.39	-0.14
3.32	3.36
-0.25	-0.4
0.05	-0.14
3.18	-0.25
-0.34	-0.5
-0.2	-0.25
-0.01	-0.2
0.03	-0.29
0.04	0
-0.32	1
-0.32	-0.59
0.27	-0.44
3.63	3.2
0.38	-0.65
0.24	-0.4
-0.35	-0.25
1.34	0
1.37	1.68
0.32	1.99
6.33	1.69
-0.23	1
-0.23	1
-0.13	6.93
-0.52	-0.56
3.23	-0.35
-0.34	-0.33
-0.34	-0.33
-0.33	-0.33
-0.11	-0.67
-0.29	-0.29
-0.02	2.97
-0.07	0
-0.07	-0.33
-0.19	-0.33
1.05	4.85
-0.17	-0.14
5.26	6.93
-0.57	-0.68
-0.79	-0.82
-0.16	-0.14
2.53	2.97
7.8 1	1.66
-0.27	0
-0.25	-0.25
0.22	3.36
-0.17	2.97
-0.24	-0.25
1.85	-0.73
0.15	0.1
-0.33	-0.81
1.18	-0.78
2.88	-0.29
7.33	-0.75
2 1.9	4
0.95	0.38
-0.36	-0.68
0.98	8.4
2 1.9	4
-0.36	-0.68
-0.35	-0.62
0.98	8.4
1.82	-0.76
1.1 0	0.94
2.1 1	0.22
0.8 -	1.27
2.4 1	0.22
2.93	1.84
-0.28	-0.74
0.94	-2
1.75	-0.49
1.07	5.59
3.15	-0.58
2.97	5
2.14	-0.67
2.44	-0.46
3.94	-0.33
7.37	10.09
0.39	-0.58
1.77	-0.95
1.08	-0.62
0.29	-0.02
0.52	0.42
2.89	-0.5
0.31	-0.31
1.56	-0.83
0.29	-0.43
2.59	-0.76
7.06	-1.15
1.96	-0.56
0.65	-0.72
0.22	-0.6
0.71	1.86
2.75	-0.33
7.18	-0.72
-0.13	-0.14
-0.17	-0.2
-0.18	-0.2
-0.17	-0.2
2.12	3
2.55	2.11
-0.31	-0.43
2 1.9	4
-0.24	-0.25
-0.24	-0.25
-0.01	0
-0.1	-0.14
-0.12	-0.14
-0.18	-0.2
-0.07	-0.25
-0.06	-0.2
0.17	-0.2
-0.01	0
3.41	-0.14
2.39	-0.14
-0.13	-0.14
-0.53	-0.56
1.96	1.94
-0.5	-0.53
-0.08	-0.46
9.94	11.51
-0.24	-0.46
9.35	11.51
-0.27	-0.46
9.94	11.51
1.71	1.85
1.19	1.47
5 4.4	9
1.6 0
1.6 0
1.62	4.85
0.54	-0.25
2.27	7.01
0.69	-0.25
0.68	-0.25
0.63	-0.25
1.79	-0.88
1.97	4.69
0.72	-0.33
0.72	-0.33
1.63	10.6
5.52	6.56
1.71	-1.14
1.7 -	1.53
7.24	14.36
1.64	4.16
6.04	6.17
0.1 -	0.38
0.09	-0.38
0.32	1.34
2.75	3.02
3.2 2	0.97
1.98	2.97
1.96	2.97
1.97	2.97
-0.25	-1.04
-0.33	-0.58
-0.26	-0.58
3.25	6.64
-0.01	-0.2
3.57	12.91
1.34	2.45
1.34	2.45
2.67	6.18
0.19	6.73
3.76	12.05
-0.09	-0.2
-0.31	-0.33
5.17	4
0.02	2.5
0.1 0
1.2 0	0.33
-0.36	-0.4
2.71	5.83
4.23	3.4
7.09	5.53
1.12	-0.25
-0.11	1.33
2.57	-0.46
1.52	3.26
0.14	-0.2
4.27	3.77
4.92	-0.9
5.71	-0.49
6.34	4.57
-0.31	2.64
0.62	2.32
0.8 -	0.5
2.66	-0.33
5.9 2	0.58
-0.3	-0.33
0.15	-0.2
2.51	6.93
7.57	16.42
-0.21	-0.5
0.06	-0.27
2.5 3	0.92
6.66	14.35
-0.3	-0.33
0.14	-0.2
2.46	6.93
7.51	16.42
1.38	5.31
-0.3	8.09
-0.31	8.09
-0.31	8.09
-0.13	-1.07
-0.31	-0.5
-0.16	2.97
-0.2	-0.25
0.87	6.07
-0.19	5.73
-0.19	5.73
1.53	1.86
0.48	6.93
-0.19	0
-0.34	-0.2
3.2 2	0.03
-0.48	-0.87
-0.67	-1.24
-0.38	-0.4
2.18	2.27
6.82	2.26
-0.27	-0.14
-0.24	-0.23
-0.17	1.86
1.39	-0.29
2.11	-0.2
4.05	6.93
-0.05	-0.29
2.01	-0.14
4.12	6.93
-0.05	-0.29
2.01	-0.14
4.09	6.93
-0.05	-0.29
2.01	-0.14
4.09	6.93
1.23	-0.5
3.08	-0.29
7.17	-0.71
0.42	-0.33
-0.13	-0.14
-0.23	-0.33
-0.22	-0.33
-0.39	-0.46
-0.08	-0.14
4.77	0.12
0.78	-1
0.59	-1.15
2.68	2.68
7.25	-1.23
0.7 -	0.37
4.46	1
2.62	-0.14
2.62	-0.14
6.04	2.28
2.6 -	0.33
2.83	-0.43
7.56	10.41
2.68	0
9.75	8.09
3.03	3.92
4.54	3.92
4.4 3	0.92
1.48	0
0.02	3.92
0.01	0
0.01	0
0 0
2.29	-0.14
6.48	-0.2
-0.12	-0.14
-0.06	0
-0.47	-0.64
-0.26	-0.73
0.39	0
7.08	7.01
3.23	3.92
-0.05	-0.14
-0.17	-0.2
-0.17	-0.2
6.4 7	0.68
-0.09	-0.14
6.99	6.27
-0.44	-0.66
3.49	0
-0.11	-0.14
6.4 6	0.59
7.51	-1.11
7.43	-0.79
3.56	-0.2
7.97	28.27
7.55	-0.35
9.1 -	0.31
0.11	2.44

## Sheet: Table C - AZS DREAM
ID	CELL_LINE	TISSUE	DRIVER_GENES
1	BT20	BREAST	HIPK3, CSMD3, COL1A1, VPS13B, NRK, EPHA5, CYFIP1, EPHA6, GRIN2A, ITPR2, LIFR, MLH1, MYH1, PIK3CA, PKHD1, LRP1B, BIRC6, ALS2, PTPRC, RAG1, RB1, NSD1, WNK1, BRCA2, THBS3, TP53, TTN, VAV1, MAP3K13, ROCK2, MYST4, PVT1, RP11-382A18.2, PLEKHB2, ARHGEF4, GOLGB1, ILDR1, MORC3, DOPEY2, LIMA1, USP22, TNRC18, RNF216, NOTCH1, GABBR2, ST14, APLP2
2	BT474	BREAST	SPEG, CSMD3, EPS15, ERCC6, ZNF423, CIC, MGA, DSTYK, NIPBL, CHD5, ITPR2, AFF3, LRP2, MLL, ATM, NFKB1, NUMA1, PER1, PIK3CA, PLD1, N4BP2, RBL2, ROS1, NSD1, PCDH15, WNK2, SORL1, BRCA2, BRDT, HNF1A, TEC, TP53, TTN, WRN, BRIP1, OBSCN, FSCB, MAP4K3, RUNX1T1, KALRN, USP6, LATS1, TBCK, RECQL4, ARHGAP29, PDE4DIP, URB2, TNNI3K, RPS6KB1, SNF8, ACACA, STAC2, ZMYND8, CEP250, TOB1, SYNRG, STX16, RAE1, AHCTF1, N…
3	BT549	BREAST	PTPRT, CLTC, COL3A1, DOCK3, FLNC, NCAPD3, LAMA1, TRIM42, KIAA1549, TTN, MAML1, ITIH5L
4	CAL120	BREAST	ODZ1, CSF1R, CYP24A1, LRP1B, KDM6A, CARD11, AKAP4, NAV3, URB2
5	CAL148	BREAST	RAD50, ODZ1, CSMD3, LRGUK, FAM123B, GPR112, ADAMTS18, ERBB4, EHBP1, BRD4, ZNF521, AFF4, LAMA1, PIK3R4, INSRR, LRP1, MLLT4, ASPH, MYT1, ROR2, PIK3CA, PLEKHA5, FMN2, PTEN, BIRC6, ROBO2, RBM15, SMARCA4, DST, TOP2A, TP53, TP53BP1, TTN, ZNF217, TRPM8, KALRN, AKAP12, CDH1
6	CAL51	BREAST	MECOM, EXT1, FBN1, DIP2C, FLNA, LAMA1, EPHA6, JAK1, MCF2, MN1, MYH9, MYH10, ROR2, NUMA1, CDKL3, PIK3CA, MYO3A, PRKAA2, PTCH1, PTEN, CHD8, BAI3, RBL2, PRDM16, NSD1, STIL, DST, TAF1, TPO, TTN, CSPP1, C6orf97, ARID1A, OBSCN, MYO18B, ITGA10, ARHGEF7, HDAC4, MYST4, KIAA0802, CEP110
7	CAMA1	BREAST	CHL1, EP300, ERCC6, EXT1, PDCD11, FLNC, NUP210, BRD4, GLTSCR1, PIK3R4, MAP3K1, NTRK1, NTRK2, PIK3C2A, RIF1, AXL, PTEN, TP53, MAP3K12, PXDN, MYO18B, BTRC, ST7, PRKAG2
8	DU4475	BREAST	NCOA2, SMC2, GPR112, DOCK3, EPHA8, FBN2, ZNF423, APC, ITGAV, ITPR1, UNC13C, PKHD1, PLCB2, MLL3, BRAF, TRPS1, CAD, MLLT10, AKAP6, APC.MC, BRAF.V600E, HHAT, SERTAD4, NRP2, PARD3B, VDAC1, SKP1
9	HCC1143	BREAST	SMC2, FGFR2, NLRP1, ZNF423, CNTN6, GRIN2A, UNC13C, NUP98, PCM1, ATRX, PPP1R3A, PTPRC, SMARCA4, TIAM1, TP53, CATSPERB, TET1, KIAA0802, TMEM241, HM13, FANCD2, MTMR14, FAM168A, RAB6A, MYO9A, HEXA, PPP1R12B, LGR6
10	HCC1187	BREAST	PAXIP1, DIP2C, SPEN, SMG1, ZNF423, MYH9, NOS2, NUP98, PRKAA2, ZNF608, TPR, TTN, ADAMTS20, PTCH2, ITIH5L, CTAGE5, GEMIN2, PUM1, TRERF1, KMT2E, LHFPL3, PPFIBP1, SMCO2, SEC22B, NOTCH2, KLK5, CDH23, PLXND1, TMCC1, AKAP13, PDE8A, CALD1, AKR1B15
11	HCC1395	BREAST	AKAP9, SPEG, CREBBP, VPS13B, EPHA8, FGFR1, TNIK, RGL1, ABL2, EPHA10, ITGB6, LRP2, MAK, MYH1, PER1, PLCG1, SEMA5B, ATRX, TRPM7, ADAMTSL3, WNK1, BRCA1, BRCA2, TAF1, TG, TP53, TP53BP1, MAP3K6, AKAP6, NANS, ANP32B, EIF3K, CYP39A1, PLA2R1, RBMS1, RAB7A, LRCH3, TMEM104, RAB37, EFTUD2, KIF18B, FOSL2, BRE, LTBP1, BIRC6
12	HCC1419	BREAST	TOPBP1, ADAMTS18, CNTN6, ACACB, ULK4, AXL, TP53, TPR, TRPM8, CUBN, TTC6, MIPOL1
13	HCC1428	BREAST	DACH1, CIC, FN1, NIPBL, GRIK1, ITGB4, SMAD4, MMP2, MYH1, NFKB1, BIRC6, ZNF608, PTPRD, WNK4, DST, TTN, NUP153, AL035610.2, FAM208B, AP001604.3, GDI2, ESR1, CCDC170, SLC37A1, ABCG1, RNF187, OBSCN, TTC39C, LAMA3, NCS1, GPR107, PLEKHF2, NDUFAF6, LRSAM1, GARNL3, FRS2, LYZ
14	HCC1500	BREAST	SPEG, ABCA3, TNIK, ATM, PAPPA, PIK3CD, TRPM7, BMP2K, PRKCB, FMN2, FANCM, MLL3, RBL2, TPR, OBSCN, PRPF4B, MMP20, BAT3, AL035610.2, CTD-3116E22.6, AP001604.3, ZNF274
15	HCC1569	BREAST	AKAP9, STAG3, ADAM29, SGK223, DOCK3, DRD2, FANCD2, TNRC6B, FN1, ARHGEF12, MED13L, PHF3, NIPBL, GHR, GLG1, ABL2, EPHA10, HDLBP, PIK3R4, ITPR1, ITPR2, LRP1, LRP6, ASPH, NOTCH4, PCM1, PER1, PGR, LRP1B, PLCG1, SEMA5B, PHIP, BMP2K, PRKD1, NYNRIN, ALS2, PTPRD, MLL3, RASA1, ROBO1, PCDH15, DST, BRCA2, TCF12, TIE1, TP53, TSHR, TTN, CSPP1, YSK4, ARID1A, MAP4K3, ADAM18, DYRK4, HERC2, NAV3, LATS1, ROCK2, NUP…
16	HCC1806	BREAST	GPR112, ADAMTS18, CPAMD8, MMP8, CNTN5, ATP10A, PREX2, CUBN, CTD-3116E22.6, ZNF274, TAX1BP1, AHCY, RFT1, UQCRC2, POLA2, CAPN1, LDLRAD3, TCP11L1, FAM222B, SEZ6, BRE, DPYSL5, CD151, DRD4, RIF1, PKD1L1
17	HCC1937	BREAST	MYO5B, CCDC11, NFIA, EHF
18	HCC1954	BREAST	HIPK3, WDHD1, COL1A1, DACH1, DPYD, DIP2C, CYFIP1, RGS22, HIPK2, ACACB, PIK3CA, ROS1, SHC1, SPTAN1, TLN1, TP53, TTN, YSK4, ITGA10, NCOA1, MYST4, PHF20L1, SAMD12, STRADB, NOP58, GALNT7, ORC4, GSDMC, PVT1, TRMT11, NCOA7, INTS1, PRKAR1B
19	HCC38	BREAST	ODZ1, MAMDC4, ADAMTS19, DNAH8, LMTK2, BRD4, MMP8, PDGFRB, MYO3A, CNTN5, SORL1, THBS3, TP53, TTN, TRIP11, AKAP6, MYST3, IMMP2L, AC003088.1, TMEM123, MMP20, MTAP, PCDH7, MBOAT2, PRKCE, RNF111, TCF12, KMT2A, ATP5L, STAT3, PTRF, SLC26A6, PRKAR2A, HMGXB3, PPARGC1B, LDHC, SERGEF
20	HCC70	BREAST	EPHB6, FLT1, FMN2, PTEN, RB1, TP53, TTN, POU5F1B
21	MCF7	BREAST	EPHA5, ERBB4, ERCC6, NLRP1, TNIK, MYH9, PIK3CA, PTPRD, BCR, WNK2, TTN, MAP3K13, ANKS1A, ATP1A1, B3GNTL1, LEMD3, NAV1, PDE8A, PLCG1, RP11-15E18.1, RP11-977B10.2, RSBN1, SMARCC1, TANC2, TTC6, UBE2E2, VAV3, ZBTB25, UHRF1BP1, ZFP64, SLC9A8, RP1-74B13.2, GPR37L1, SCAND2P, TOP1, LPPR5, SLC16A7, AP4B1-AS1, DCLRE1B, EMCN, CA4, RP11-356O9.1, RP11-20B7.1, RP11-973N13.2, BCAS4, BCAS3, ARFGEF2, SULF2, RPS6KB…
22	MDAMB157	BREAST	TC2N, FBLN5
23	MDAMB175VII	BREAST	WWOX, VAT1L, TENM4, NRG1, RSF1
24	MDAMB361	BREAST	CSMD3, AGAP2, LRGUK, GPR112, DAB1, DAXX, EIF4G1, FBN2, SPEN, FNBP1, FLNC, SIK3, MED13L, MTOR, C15orf55, GHR, ACACB, IRS1, MAST4, ARNT, UNC13C, MYH1, MYH9, PEX5L, PIK3C2G, PIK3CA, PIK3CG, PKHD1, CNTN5, ATRX, PPP1R3A, NUP133, PRKDC, ADAMTSL3, PTCH1, BIRC6, ALPK3, MKL1, CHD8, FANCM, RASGRF1, BMPR2, DST, BRCA2, TP53, TTN, PREX2, CUBN, ARID1A, TRRAP, HERC2, MAP3K13, TRIP11, PDE4DIP, RIMS2, SETDB1, NUA…
25	MDAMB415	BREAST	CDH11, CSMD3, CSF1R, MECOM, FGFR4, PPM1E, HECW1, ZNF423, C15orf2, ALK, RICTOR, LRP2, MAP3K1, LRP1B, PTEN, MLL3, ROCK1, BRAF, TP53, TTN, CHD9, MLLT10, HERC2, NAV3, KALRN, CDC42BPB, URB2, KIAA1409, RASGRF2, RBBP8, TAF4B
26	MDAMB436	BREAST	NCOA2, EPHA3, FBN2, MAST1, FLNA, SULF1, ABL1, NLRP10, MAP3K4, ASPH, CDKL3, PIK3C2B, FANCI, PRKDC, MAPK4, BIRC6, SORL1, STAT6, TRPS1, TTN, TYK2, KDM6A, WWOX, VAT1L, TYRO3, RTF1, TIAL1, MCMBP, EXOSC10, MTOR, RIMS2, ATP6V1C1, SPTAN1, GLE1
27	MDAMB453	BREAST	CDH2, HDAC6, ADAM29, VPS13B, DCLK2, DPYD, EPHB1, MAST2, FLT1, MGA, SIK3, PHF3, BRD4, RGS22, ACACB, KIAA2022, ITGAV, ITPR2, UNC13C, ASTN1, MYH11, ATM, NUP98, PIK3C2G, PIK3CA, PIK3CD, PIK3CG, PKHD1, LRP1B, PPP1R3A, PRKG1, PTEN, NYNRIN, BAI1, CHD8, RBM15, THBS3, TLN1, TP53BP1, TTN, COL14A1, TET1, ADAM18, MMP20, CDC42BPB, THRAP3, CDH1, MYST4, KIAA0802, MECP2, TMLHE, FOXP1, EIF4E3, MYO15B, MAP3K3, FAM…
28	MDAMB468	BREAST	MYO3B, EPHB6, ERBB2, FANCA, GRIN2B, KTN1, NF1, BLM, TTN, CARS, OBSCN, MAP4K3, CDKL2, POU5F1B, ATR, U2SURP, UBR5, SLC25A32, ARID1A, MAST2, RDH13, FBXO3
29	T47D	BREAST	FBN2, SPEN, PRKD3, C15orf55, GLI1, GRIK1, GUCY2C, MLLT4, PIK3CA, STK31, MLL3, TP53, ARID1A, HERC2, VGLL4, SH3BP5
30	UACC812	BREAST	AKAP9, ODZ1, CSMD3, ABCA3, SMG1, MGA, BRD4, ITGAV, MST1R, MYH1, MYH9, PI4KA, LRP1B, MYO3A, PLEKHA5, TNN, TRIO, TTN, NAV3, CDH1, CHEK2, HDGF, S100A10, WIPF2, ERBB2, PPP1R12B, SNX27, ARID1A, WDTC1, MLLT6, PLXDC1
31	KMS11	HAEMATOPOIETIC	AKAP9, SPEG, CTNNA2, SGK223, EPHA8, EXT1, FGFR3, DIP2C, ZNF423, C15orf2, LAMA1, GUCY2F, ATP13A5, SNX19, MAP3K5, MMP2, TRIM67, NOTCH3, NPAT, NIN, LRP1B, ATR, PTCH1, FANCM, PTPRD, WNK2, TTN, ZMYM2, CHD9, LATS1, IGH, NA
32	HCT116	LARGE INTESTINE	ODZ1, TNK2, DLC1, MERTK, NCOA2, ARFGEF1, SMC2, CHD1, PTPRT, LRRK2, COL1A1, COL3A1, TAF1L, GPR112, CTNNB1, DAB1, DACH1, ADAMTS19, EP300, EPHA5, ERBB3, MECOM, FASN, FBN1, FBN2, FGFR1, FGFR2, LMTK2, ZNF423, FLT3, FLT4, ATP11A, NCAPD3, FN1, SIK3, DICER1, PHF3, C15orf2, C15orf55, DSTYK, AFF4, GLG1, GNAS, TRIM42, HIPK2, PDZRN4, HDLBP, PIK3R4, ACACA, ITPR2, MAST4, KRAS, AFF3, LRP1, LRP2, LRP6, MAP3K1, M…
33	HT29	LARGE INTESTINE	SPEG, EPHA2, EPHA8, EPHB4, SPEN, ZNF423, APC, ACACB, ITGA7, SMAD4, ASTN1, PIK3CA, MAML3, AXL, FMN2, LRRC7, FANCM, PRDM16, BRAF, CDKL5, TTN, WRN, BRD3, CHD9, TP63, ARHGEF7, CDC42BPB, APC.MC, BRAF.V600E
34	LS513	LARGE INTESTINE	EPS15, MECOM, FBN2, HECW1, MGA, SIK3, ALK, MAST4, KRAS, MAP3K4, UNC13C, ROR1, PAPPA, NUP133, STK31, ADAMTSL3, BAI3, UBE2O, SMARCA4, BMPR2, BRAF, TLN1, TPR, TTN, OBSCN, HDAC4, MYST4, CTNNB1.MC, IQGAP1, LUZP1, FAM174B, TMCO4, LRBA, SH3D19
35	NCIH747	LARGE INTESTINE	ALPK2, GPR112, TTBK2, NCAPD3, APC, KRAS, EIF2AK4, ATM, PAPPA, MLL3, ROBO1, PCDH15, TP53, APC.MC
36	RKO	LARGE INTESTINE	SPEG, MERTK, ARFGEF1, CSMD3, AGAP2, GPR112, HAPLN1, DACH1, ADAMTS18, DPYD, JAG1, EIF4G1, AIM1, EP300, EPHB1, EXT1, F8, FANCA, FASN, ABCA3, FGFR1, PPM1E, HECW1, ERC1, ZNF423, CYFIP1, ATP11A, MTUS2, ARHGEF12, MED13L, BRD4, CHD5, RGS22, SACS, LATS2, AFF4, CPAMD8, GLI1, ABL2, KSR2, LAMA1, TRIM42, GLTSCR1, PIK3R4, ACACA, ATP13A5, IRS1, ITGB4, JARID2, SNX19, LRP1, LRP2, LRP6, MCM4, MAP3K1, MAP3K4, MLH1…
37	SW48	LARGE INTESTINE	HDAC6, PTPRU, AKAP9, ODZ1, TNK2, DLC1, MERTK, NCOA2, OLFM4, ARFGEF1, SMC2, CIT, PTPRT, LRGUK, CREBBP, GPR112, CTNNB1, VPS13B, DGKB, DAPK1, DNAH8, EGFR, PIKFYVE, EP300, EPHA3, EPHB4, FANCD2, FGFR1, FGFR3, PPM1E, DIP2C, PDCD11, TNIK, ERC1, ZNF423, TNRC6B, FLNA, FLNC, SULF1, FLT1, MGA, SIK3, BRD4, ALK, CHD5, SACS, CPAMD8, GNAS, ABL2, LAMA1, EPHA6, GRIA3, GUCY1A2, GLTSCR1, APC, ATP13A5, IGF1R, INPP5D…
38	SW620	LARGE INTESTINE	CLTC, ADAMTS19, DPYD, EP300, FASN, GHR, GRIK1, APC, KIAA2022, KRAS, MARK1, UNC13C, LRP1B, ADAM22, CNTN5, PRKDC, PRKG2, RAG1, RASGRF1, WNK3, TRIO, TTN, CAD, OBSCN, EIF3A, HERC2, BTRC, ADAMTS2, MYST4, APC.MC, ARNTL2, RP11-59N23.3, NSD1, ZNF346, AKAP13, PDE8A
39	SW837	LARGE INTESTINE	FAM123B, GPR112, EPHA5, SPEN, HECW1, GRIN2B, APC, KRAS, MYC, FBXW7, RPGRIP1, BAI3, THBS3, TIE1, TP53, TPR, TRPS1, TTN, CACNB2, CUBN, AKAP6, APC.MC
40	SW948	LARGE INTESTINE	EPHA3, EPHB6, ZNF423, PASK, FLNC, PDZRN4, HIP1, APC, KRAS, LRP1, SMAD4, MRE11A, ATM, NOTCH4, CDKL3, PIK3CA, PPP1R3A, BCR, TTN, CUBN, ARID1A, CARS, DCLK1, AKAP6, CDC42BPB, APC.MC, AC073283.4, EPCAM
41	A549	LUNG	HIPK3, ADAMTS19, AIM1, FLT3, HIP1, KRAS, LRP2, PAK7, KIAA1549, TNN, SMARCA4, BRD3, CARD11, MYO18B, USP6, SGK269, KEAP1.MC, RICTOR, FYB, SCAMP2, WDR72
42	DMS114	LUNG	AKAP9, CSMD3, COL3A1, SULF1, NIPBL, GLI2, HGF, MSH2, TRPM7, AXL, BAI3, ROS1, COL14A1, ZNF217, BCAS1, EXT1, SAMD12, FAM172A, KIAA0825
43	NCIH1299	LUNG	WDHD1, CLTC, COL3A1, LRGUK, MYO3B, CNTN6, ACACB, KIAA2022, LRP2, NEK1, NRAS, NIN, PEX5L, CHD8, TNN, TTN, CACNB2, PREX2, RUNX1T1, NUAK1, GRK7, MYL6, EEF1D, LNPEP, CAST
44	NCIH1437	LUNG	ABCC4, ARFGEF1, LRGUK, DAB1, DOCK3, NLRP1, NIPBL, LAMA1, MCF2, NEK1, UBR5, LRP1B, WHSC1L1, PPP1R3A, ZNF608, MLL3, RAG1, UBE2O, TCF12, TP53, TTN, DCLK1, KIAA1409, CYP24A1, FTL, DAP3, S100P, THSD4, LRRC49, CATSPERB, FBLN5
45	NCIH1563	LUNG	ODZ1, DLC1, OLFM4, ARFGEF1, CLTC, VPS13B, ERBB2, SACS, GLI2, OR2L13, PIK3R4, JAK1, EIF2AK4, MYH11, NEK1, NTRK3, LRP1B, PLD1, PRKCG, FMN2, RET, BRCA1, STAT6, TTN, NUP214, MLLT10, ARID1A, MCM3AP, HERC2, TGS1, HEPH, NUAK1, CEP110, NBAS, FAM49A
46	NCIH1703	LUNG	CDH2, CDKN2A, SMC2, CHL1, CSMD3, LRRK2, CNTN1, CREBBP, EP300, PAXIP1, FLNC, SIK3, MED13L, LATS2, KSR2, MMP8, UNC13C, MYH1, MYH11, NCAM1, ATM, NOS3, UBR5, PIK3C2G, PKHD1, KIAA1549, ALS2, PTPRC, ROBO1, TNN, SHC1, PCDH15, TTN, ADAM12, COL18A1, RUNX1T1, EIF3A, RIMS2, MKRN3, ITIH5L
47	NCIH1793	LUNG	SPEG, CHD1, WDHD1, NLRP3, CSMD3, COL3A1, GPR112, TRPM6, CSPG4, CTNNA2, DGKB, DCLK2, ADAMTS19, DPYD, EGFR, EIF4G1, EPHA7, EPHB1, ERBB2, FASN, FBN1, FBN2, TNRC6B, C15orf2, RICTOR, SACS, AFF4, LAMA1, EPHA6, GRIN2B, HIP1, APC, NLRP10, INHBA, ITGA5, ITK, JAK1, LRP6, AFF1, EIF2AK4, MYH1, MYT1, NOTCH2, NTRK3, PDGFRA, PDGFRB, PGR, PI4KA, PHIP, PRKG1, PRKG2, MAPK4, ADAMTSL3, BIRC6, NYNRIN, MKL1, BAI1, BAI…
48	NCIH1975	LUNG	SPEG, ADAM29, ALPK2, COL3A1, EGFR, PIKFYVE, SMG1, DICER1, GLI1, APC, IGF1R, MARK1, NEK1, PIK3CA, LRP1B, FMN2, NSD1, PCDH15, TOP2B, TTN, OBSCN, MAP3K6, MYST4, EIF1, PPIA, RNF130, RASGEF1C, SLC25A13, SHFM1, UBAP2, DCAF12
49	NCIH2085	LUNG	AP000525.9, LA16c-60G3.6
50	NCIH2170	LUNG	CSMD3, ALPK2, DNAH8, DPYD, EP300, EPHA5, FBN2, TNIK, MGA, SIK3, KSR2, GRIN2B, PDZRN4, ACACB, AFF3, ROR2, PIK3CG, ATR, WNK3, SRPK1, BRDT, TP53, TTN, CHD9, HERC2, KEAP1.MC
51	NCIH2228	LUNG	PTPRT, EP300, FBN2, ZNF423, GLG1, UNC13C, ATR, WHSC1L1, PAK7, BIRC6, MLL3, RB1, ROBO2, TAF1, TP53, TTN, ANP32B, FTL, SEPT7, RPL39, DCBLD2, STXBP5L, EML4, ALK, PTPN3, SND1, CFTR
52	NCIH226	LUNG	GRIN2B, APC, INPP5D, MUSK, P2RX7, PPP1R3A, ROBO1, TTN, YSK4, TAF15, OBSCN, MCM3AP
53	NCIH2291	LUNG	CDH2, DACH1, EGFR, ERBB4, PPM1E, PASK, FLNB, SIK2, MGA, MTUS2, CHD5, SACS, GUCY1A2, ACACB, NLRP10, KRAS, LRP1, LRP2, NTRK1, PER1, LRP1B, ULK4, FANCI, AXL, STK31, FMN2, RPGRIP1, ADAMTSL3, BIRC6, TNN, DST, TEK, TP53, TTN, TRPM8, CUBN, COL18A1, TAF15, CARD11, MYO18B, CDC42BPA, PRPF4B, MYLK3, RIMS2, KIAA1409, GRK7, KRT7, TUBA1C, AKAP13, PDE8A
54	NCIH23	LUNG	STAG3, PTPRT, CNTN1, COL3A1, CSF1R, MAMDC4, DNAH8, EIF4G1, FBN1, FGFR2, PASK, FLT3, EHBP1, FN1, GHR, GLI3, LAMA1, OR2L13, GRIN2B, GUCY2F, ACACA, ACACB, INPP5D, IRS1, KRAS, LRP2, MARK1, MCM4, MSH3, MYH1, MYLK, ATM, NOTCH1, ROR2, DDR2, PAPPA, PDGFRA, PKHD1, LRP1B, PLD1, CNTN5, FANCI, PRKAA2, PRKD1, LRRC7, RET, BCR, PCDH15, SMARCA4, TIAM1, TLR4, TOP2B, TP53, TTN, CACNB2, TRPM8, CATSPERB, ADAMTS20, T…
55	NCIH3122	LUNG	EML4, ALK, SOS1, ADCY3, HIF1A, PRKCH
56	NCIH358	LUNG	SPEG, MTMR11, ADAM29, NLRP3, CSMD3, LRRK2, CTNNB1, CYP24A1, DNAH8, NRK, F8, FBN2, TNIK, HECW1, ZNF423, TNRC6B, FLNC, DICER1, CHD5, SACS, GHR, GLI1, OR2L13, EPHA10, GRIA3, ATP13A5, KRAS, LRP2, MARK1, MAP3K5, AFF1, MRE11A, MSH3, MUSK, ASTN1, MYH1, NFATC1, NPR1, UBR5, PIK3CG, PKHD1, LRP1B, PRKCG, PRKD1, PRKDC, FMN2, ADAMTSL3, ZNF608, CHD8, PTPRC, KDM5A, STIL, WNK1, SORL1, DST, TG, TIAM1, TLN1, TTN, …
57	NCIH520	LUNG	AKAP9, CDKN2A, CSMD3, CREBBP, VPS13B, DNAH8, PAXIP1, FLNC, TRIM42, GRIN2B, AFF3, ATM, PIK3C2B, PI4KA, LRP1B, MYO3A, RPGRIP1, TP53, CHD9, CARD11, ROCK2, RIMS2, DOK6, PLCB4, CCDC102B, PLCB1, RCAN1, RUNX1, SUPV3L1, VPS26A
58	NCIH522	LUNG	OLFM4, CIT, GPR112, TRPM6, DGKB, ABCA3, SPEN, PASK, SIK3, MTOR, CPAMD8, GLI2, EML4, KSR2, GRIN2B, GUCY2C, KCNH2, LRP2, MSH2, PLCB2, LRP1B, XPO4, WNK2, SMARCA4, CDKL5, TP53, TTN, CSPP1, TRIP11, RIMS2, PXN, MSI1, ARHGAP10, TMEM184C, RPS6KB1, VMP1
59	NCIH838	LUNG	PTPRU, CHL1, CSMD3, DACH1, ADAMTS18, EIF4G1, MECOM, ATP11A, EHBP1, GLI2, GUCY1A2, ITGAV, KDR, MET, PRKDC, SULF2, TEX14, ADAMTSL3, BIRC6, LRRC7, KIAA1549, PTPRD, TNN, WNK1, TLN1, TRPS1, TTN, WRN, PREX2, ARID1A, FZD1, OBSCN, NCOA1, NAV3, KEAP1.MC, AP003900.6, DANCR, EMC2, MYO1C, AC008132.1, ITGB3BP, EIF3E, PITPNA
60	SW900	LUNG	PTPRT, EPHB1, EPHB6, ERCC6, FBN2, DIP2C, ZNF423, ALK, ACACB, ITGB4, KIT, KRAS, NEK1, NTRK3, LRP1B, PLCG1, ATR, RIF1, PRKG2, TP53, TRPS1, TSHR, TTN, OBSCN, AKAP6, RIMS2, SGK269, CEP110, SEPT11, CCNI, CELF1, MTCH2
61	22RV1	PROSTATE
62	C32	SKIN	AIM1, NLRP1, MTOR, LAMA1, MLL, NUMA1, PIK3CB, STK31, PAK7, ROS1, DST, BRAF, TTN, CACNB2, PTCH2, DCLK1, ULK2, CHEK2, BRAF.MC, BRAF.V600E
63	KATOIII	STOMACH	LRRK2, DNAH8, AIM1, FBN1, FN1, C15orf2, LAMA1, NLRP10, MLLT6, MSH3, ASTN1, MYH9, MYH10, ATM, NOTCH1, PEX5L, PIK3C2G, PKHD1, LRP1B, ATR, STK31, RPGRIP1, ATP10A, BLM, PCDH15, TTN, CSPP1, KIAA1804, MYO18B, CDC42BPA, KALRN, CDC42BPB, CDH1, CEP110, AP003900.6, AC008132.1
64	647V	URINARY	XXbac-BPG252P9.9, IFI27, PTK2, TRAPPC9, NCOA6, GSS
65	BFTC905	URINARY	SPEG, SGK223, MECOM, PRKD3, GLI1, ITGA5, ITPR1, NRAS, PIK3C2G, PKHD1, LRP1B, ATRX, PPP1R3A, FMN2, BAI3, BLM, SPTAN1, TTN, TRRAP, CARS, MYST4, POU5F1B, DLG1, BDH1
66	HT1197	URINARY	XXbac-BPG252P9.9, IFI27, PRKAR2A, SLC25A20, PCNX, RAD51B
67	HT1376	URINARY	PTPRU, SPEG, DGKB, TNRC6B, FLNB, C15orf2, NIPBL, PDZRN4, ACACA, IRS1, ITPR1, MLLT4, MYH1, PAPPA, PIK3C2A, PRKCI, RB1, ROBO2, TG, TP53, TTN, ARID1A, MAP4K3, CDC42BPB, PMS2, AP003900.6, AC011718.2, SCYL1, FRMD8
68	J82	URINARY	AKAP9, CSMD3, LRRK2, FGFR3, PAXIP1, SPEN, FLT1, MED13L, MTOR, GLI1, APC, NOS3, PIK3CA, BAI3, MLL3, RET, BCR, TP53, TPR, TTN, KDM6A, ADAMTS20, YSK4, COL18A1, FZD1
69	KU1919	URINARY	CHL1, EP300, FBN2, PDCD11, NIPBL, GRIN2A, GUCY2C, KTN1, LRP6, MARK1, CIITA, NRAS, MINK1, NIN, FMN2, PRDM16, TTN, KDM6A, ARID1A, CDK13, MYLK3, SGK269
70	RT4	URINARY	PTPRT, SGK223, MAMDC4, SPEN, NOTCH3, NOTCH4, ATP10A, LRRC7, TPR, TSC1, TTN, WRN, CUBN, ABCC3, TNNI3K, FGFR3, TACC3
71	SW780	URINARY	PTPRT, CREBBP, GPR112, DACH1, DNAH8, EPHB4, ZNF423, SULF1, FN1, PDZRN4, AFF3, LRP1, ASPH, NIN, WNK1, TTN, NAV3, CDH1, FGFR3, BAIAP2L1
72	T24	URINARY
73	TCCSUP	URINARY	AP003900.6, AC011718.2
74	UMUC3	URINARY	CIT, DACH1, ERBB3, F8, NUP210, GLTSCR1, JARID2, KRAS, MSH3, NOTCH4, FMN2, ZNF608, ALPK3, TTN, KDM6A, PTCH2, TBCK, HDAC4, CDH1, KIAA1409, ARRB1, PICALM
75	VMCUB1	URINARY	CDKN2A, ARFGEF1, TMEM200A, ALPK2, CREBBP, GPR112, EP300, ERBB2, FBN1, FBN2, MAST2, MTOR, DSTYK, GLG1, ACACA, APC, LRP6, MAP3K9, MST1R, MYH10, ATM, NIN, PIK3C2G, PIK3CA, LRP1B, MYO3A, ATRX, TET2, PRKCG, RBL2, ROBO2, BCR, BRCA1, TP53, KDM6A, CACNA1F, CUBN, ARID1A, FZD1

## Sheet: Table D - ONEIL
ID	CELL_LINE	TISSUE	DRIVER_GENES
1	KPL1	BREAST	EPHA5, ERBB4, ERCC6, NLRP1, TNIK, MAST4, PIK3CA, BIRC6, BCR, WNK2, TTN, ZMYM2, MAP3K13, ANKS1A, ARRB1, ATP1A1, B3GNTL1, FAM208B, LEMD3, NAV1, PDE8A, PLCG1, PPFIA1, RP11-15E18.1, RP11-977B10.2, RSBN1, SMARCC1, TANC2, TTC6, UBE2E2, VAV3, ZBTB25, UHRF1BP1, MAP6, ZFP64, SLC9A8, GDI2, RP1-74B13.2, GPR37L1, SCAND2P, TOP1, ANO1, LPPR5, SLC16A7, AP4B1-AS1, DCLRE1B, EMCN, CA4, RP11-356O9.1, RP11-20B7.1, R…
2	T47D	BREAST	FBN2, SPEN, PRKD3, C15orf55, GLI1, GRIK1, GUCY2C, MLLT4, PIK3CA, STK31, MLL3, TP53, ARID1A, HERC2, VGLL4, SH3BP5
3	MDAMB436	BREAST	NCOA2, EPHA3, FBN2, MAST1, FLNA, SULF1, ABL1, NLRP10, MAP3K4, ASPH, CDKL3, PIK3C2B, FANCI, PRKDC, MAPK4, BIRC6, SORL1, STAT6, TRPS1, TTN, TYK2, KDM6A, WWOX, VAT1L, TYRO3, RTF1, TIAL1, MCMBP, EXOSC10, MTOR, RIMS2, ATP6V1C1, SPTAN1, GLE1
4	ZR751	BREAST	DCLK2, ZNF521, MYLK, LRP1B, PTEN, HEPH, ESR1, CCDC170, MINOS1, RCC2
5	RKO	COLON	SPEG, MERTK, ARFGEF1, CSMD3, AGAP2, GPR112, HAPLN1, DACH1, ADAMTS18, DPYD, JAG1, EIF4G1, AIM1, EP300, EPHB1, EXT1, F8, FANCA, FASN, ABCA3, FGFR1, PPM1E, HECW1, ERC1, ZNF423, CYFIP1, ATP11A, MTUS2, ARHGEF12, MED13L, BRD4, CHD5, RGS22, SACS, LATS2, AFF4, CPAMD8, GLI1, ABL2, KSR2, LAMA1, TRIM42, GLTSCR1, PIK3R4, ACACA, ATP13A5, IRS1, ITGB4, JARID2, SNX19, LRP1, LRP2, LRP6, MCM4, MAP3K1, MAP3K4, MLH1…
6	HT29	COLON	SPEG, EPHA2, EPHA8, EPHB4, SPEN, ZNF423, APC, ACACB, ITGA7, SMAD4, ASTN1, PIK3CA, MAML3, AXL, FMN2, LRRC7, FANCM, PRDM16, BRAF, CDKL5, TTN, WRN, BRD3, CHD9, TP63, ARHGEF7, CDC42BPB, APC.MC, BRAF.V600E
7	SW620	COLON	CLTC, ADAMTS19, DPYD, EP300, FASN, GHR, GRIK1, APC, KIAA2022, KRAS, MARK1, UNC13C, LRP1B, ADAM22, CNTN5, PRKDC, PRKG2, RAG1, RASGRF1, WNK3, TRIO, TTN, CAD, OBSCN, EIF3A, HERC2, BTRC, ADAMTS2, MYST4, APC.MC, ARNTL2, RP11-59N23.3, NSD1, ZNF346, AKAP13, PDE8A
8	SW837	COLON	FAM123B, GPR112, EPHA5, SPEN, HECW1, GRIN2B, APC, KRAS, MYC, FBXW7, RPGRIP1, BAI3, THBS3, TIE1, TP53, TPR, TRPS1, TTN, CACNB2, CUBN, AKAP6, APC.MC
9	HCT116	COLON	ODZ1, TNK2, DLC1, MERTK, NCOA2, ARFGEF1, SMC2, CHD1, PTPRT, LRRK2, COL1A1, COL3A1, TAF1L, GPR112, CTNNB1, DAB1, DACH1, ADAMTS19, EP300, EPHA5, ERBB3, MECOM, FASN, FBN1, FBN2, FGFR1, FGFR2, LMTK2, ZNF423, FLT3, FLT4, ATP11A, NCAPD3, FN1, SIK3, DICER1, PHF3, C15orf2, C15orf55, DSTYK, AFF4, GLG1, GNAS, TRIM42, HIPK2, PDZRN4, HDLBP, PIK3R4, ACACA, ITPR2, MAST4, KRAS, AFF3, LRP1, LRP2, LRP6, MAP3K1, M…
10	LOVO	COLON	PTPRU, AKAP9, SPEG, DLC1, CHL1, CHD1, CIT, CLTC, COL3A1, LRGUK, CREBBP, CSPG4, DPYD, JAG1, AIM1, EPHA3, EPHB4, ERBB4, FBN1, FGFR3, LMTK2, NLRP1, SPEN, HECW1, MAST2, FLT1, SIK2, FLT4, EHBP1, NCAPD3, SIK3, MED13L, NIPBL, RGS22, LATS2, AFF4, GLG1, EPHA6, GUCY1A2, APAF1, ACACA, APC, INPP5D, IRS1, ITGB4, JARID2, KRAS, LRP1, LRP6, MAK, MN1, UNC13C, MSH3, MYH1, NF1, NOS2, NOS3, ATP8B1, PIK3CB, PLCB2, LR…
11	NCIH1650	LUNG	EGFR, SULF1, MAST4, CIITA, MYH1, PIK3C2A, RASGRF1, PCDH15, SMARCA4, ADAMTS2, CAPZB, UBR4
12	NCIH2122	LUNG	STAG3, EIF4G1, FGFR4, C15orf55, NLRP10, KRAS, MAP3K9, PIK3C2B, CDKL5, TP53, TSC1, TTN, HERC2, HEPH, CDH1
13	NCIH520	LUNG	AKAP9, CDKN2A, CSMD3, CREBBP, VPS13B, DNAH8, PAXIP1, FLNC, TRIM42, GRIN2B, AFF3, ATM, PIK3C2B, PI4KA, LRP1B, MYO3A, RPGRIP1, TP53, CHD9, CARD11, ROCK2, RIMS2, DOK6, PLCB4, CCDC102B, PLCB1, RCAN1, RUNX1, SUPV3L1, VPS26A
14	SKMES1	LUNG	DLC1, CSMD3, TTBK2, EPHA5, ERBB4, DICER1, RGS22, ACACB, NLRP10, ITGA5, LRP2, MAP3K9, AFF1, UNC13C, PIK3C3, LRP1B, PRKDC, ROBO1, ROBO2, ROCK1, TG, TP53, TTN, LATS1, KIAA1409, ITIH5L, ZBTB20, LSAMP
15	A427	LUNG	ANKHD1, CYSTM1, UVSSA, MAEA
16	NCIH460	LUNG	ADAM29, GPR112, DGKB, DNAH8, JAG1, EPHA7, DIP2C, HECW1, NUP210, C15orf2, C15orf55, GRIN2A, ITGB6, KDR, KRAS, LRP2, MMP2, MYH11, NIN, PIK3CA, TRPM7, PRKCG, FMN2, RPTOR, ROBO2, TIAM1, TNFAIP3, TTN, COL14A1, ZNF217, ARID1A, EIF3A, ROCK2, CEP110, KEAP1.MC, AP000525.9, SLC38A2, LA16c-60G3.6, PTMA, RCC1, UBE2D2
17	NCIH23	LUNG	STAG3, PTPRT, CNTN1, COL3A1, CSF1R, MAMDC4, DNAH8, EIF4G1, FBN1, FGFR2, PASK, FLT3, EHBP1, FN1, GHR, GLI3, LAMA1, OR2L13, GRIN2B, GUCY2F, ACACA, ACACB, INPP5D, IRS1, KRAS, LRP2, MARK1, MCM4, MSH3, MYH1, MYLK, ATM, NOTCH1, ROR2, DDR2, PAPPA, PDGFRA, PKHD1, LRP1B, PLD1, CNTN5, FANCI, PRKAA2, PRKD1, LRRC7, RET, BCR, PCDH15, SMARCA4, TIAM1, TLR4, TOP2B, TP53, TTN, CACNB2, TRPM8, CATSPERB, ADAMTS20, T…
18	A375	MELANOMA	CHD1, GPR112, CYP24A1, MECOM, FGFR2, SULF1, FN1, C15orf2, MTOR, HGF, LRP1, MCF2, UNC13C, ASTN1, MYH9, NOTCH3, MAML3, BIRC6, PTPRD, ROBO2, BRAF, THBS3, TTN, TRRAP, AKAP4, PRPF4B, HERC2, KALRN, PDE4DIP, BRAF.MC, BRAF.V600E, AP003900.6, AC011718.2, ST3GAL2, COG4
19	A2058	MELANOMA	TAF1L, EPHA5, CHD5, KIAA2022, LIFR, PTEN, RB1, RNASEL, TNN, BRAF, TP53, TTN, CACNB2, OBSCN, TP63, RABEP1, TNNI3K, BRAF.MC, BRAF.V600E, DEPDC1B, ELOVL7
20	SKMEL30	MELANOMA	TNK2, SPEG, ADAM28, CSMD3, COL1A1, MAPKBP1, SPEN, ALK, CPAMD8, APC, ITPR2, MAP3K4, MMP2, NOTCH1, NRAS, PIK3C3, LRP1B, FMN2, BAI3, ROBO2, BLM, BRAF, TCF12, TP53, TPR, TRPS1, TTN, RABEP1, SGK269, MYST3
21	UACC62	MELANOMA	TMEM200A, GPR112, DAPK1, C15orf55, GLI2, LAMA1, ACACA, ITGA5, MARK1, MYH1, NPAT, CNTN5, PTEN, LRRC7, ROS1, BRCA1, BRAF, TTN, TRRAP, OBSCN, BRAF.MC, BRAF.V600E, MCM5, TOM1
22	RPMI7951	MELANOMA	ALPK2, AGAP2, EIF4G1, MGA, MET, UNC13C, CNTN5, BRAF, TP53, TTN, BRIP1, DYRK4, HDAC4, BRAF.MC, BRAF.V600E, ADAM17, YWHAQ
23	HT144	MELANOMA	ABCC4, ADAMTS18, EPHA7, LMTK2, FLNB, MAP3K5, ATM, NUP133, WNK2, BRAF, TLR3, TTN, NUP214, CDK13, BRAF.MC, BRAF.V600E, BAGE2, CTBP2P1
24	A2780	OVARIAN	CSMD3, TRPM6, NIPBL, LAMA1, HIP1, INPP5D, LRP1, MAP3K5, UNC13C, NOTCH1, NOTCH3, PIK3CA, PTEN, BIRC6, SMARCA4, BRAF, PXDN, ARID1A, PTCH2, SGK269
25	SKOV3	OVARIAN	CSMD3, EP300, ERC1, NUP210, FN1, MED13L, PHF3, GLTSCR1, INSRR, LRP2, MYH11, NF1, NOTCH2, PIK3CA, PHIP, FBXW7, FMN2, RASGRF1, ROS1, BCL11B, WNK1, NCOA3, ARID1A, TP63, NCOA1, HERC2, PPFIBP1, SMCO2, HOOK2, ACTN3, TBC1D22A, GRAMD4, ERBB2IP, NLN
26	ES2	OVARIAN	HDAC6, HIPK3, ODZ1, DNAH8, FANCA, FGFR3, FGFR4, SPEN, C15orf2, C15orf55, KCNH2, UNC13C, PKHD1, ATRX, PRKCG, BRAF, TEK, TP53, TTN, ADAMTS20, TRRAP, MAP4K3, RASGRF2, BRAF.V600E, YAP1, MAML2
27	OV90	OVARIAN	CDKN2A, CSMD3, MAMDC4, FGFR4, SPEN, NUP210, SIK2, ITGB4, SMAD4, MYLK, BCR, TP53, TTN, TNKS2, AATK, MAML1, THRAP3, NUP153, TM2D2, ADAM9
28	CAOV3	OVARIAN	MTMR11, CTNNA2, EGFR, EPHA5, TNRC6B, KIAA2022, NUMA1, PER1, LRP1B, NYNRIN, TP53, AKAP6, IGF2R, SYTL3, STX5, WDR74, RPS6KB1, VMP1, PLEKHA6, PIK3C2B
29	VCAP	PROSTATE	RICTOR, EPHA6, TP53, C6orf97, OBSCN, MAP4K4, USP10, ZDHHC7, TMPRSS2, ERG, PIK3C2A, TEAD1, HJURP, EIF4E2, LMAN2, AP3S1, ABCB9, RC3H2, RGS3, INPP4A, PDE4D, C5orf47, FAM172A, NDUFAF2, MAST4, JMY, DMGDH, TTC6, MIPOL1, ZBTB20, LSAMP

## Sheet: Table E - Pathways
Figure 1:
	REACTOME_SIGNALING_BY_ERBB2
	BIDUS_METASTASIS_UP
	KEGG_FOCAL_ADHESION
	KEGG_ERBB_SIGNALING_PATHWAY
Figure 4b:
	REACTOME_SIGNALING_BY_SCF_KIT
	KEGG_MAPK_SIGNALING_PATHWAY
	BENPORATH_ES_CORE_NINE_CORRELATED
	CHARAFE_BREAST_CANCER_LUMINAL_VS_BASAL_DN
	RHODES_UNDIFFERENTIATED_CANCER
	KEGG_ERBB_SIGNALING_PATHWAY
Figure 4c:
	LEI_MYB_TARGETS
	CASORELLI_APL_SECONDARY_VS_DE_NOVO_UP
	BIOCARTA_ACH_PATHWAY
	BIOCARTA_NKCELLS_PATHWAY
	ZHOU_CELL_CYCLE_GENES_IN_IR_RESPONSE_6HR
	REACTOME_SIGNALLING_TO_RAS
